# Supplementary material for: EDN1 and NTF3 in keloid pathogenesis: computational and experimental evidence as novel diagnostic biomarkers for fibrosis and inflammation
Source: Front Genet. 2025 Feb 20;16:1516451. doi: 10.3389/fgene.2025.1516451 (PMC11882859; doi:10.3389/fgene.2025.1516451)
Supplement: Supplementary file 1 [file Table2.xlsx]

## Sheet: Sheet1
Gene Symbol	Description	Category	Uniprot ID	Gifts	GC Id	Relevance score	GeneCards Link
CAT	Catalase	Protein Coding	P04040	60	GC11P034460	45.3205	https://www.genecards.org/cgi-bin/carddisp.pl?gene=CAT
SOD1	Superoxide Dismutase 1	Protein Coding	P00441	61	GC21P031659	43.5778	https://www.genecards.org/cgi-bin/carddisp.pl?gene=SOD1
NFE2L2	NFE2 Like BZIP Transcription Factor 2	Protein Coding	Q16236	60	GC02M177227	43.4369	https://www.genecards.org/cgi-bin/carddisp.pl?gene=NFE2L2
OXSR1	Oxidative Stress Responsive Kinase 1	Protein Coding	O95747	48	GC03P038298	37.4806	https://www.genecards.org/cgi-bin/carddisp.pl?gene=OXSR1
OSGIN1	Oxidative Stress Induced Growth Inhibitor 1	Protein Coding	Q9UJX0	39	GC16P089150	34.863	https://www.genecards.org/cgi-bin/carddisp.pl?gene=OSGIN1
SOD2	Superoxide Dismutase 2	Protein Coding	P04179	56	GC06M159669	34.761	https://www.genecards.org/cgi-bin/carddisp.pl?gene=SOD2
OSER1	Oxidative Stress Responsive Serine Rich 1	Protein Coding	Q9NX31	38	GC20M044195	32.774	https://www.genecards.org/cgi-bin/carddisp.pl?gene=OSER1
TP53	Tumor Protein P53	Protein Coding	P04637	62	GC17M007661	30.9914	https://www.genecards.org/cgi-bin/carddisp.pl?gene=TP53
HMOX1	Heme Oxygenase 1	Protein Coding	P09601	61	GC22P035380	30.3042	https://www.genecards.org/cgi-bin/carddisp.pl?gene=HMOX1
GSR	Glutathione-Disulfide Reductase	Protein Coding	P00390	59	GC08M030678	30.0463	https://www.genecards.org/cgi-bin/carddisp.pl?gene=GSR
OSGIN2	Oxidative Stress Induced Growth Inhibitor Family Member 2	Protein Coding	Q9Y236	37	GC08P089901	29.6914	https://www.genecards.org/cgi-bin/carddisp.pl?gene=OSGIN2
PARK7	Parkinsonism Associated Deglycase	Protein Coding	Q99497	56	GC01P039429	26.3436	https://www.genecards.org/cgi-bin/carddisp.pl?gene=PARK7
MAPK8	Mitogen-Activated Protein Kinase 8	Protein Coding	P45983	58	GC10P048306	25.0596	https://www.genecards.org/cgi-bin/carddisp.pl?gene=MAPK8
SIRT1	Sirtuin 1	Protein Coding	Q96EB6	58	GC10P067884	24.3	https://www.genecards.org/cgi-bin/carddisp.pl?gene=SIRT1
TXN	Thioredoxin	Protein Coding	P10599	55	GC09M110243	23.9966	https://www.genecards.org/cgi-bin/carddisp.pl?gene=TXN
GPX1	Glutathione Peroxidase 1	Protein Coding	P07203	51	GC03M053731	23.7992	https://www.genecards.org/cgi-bin/carddisp.pl?gene=GPX1
NQO1	NAD(P)H Quinone Dehydrogenase 1	Protein Coding	P15559	56	GC16M069706	23.6831	https://www.genecards.org/cgi-bin/carddisp.pl?gene=NQO1
MAP3K5	Mitogen-Activated Protein Kinase Kinase Kinase 5	Protein Coding	Q99683	57	GC06M136557	22.5296	https://www.genecards.org/cgi-bin/carddisp.pl?gene=MAP3K5
FOXO3	Forkhead Box O3	Protein Coding	O43524	56	GC06P108559	22.1573	https://www.genecards.org/cgi-bin/carddisp.pl?gene=FOXO3
XDH	Xanthine Dehydrogenase	Protein Coding	P47989	56	GC02M031334	21.6081	https://www.genecards.org/cgi-bin/carddisp.pl?gene=XDH
FOXO1	Forkhead Box O1	Protein Coding	Q12778	60	GC13M040555	21.5983	https://www.genecards.org/cgi-bin/carddisp.pl?gene=FOXO1
KEAP1	Kelch Like ECH Associated Protein 1	Protein Coding	Q14145	56	GC19M010486	20.9027	https://www.genecards.org/cgi-bin/carddisp.pl?gene=KEAP1
CASP3	Caspase 3	Protein Coding	P42574	58	GC04M184627	20.8387	https://www.genecards.org/cgi-bin/carddisp.pl?gene=CASP3
MAPK14	Mitogen-Activated Protein Kinase 14	Protein Coding	Q16539	60	GC06P134977	20.7777	https://www.genecards.org/cgi-bin/carddisp.pl?gene=MAPK14
PON1	Paraoxonase 1	Protein Coding	P27169	56	GC07M095297	20.5218	https://www.genecards.org/cgi-bin/carddisp.pl?gene=PON1
GSTM1	Glutathione S-Transferase Mu 1	Protein Coding	P09488	51	GC01P109687	20.4628	https://www.genecards.org/cgi-bin/carddisp.pl?gene=GSTM1
MAPK1	Mitogen-Activated Protein Kinase 1	Protein Coding	P28482	61	GC22M021759	19.8275	https://www.genecards.org/cgi-bin/carddisp.pl?gene=MAPK1
IL6	Interleukin 6	Protein Coding	P05231	60	GC07P022725	19.4282	https://www.genecards.org/cgi-bin/carddisp.pl?gene=IL6
MPO	Myeloperoxidase	Protein Coding	P05164	61	GC17M058269	19.3057	https://www.genecards.org/cgi-bin/carddisp.pl?gene=MPO
PRDX2	Peroxiredoxin 2	Protein Coding	P32119	54	GC19M012796	19.0865	https://www.genecards.org/cgi-bin/carddisp.pl?gene=PRDX2
TNF	Tumor Necrosis Factor	Protein Coding	P01375	61	GC06P134820	18.788	https://www.genecards.org/cgi-bin/carddisp.pl?gene=TNF
JUN	Jun Proto-Oncogene, AP-1 Transcription Factor Subunit	Protein Coding	P05412	58	GC01M058780	18.7657	https://www.genecards.org/cgi-bin/carddisp.pl?gene=JUN
PARP1	Poly(ADP-Ribose) Polymerase 1	Protein Coding	P09874	59	GC01M226360	18.3041	https://www.genecards.org/cgi-bin/carddisp.pl?gene=PARP1
CYCS	Cytochrome C, Somatic	Protein Coding	P99999	57	GC07M025118	18.1171	https://www.genecards.org/cgi-bin/carddisp.pl?gene=CYCS
APP	Amyloid Beta Precursor Protein	Protein Coding	P05067	59	GC21M025880	17.7387	https://www.genecards.org/cgi-bin/carddisp.pl?gene=APP
CYBA	Cytochrome B-245 Alpha Chain	Protein Coding	P13498	55	GC16M088643	17.2376	https://www.genecards.org/cgi-bin/carddisp.pl?gene=CYBA
NOS3	Nitric Oxide Synthase 3	Protein Coding	P29474	59	GC07P158097	16.9621	https://www.genecards.org/cgi-bin/carddisp.pl?gene=NOS3
SOD3	Superoxide Dismutase 3	Protein Coding	P08294	52	GC04P025034	16.9541	https://www.genecards.org/cgi-bin/carddisp.pl?gene=SOD3
GSTP1	Glutathione S-Transferase Pi 1	Protein Coding	P09211	59	GC11P067583	16.4448	https://www.genecards.org/cgi-bin/carddisp.pl?gene=GSTP1
NOS2	Nitric Oxide Synthase 2	Protein Coding	P35228	58	GC17M027756	16.3612	https://www.genecards.org/cgi-bin/carddisp.pl?gene=NOS2
GSTT1	Glutathione S-Transferase Theta 1	Protein Coding	P30711	41	GC22Mi00270	16.2845	https://www.genecards.org/cgi-bin/carddisp.pl?gene=GSTT1
OGG1	8-Oxoguanine DNA Glycosylase	Protein Coding	O15527	56	GC03P021488	15.7564	https://www.genecards.org/cgi-bin/carddisp.pl?gene=OGG1
TRPM2	Transient Receptor Potential Cation Channel Subfamily M Member 2	Protein Coding	O94759	43	GC21P044350	15.6504	https://www.genecards.org/cgi-bin/carddisp.pl?gene=TRPM2
CRP	C-Reactive Protein	Protein Coding	P02741	54	GC01M161311	15.6391	https://www.genecards.org/cgi-bin/carddisp.pl?gene=CRP
G6PD	Glucose-6-Phosphate Dehydrogenase	Protein Coding	P11413	59	GC0XM154598	15.523	https://www.genecards.org/cgi-bin/carddisp.pl?gene=G6PD
INS	Insulin	Protein Coding	P01308	56	GC11M002159	15.4886	https://www.genecards.org/cgi-bin/carddisp.pl?gene=INS
PRDX3	Peroxiredoxin 3	Protein Coding	P30048	51	GC10M119167	15.219	https://www.genecards.org/cgi-bin/carddisp.pl?gene=PRDX3
PRDX5	Peroxiredoxin 5	Protein Coding	P30044	53	GC11P088959	14.7518	https://www.genecards.org/cgi-bin/carddisp.pl?gene=PRDX5
ABL1	ABL Proto-Oncogene 1, Non-Receptor Tyrosine Kinase	Protein Coding	P00519	61	GC09P130713	14.5453	https://www.genecards.org/cgi-bin/carddisp.pl?gene=ABL1
BAX	BCL2 Associated X, Apoptosis Regulator	Protein Coding	Q07812	60	GC19P048954	14.5091	https://www.genecards.org/cgi-bin/carddisp.pl?gene=BAX
BCL2	BCL2 Apoptosis Regulator	Protein Coding	P10415	59	GC18M063123	14.4078	https://www.genecards.org/cgi-bin/carddisp.pl?gene=BCL2
TXNIP	Thioredoxin Interacting Protein	Protein Coding	Q9H3M7	47	GC01M145992	14.2859	https://www.genecards.org/cgi-bin/carddisp.pl?gene=TXNIP
PRKCD	Protein Kinase C Delta	Protein Coding	Q05655	60	GC03P053156	14.2266	https://www.genecards.org/cgi-bin/carddisp.pl?gene=PRKCD
SHC1	SHC Adaptor Protein 1	Protein Coding	P29353	53	GC01M154962	14.1931	https://www.genecards.org/cgi-bin/carddisp.pl?gene=SHC1
PRDX6	Peroxiredoxin 6	Protein Coding	P30041	54	GC01P173477	14.0794	https://www.genecards.org/cgi-bin/carddisp.pl?gene=PRDX6
SNCA	Synuclein Alpha	Protein Coding	P37840	60	GC04M089724	14.037	https://www.genecards.org/cgi-bin/carddisp.pl?gene=SNCA
PRKN	Parkin RBR E3 Ubiquitin Protein Ligase	Protein Coding	O60260	58	GC06M161348	14.0327	https://www.genecards.org/cgi-bin/carddisp.pl?gene=PRKN
TXNRD1	Thioredoxin Reductase 1	Protein Coding	Q16881	52	GC12P104215	13.9502	https://www.genecards.org/cgi-bin/carddisp.pl?gene=TXNRD1
AKT1	AKT Serine/Threonine Kinase 1	Protein Coding	P31749	62	GC14M104769	13.8753	https://www.genecards.org/cgi-bin/carddisp.pl?gene=AKT1
NOX4	NADPH Oxidase 4	Protein Coding	Q9NPH5	51	GC11M089324	13.8324	https://www.genecards.org/cgi-bin/carddisp.pl?gene=NOX4
ALB	Albumin	Protein Coding	P02768	58	GC04P073397	13.679	https://www.genecards.org/cgi-bin/carddisp.pl?gene=ALB
HSPA4	Heat Shock Protein Family A (Hsp70) Member 4	Protein Coding	P34932	52	GC05P133062	13.6563	https://www.genecards.org/cgi-bin/carddisp.pl?gene=HSPA4
UCP2	Uncoupling Protein 2	Protein Coding	P55851	55	GC11M073974	13.6275	https://www.genecards.org/cgi-bin/carddisp.pl?gene=UCP2
TXN2	Thioredoxin 2	Protein Coding	Q99757	49	GC22M036467	13.596	https://www.genecards.org/cgi-bin/carddisp.pl?gene=TXN2
CYBB	Cytochrome B-245 Beta Chain	Protein Coding	P04839	58	GC0XP037780	13.4496	https://www.genecards.org/cgi-bin/carddisp.pl?gene=CYBB
APEX1	Apurinic/Apyrimidinic Endodeoxyribonuclease 1	Protein Coding	P27695	54	GC14P020455	13.2876	https://www.genecards.org/cgi-bin/carddisp.pl?gene=APEX1
PRDX1	Peroxiredoxin 1	Protein Coding	Q06830	58	GC01M045753	13.2809	https://www.genecards.org/cgi-bin/carddisp.pl?gene=PRDX1
CP	Ceruloplasmin	Protein Coding	P00450	57	GC03M149162	13.2563	https://www.genecards.org/cgi-bin/carddisp.pl?gene=CP
CXCL8	C-X-C Motif Chemokine Ligand 8	Protein Coding	P10145	53	GC04P073740	13.1658	https://www.genecards.org/cgi-bin/carddisp.pl?gene=CXCL8
NFKB1	Nuclear Factor Kappa B Subunit 1	Protein Coding	P19838	61	GC04P102501	12.9352	https://www.genecards.org/cgi-bin/carddisp.pl?gene=NFKB1
MSRA	Methionine Sulfoxide Reductase A	Protein Coding	Q9UJ68	49	GC08P010054	12.9295	https://www.genecards.org/cgi-bin/carddisp.pl?gene=MSRA
HSPB1	Heat Shock Protein Family B (Small) Member 1	Protein Coding	P04792	60	GC07P076302	12.8629	https://www.genecards.org/cgi-bin/carddisp.pl?gene=HSPB1
GPX7	Glutathione Peroxidase 7	Protein Coding	Q96SL4	51	GC01P052602	12.6925	https://www.genecards.org/cgi-bin/carddisp.pl?gene=GPX7
FAM120A	Family With Sequence Similarity 120 Member A	Protein Coding	Q9NZB2	42	GC09P100392	12.4583	https://www.genecards.org/cgi-bin/carddisp.pl?gene=FAM120A
SQSTM1	Sequestosome 1	Protein Coding	Q13501	58	GC05P179806	12.427	https://www.genecards.org/cgi-bin/carddisp.pl?gene=SQSTM1
ADIPOQ	Adiponectin, C1Q And Collagen Domain Containing	Protein Coding	Q15848	55	GC03P186842	12.3858	https://www.genecards.org/cgi-bin/carddisp.pl?gene=ADIPOQ
GCLC	Glutamate-Cysteine Ligase Catalytic Subunit	Protein Coding	P48506	53	GC06M053497	12.3177	https://www.genecards.org/cgi-bin/carddisp.pl?gene=GCLC
PRKD1	Protein Kinase D1	Protein Coding	Q15139	58	GC14M029576	12.2652	https://www.genecards.org/cgi-bin/carddisp.pl?gene=PRKD1
TGFB1	Transforming Growth Factor Beta 1	Protein Coding	P01137	61	GC19M041301	12.2604	https://www.genecards.org/cgi-bin/carddisp.pl?gene=TGFB1
SP1	Sp1 Transcription Factor	Protein Coding	P08047	55	GC12P053380	12.2311	https://www.genecards.org/cgi-bin/carddisp.pl?gene=SP1
GPX3	Glutathione Peroxidase 3	Protein Coding	P22352	50	GC05P152433	12.0373	https://www.genecards.org/cgi-bin/carddisp.pl?gene=GPX3
MAPK10	Mitogen-Activated Protein Kinase 10	Protein Coding	P53779	55	GC04M085990	11.8888	https://www.genecards.org/cgi-bin/carddisp.pl?gene=MAPK10
PRDX4	Peroxiredoxin 4	Protein Coding	Q13162	48	GC0XP023665	11.8671	https://www.genecards.org/cgi-bin/carddisp.pl?gene=PRDX4
MAPK3	Mitogen-Activated Protein Kinase 3	Protein Coding	P27361	58	GC16M044057	11.7158	https://www.genecards.org/cgi-bin/carddisp.pl?gene=MAPK3
NOX1	NADPH Oxidase 1	Protein Coding	Q9Y5S8	52	GC0XM100843	11.7085	https://www.genecards.org/cgi-bin/carddisp.pl?gene=NOX1
GAPDH	Glyceraldehyde-3-Phosphate Dehydrogenase	Protein Coding	P04406	59	GC12P038965	11.4934	https://www.genecards.org/cgi-bin/carddisp.pl?gene=GAPDH
FOS	Fos Proto-Oncogene, AP-1 Transcription Factor Subunit	Protein Coding	P01100	59	GC14P075278	11.4691	https://www.genecards.org/cgi-bin/carddisp.pl?gene=FOS
PINK1	PTEN Induced Kinase 1	Protein Coding	Q9BXM7	55	GC01P041392	11.3847	https://www.genecards.org/cgi-bin/carddisp.pl?gene=PINK1
PON2	Paraoxonase 2	Protein Coding	Q15165	52	GC07M095404	11.3265	https://www.genecards.org/cgi-bin/carddisp.pl?gene=PON2
CCL2	C-C Motif Chemokine Ligand 2	Protein Coding	P13500	58	GC17P034255	11.3074	https://www.genecards.org/cgi-bin/carddisp.pl?gene=CCL2
HIF1A	Hypoxia Inducible Factor 1 Subunit Alpha	Protein Coding	Q16665	57	GC14P061695	11.2398	https://www.genecards.org/cgi-bin/carddisp.pl?gene=HIF1A
ATF4	Activating Transcription Factor 4	Protein Coding	P18848	55	GC22P039519	11.2159	https://www.genecards.org/cgi-bin/carddisp.pl?gene=ATF4
MSRB2	Methionine Sulfoxide Reductase B2	Protein Coding	Q9Y3D2	48	GC10P023095	11.2071	https://www.genecards.org/cgi-bin/carddisp.pl?gene=MSRB2
NOS1	Nitric Oxide Synthase 1	Protein Coding	P29475	58	GC12M117208	11.1701	https://www.genecards.org/cgi-bin/carddisp.pl?gene=NOS1
SIRT3	Sirtuin 3	Protein Coding	Q9NTG7	56	GC11M000215	11.1436	https://www.genecards.org/cgi-bin/carddisp.pl?gene=SIRT3
BCL2L1	BCL2 Like 1	Protein Coding	Q07817	57	GC20M031664	11.1169	https://www.genecards.org/cgi-bin/carddisp.pl?gene=BCL2L1
SRC	SRC Proto-Oncogene, Non-Receptor Tyrosine Kinase	Protein Coding	P12931	60	GC20P037344	10.9148	https://www.genecards.org/cgi-bin/carddisp.pl?gene=SRC
CYP1A1	Cytochrome P450 Family 1 Subfamily A Member 1	Protein Coding	P04798	56	GC15M074719	10.8908	https://www.genecards.org/cgi-bin/carddisp.pl?gene=CYP1A1
CYP2E1	Cytochrome P450 Family 2 Subfamily E Member 1	Protein Coding	P05181	55	GC10P133520	10.8541	https://www.genecards.org/cgi-bin/carddisp.pl?gene=CYP2E1
SRXN1	Sulfiredoxin 1	Protein Coding	Q9BYN0	38	GC20M000663	10.8392	https://www.genecards.org/cgi-bin/carddisp.pl?gene=SRXN1
PPARGC1A	PPARG Coactivator 1 Alpha	Protein Coding	Q9UBK2	55	GC04M023755	10.601	https://www.genecards.org/cgi-bin/carddisp.pl?gene=PPARGC1A
GGT1	Gamma-Glutamyltransferase 1	Protein Coding	P19440	58	GC22P024583	10.4631	https://www.genecards.org/cgi-bin/carddisp.pl?gene=GGT1
SELENON	Selenoprotein N	Protein Coding	Q9NZV5	47	GC01P025800	10.408	https://www.genecards.org/cgi-bin/carddisp.pl?gene=SELENON
SIRT2	Sirtuin 2	Protein Coding	Q8IXJ6	56	GC19M038878	10.3849	https://www.genecards.org/cgi-bin/carddisp.pl?gene=SIRT2
ATF2	Activating Transcription Factor 2	Protein Coding	P15336	54	GC02M175072	10.3598	https://www.genecards.org/cgi-bin/carddisp.pl?gene=ATF2
ATM	ATM Serine/Threonine Kinase	Protein Coding	Q13315	61	GC11P108223	10.3185	https://www.genecards.org/cgi-bin/carddisp.pl?gene=ATM
ANXA5	Annexin A5	Protein Coding	P08758	56	GC04M121667	10.263	https://www.genecards.org/cgi-bin/carddisp.pl?gene=ANXA5
VEGFA	Vascular Endothelial Growth Factor A	Protein Coding	P15692	57	GC06P043770	10.2328	https://www.genecards.org/cgi-bin/carddisp.pl?gene=VEGFA
MSRB1	Methionine Sulfoxide Reductase B1	Protein Coding	Q9NZV6	43	GC16M020292	10.2131	https://www.genecards.org/cgi-bin/carddisp.pl?gene=MSRB1
CDKN2A	Cyclin Dependent Kinase Inhibitor 2A	Protein Coding	Q8N726	60	GC09M021967	10.2097	https://www.genecards.org/cgi-bin/carddisp.pl?gene=CDKN2A
CYGB	Cytoglobin	Protein Coding	Q8WWM9	48	GC17M076527	10.0903	https://www.genecards.org/cgi-bin/carddisp.pl?gene=CYGB
SIRT6	Sirtuin 6	Protein Coding	Q8N6T7	52	GC19M004174	10.0838	https://www.genecards.org/cgi-bin/carddisp.pl?gene=SIRT6
JUNB	JunB Proto-Oncogene, AP-1 Transcription Factor Subunit	Protein Coding	P17275	49	GC19P012791	10.0773	https://www.genecards.org/cgi-bin/carddisp.pl?gene=JUNB
GPX4	Glutathione Peroxidase 4	Protein Coding	P36969	56	GC19P001103	10.0211	https://www.genecards.org/cgi-bin/carddisp.pl?gene=GPX4
MGST1	Microsomal Glutathione S-Transferase 1	Protein Coding	P10620	50	GC12P016347	9.99005	https://www.genecards.org/cgi-bin/carddisp.pl?gene=MGST1
APOE	Apolipoprotein E	Protein Coding	P02649	59	GC19P113251	9.95968	https://www.genecards.org/cgi-bin/carddisp.pl?gene=APOE
PPARG	Peroxisome Proliferator Activated Receptor Gamma	Protein Coding	P37231	61	GC03P012287	9.94248	https://www.genecards.org/cgi-bin/carddisp.pl?gene=PPARG
NUDT1	Nudix Hydrolase 1	Protein Coding	P36639	51	GC07P002242	9.91003	https://www.genecards.org/cgi-bin/carddisp.pl?gene=NUDT1
HSPA1A	Heat Shock Protein Family A (Hsp70) Member 1A	Protein Coding	P0DMV8	55	GC06P134838	9.89498	https://www.genecards.org/cgi-bin/carddisp.pl?gene=HSPA1A
PTGS2	Prostaglandin-Endoperoxide Synthase 2	Protein Coding	P35354	58	GC01M186671	9.88429	https://www.genecards.org/cgi-bin/carddisp.pl?gene=PTGS2
TF	Transferrin	Protein Coding	P02787	59	GC03P139072	9.87094	https://www.genecards.org/cgi-bin/carddisp.pl?gene=TF
CASP9	Caspase 9	Protein Coding	P55211	56	GC01M015491	9.80569	https://www.genecards.org/cgi-bin/carddisp.pl?gene=CASP9
CREB1	CAMP Responsive Element Binding Protein 1	Protein Coding	P16220	59	GC02P207529	9.7929	https://www.genecards.org/cgi-bin/carddisp.pl?gene=CREB1
TMEM161A	Transmembrane Protein 161A	Protein Coding	Q9NX61	41	GC19M092435	9.73977	https://www.genecards.org/cgi-bin/carddisp.pl?gene=TMEM161A
LMNA	Lamin A/C	Protein Coding	P02545	58	GC01P156082	9.73342	https://www.genecards.org/cgi-bin/carddisp.pl?gene=LMNA
FOXO4	Forkhead Box O4	Protein Coding	P98177	50	GC0XP071095	9.6943	https://www.genecards.org/cgi-bin/carddisp.pl?gene=FOXO4
GLRX	Glutaredoxin	Protein Coding	P35754	52	GC05M095752	9.68473	https://www.genecards.org/cgi-bin/carddisp.pl?gene=GLRX
PRKCB	Protein Kinase C Beta	Protein Coding	P05771	58	GC16P081181	9.58183	https://www.genecards.org/cgi-bin/carddisp.pl?gene=PRKCB
MMP2	Matrix Metallopeptidase 2	Protein Coding	P08253	61	GC16P082389	9.44621	https://www.genecards.org/cgi-bin/carddisp.pl?gene=MMP2
MAPKAPK2	MAPK Activated Protein Kinase 2	Protein Coding	P49137	55	GC01P206684	9.35008	https://www.genecards.org/cgi-bin/carddisp.pl?gene=MAPKAPK2
PLA2G7	Phospholipase A2 Group VII	Protein Coding	Q13093	59	GC06M046704	9.31453	https://www.genecards.org/cgi-bin/carddisp.pl?gene=PLA2G7
AGTR1	Angiotensin II Receptor Type 1	Protein Coding	P30556	60	GC03P148697	9.27238	https://www.genecards.org/cgi-bin/carddisp.pl?gene=AGTR1
FXN	Frataxin	Protein Coding	Q16595	55	GC09P069035	9.26992	https://www.genecards.org/cgi-bin/carddisp.pl?gene=FXN
CAV1	Caveolin 1	Protein Coding	Q03135	57	GC07P116524	9.20994	https://www.genecards.org/cgi-bin/carddisp.pl?gene=CAV1
NOL3	Nucleolar Protein 3	Protein Coding	O60936	48	GC16P082810	9.17096	https://www.genecards.org/cgi-bin/carddisp.pl?gene=NOL3
PRKCA	Protein Kinase C Alpha	Protein Coding	P17252	59	GC17P066302	9.11404	https://www.genecards.org/cgi-bin/carddisp.pl?gene=PRKCA
AGER	Advanced Glycosylation End-Product Specific Receptor	Protein Coding	Q15109	55	GC06M032180	9.00629	https://www.genecards.org/cgi-bin/carddisp.pl?gene=AGER
SLC7A11	Solute Carrier Family 7 Member 11	Protein Coding	Q9UPY5	53	GC04M138164	8.95954	https://www.genecards.org/cgi-bin/carddisp.pl?gene=SLC7A11
DDIT3	DNA Damage Inducible Transcript 3	Protein Coding	P35638	55	GC12M057516	8.94752	https://www.genecards.org/cgi-bin/carddisp.pl?gene=DDIT3
PPIA	Peptidylprolyl Isomerase A	Protein Coding	P62937	54	GC07P044817	8.93455	https://www.genecards.org/cgi-bin/carddisp.pl?gene=PPIA
MDM2	MDM2 Proto-Oncogene	Protein Coding	Q00987	62	GC12P068808	8.85004	https://www.genecards.org/cgi-bin/carddisp.pl?gene=MDM2
TXNRD2	Thioredoxin Reductase 2	Protein Coding	Q9NNW7	54	GC22M020053	8.83984	https://www.genecards.org/cgi-bin/carddisp.pl?gene=TXNRD2
MAP2K4	Mitogen-Activated Protein Kinase Kinase 4	Protein Coding	P45985	56	GC17P012020	8.82592	https://www.genecards.org/cgi-bin/carddisp.pl?gene=MAP2K4
NLRP3	NLR Family Pyrin Domain Containing 3	Protein Coding	Q96P20	57	GC01P247416	8.80907	https://www.genecards.org/cgi-bin/carddisp.pl?gene=NLRP3
GLRX2	Glutaredoxin 2	Protein Coding	Q9NS18	46	GC01M193065	8.80646	https://www.genecards.org/cgi-bin/carddisp.pl?gene=GLRX2
ACE	Angiotensin I Converting Enzyme	Protein Coding	P12821	60	GC17P063477	8.80111	https://www.genecards.org/cgi-bin/carddisp.pl?gene=ACE
HMGB1	High Mobility Group Box 1	Protein Coding	P09429	57	GC13M030456	8.77708	https://www.genecards.org/cgi-bin/carddisp.pl?gene=HMGB1
PRKCG	Protein Kinase C Gamma	Protein Coding	P05129	59	GC19P053879	8.77481	https://www.genecards.org/cgi-bin/carddisp.pl?gene=PRKCG
HSPA5	Heat Shock Protein Family A (Hsp70) Member 5	Protein Coding	P11021	58	GC09M125234	8.67915	https://www.genecards.org/cgi-bin/carddisp.pl?gene=HSPA5
JUND	JunD Proto-Oncogene, AP-1 Transcription Factor Subunit	Protein Coding	P17535	51	GC19M018279	8.65469	https://www.genecards.org/cgi-bin/carddisp.pl?gene=JUND
TERT	Telomerase Reverse Transcriptase	Protein Coding	O14746	60	GC05M001253	8.56012	https://www.genecards.org/cgi-bin/carddisp.pl?gene=TERT
RPS6KA5	Ribosomal Protein S6 Kinase A5	Protein Coding	O75582	55	GC14M090847	8.54018	https://www.genecards.org/cgi-bin/carddisp.pl?gene=RPS6KA5
DHCR24	24-Dehydrocholesterol Reductase	Protein Coding	Q15392	53	GC01M054849	8.53273	https://www.genecards.org/cgi-bin/carddisp.pl?gene=DHCR24
MAP2K6	Mitogen-Activated Protein Kinase Kinase 6	Protein Coding	P52564	55	GC17P069414	8.51012	https://www.genecards.org/cgi-bin/carddisp.pl?gene=MAP2K6
NR2C2	Nuclear Receptor Subfamily 2 Group C Member 2	Protein Coding	P49116	48	GC03P014947	8.49651	https://www.genecards.org/cgi-bin/carddisp.pl?gene=NR2C2
ICAM1	Intercellular Adhesion Molecule 1	Protein Coding	P05362	59	GC19P112296	8.46099	https://www.genecards.org/cgi-bin/carddisp.pl?gene=ICAM1
LEP	Leptin	Protein Coding	P41159	55	GC07P128241	8.44791	https://www.genecards.org/cgi-bin/carddisp.pl?gene=LEP
IL1B	Interleukin 1 Beta	Protein Coding	P01584	56	GC02M112829	8.43225	https://www.genecards.org/cgi-bin/carddisp.pl?gene=IL1B
OXR1	Oxidation Resistance 1	Protein Coding	Q8N573	47	GC08P106282	8.43193	https://www.genecards.org/cgi-bin/carddisp.pl?gene=OXR1
GSS	Glutathione Synthetase	Protein Coding	P48637	54	GC20M034928	8.39734	https://www.genecards.org/cgi-bin/carddisp.pl?gene=GSS
VCAM1	Vascular Cell Adhesion Molecule 1	Protein Coding	P19320	55	GC01P100719	8.39253	https://www.genecards.org/cgi-bin/carddisp.pl?gene=VCAM1
CDKN1A	Cyclin Dependent Kinase Inhibitor 1A	Protein Coding	P38936	58	GC06P134985	8.37964	https://www.genecards.org/cgi-bin/carddisp.pl?gene=CDKN1A
MAPT	Microtubule Associated Protein Tau	Protein Coding	P10636	59	GC17P045894	8.34152	https://www.genecards.org/cgi-bin/carddisp.pl?gene=MAPT
EDN1	Endothelin 1	Protein Coding	P05305	58	GC06P012236	8.30797	https://www.genecards.org/cgi-bin/carddisp.pl?gene=EDN1
EGFR	Epidermal Growth Factor Receptor	Protein Coding	P00533	63	GC07P055019	8.29151	https://www.genecards.org/cgi-bin/carddisp.pl?gene=EGFR
HSPA8	Heat Shock Protein Family A (Hsp70) Member 8	Protein Coding	P11142	58	GC11M123057	8.25852	https://www.genecards.org/cgi-bin/carddisp.pl?gene=HSPA8
GSTM3	Glutathione S-Transferase Mu 3	Protein Coding	P21266	54	GC01M109733	8.24938	https://www.genecards.org/cgi-bin/carddisp.pl?gene=GSTM3
BCL2L11	BCL2 Like 11	Protein Coding	O43521	53	GC02P111119	8.23503	https://www.genecards.org/cgi-bin/carddisp.pl?gene=BCL2L11
NFE2L1	NFE2 Like BZIP Transcription Factor 1	Protein Coding	Q14494	48	GC17P112546	8.21422	https://www.genecards.org/cgi-bin/carddisp.pl?gene=NFE2L1
KRAS	KRAS Proto-Oncogene, GTPase	Protein Coding	P01116	61	GC12M029682	8.21356	https://www.genecards.org/cgi-bin/carddisp.pl?gene=KRAS
NRF1	Nuclear Respiratory Factor 1	Protein Coding	Q16656	53	GC07P129611	8.19639	https://www.genecards.org/cgi-bin/carddisp.pl?gene=NRF1
BACH1	BTB Domain And CNC Homolog 1	Protein Coding	O14867	48	GC21P029194	8.1931	https://www.genecards.org/cgi-bin/carddisp.pl?gene=BACH1
MAPK9	Mitogen-Activated Protein Kinase 9	Protein Coding	P45984	57	GC05M180309	8.19184	https://www.genecards.org/cgi-bin/carddisp.pl?gene=MAPK9
SERPINE1	Serpin Family E Member 1	Protein Coding	P05121	59	GC07P101127	8.16395	https://www.genecards.org/cgi-bin/carddisp.pl?gene=SERPINE1
STUB1	STIP1 Homology And U-Box Containing Protein 1	Protein Coding	Q9UNE7	54	GC16P080174	8.14629	https://www.genecards.org/cgi-bin/carddisp.pl?gene=STUB1
PRKD2	Protein Kinase D2	Protein Coding	Q9BZL6	53	GC19M046674	8.10048	https://www.genecards.org/cgi-bin/carddisp.pl?gene=PRKD2
STK24	Serine/Threonine Kinase 24	Protein Coding	Q9Y6E0	52	GC13M098445	8.09812	https://www.genecards.org/cgi-bin/carddisp.pl?gene=STK24
SESN2	Sestrin 2	Protein Coding	P58004	45	GC01P042149	8.08903	https://www.genecards.org/cgi-bin/carddisp.pl?gene=SESN2
PSEN1	Presenilin 1	Protein Coding	P49768	61	GC14P073136	7.98672	https://www.genecards.org/cgi-bin/carddisp.pl?gene=PSEN1
GCLM	Glutamate-Cysteine Ligase Modifier Subunit	Protein Coding	P48507	50	GC01M093885	7.97083	https://www.genecards.org/cgi-bin/carddisp.pl?gene=GCLM
RAC1	Rac Family Small GTPase 1	Protein Coding	P63000	58	GC07P011586	7.95858	https://www.genecards.org/cgi-bin/carddisp.pl?gene=RAC1
STAT3	Signal Transducer And Activator Of Transcription 3	Protein Coding	P40763	62	GC17M042313	7.94485	https://www.genecards.org/cgi-bin/carddisp.pl?gene=STAT3
IL18	Interleukin 18	Protein Coding	Q14116	53	GC11M112143	7.94396	https://www.genecards.org/cgi-bin/carddisp.pl?gene=IL18
LRRK2	Leucine Rich Repeat Kinase 2	Protein Coding	Q5S007	58	GC12P040196	7.87927	https://www.genecards.org/cgi-bin/carddisp.pl?gene=LRRK2
NGB	Neuroglobin	Protein Coding	Q9NPG2	45	GC14M077265	7.86331	https://www.genecards.org/cgi-bin/carddisp.pl?gene=NGB
MAOA	Monoamine Oxidase A	Protein Coding	P21397	58	GC0XP043654	7.83647	https://www.genecards.org/cgi-bin/carddisp.pl?gene=MAOA
TNFAIP8L1	TNF Alpha Induced Protein 8 Like 1	Protein Coding	Q8WVP5	36	GC19P004639	7.79167	https://www.genecards.org/cgi-bin/carddisp.pl?gene=TNFAIP8L1
BAD	BCL2 Associated Agonist Of Cell Death	Protein Coding	Q92934	53	GC11M125317	7.78347	https://www.genecards.org/cgi-bin/carddisp.pl?gene=BAD
HBG2	Hemoglobin Subunit Gamma 2	Protein Coding	P69892	50	GC11M012035	7.73328	https://www.genecards.org/cgi-bin/carddisp.pl?gene=HBG2
CASP8	Caspase 8	Protein Coding	Q14790	61	GC02P201233	7.70438	https://www.genecards.org/cgi-bin/carddisp.pl?gene=CASP8
TRAF6	TNF Receptor Associated Factor 6	Protein Coding	Q9Y4K3	55	GC11M036467	7.69728	https://www.genecards.org/cgi-bin/carddisp.pl?gene=TRAF6
PIK3CG	Phosphatidylinositol-4,5-Bisphosphate 3-Kinase Catalytic Subunit Gamma	Protein Coding	P48736	58	GC07P106865	7.69699	https://www.genecards.org/cgi-bin/carddisp.pl?gene=PIK3CG
MTOR	Mechanistic Target Of Rapamycin Kinase	Protein Coding	P42345	64	GC01M011106	7.69075	https://www.genecards.org/cgi-bin/carddisp.pl?gene=MTOR
CTNNB1	Catenin Beta 1	Protein Coding	P35222	62	GC03P041194	7.67212	https://www.genecards.org/cgi-bin/carddisp.pl?gene=CTNNB1
SCARA3	Scavenger Receptor Class A Member 3	Protein Coding	Q6AZY7	43	GC08P027633	7.6466	https://www.genecards.org/cgi-bin/carddisp.pl?gene=SCARA3
SELENOP	Selenoprotein P	Protein Coding	P49908	45	GC05M042800	7.59467	https://www.genecards.org/cgi-bin/carddisp.pl?gene=SELENOP
CAMK2G	Calcium/Calmodulin Dependent Protein Kinase II Gamma	Protein Coding	Q13555	58	GC10M073812	7.59368	https://www.genecards.org/cgi-bin/carddisp.pl?gene=CAMK2G
XRCC1	X-Ray Repair Cross Complementing 1	Protein Coding	P18887	54	GC19M043543	7.56545	https://www.genecards.org/cgi-bin/carddisp.pl?gene=XRCC1
GSTA1	Glutathione S-Transferase Alpha 1	Protein Coding	P08263	50	GC06M052791	7.55338	https://www.genecards.org/cgi-bin/carddisp.pl?gene=GSTA1
AKR1B1	Aldo-Keto Reductase Family 1 Member B	Protein Coding	P15121	56	GC07M134442	7.5338	https://www.genecards.org/cgi-bin/carddisp.pl?gene=AKR1B1
PPIF	Peptidylprolyl Isomerase F	Protein Coding	P30405	53	GC10P109251	7.52456	https://www.genecards.org/cgi-bin/carddisp.pl?gene=PPIF
NDUFS4	NADH:Ubiquinone Oxidoreductase Subunit S4	Protein Coding	O43181	51	GC05P053560	7.41691	https://www.genecards.org/cgi-bin/carddisp.pl?gene=NDUFS4
MMP9	Matrix Metallopeptidase 9	Protein Coding	P14780	62	GC20P046008	7.41473	https://www.genecards.org/cgi-bin/carddisp.pl?gene=MMP9
RAF1	Raf-1 Proto-Oncogene, Serine/Threonine Kinase	Protein Coding	P04049	63	GC03M012583	7.38654	https://www.genecards.org/cgi-bin/carddisp.pl?gene=RAF1
MAPKAPK3	MAPK Activated Protein Kinase 3	Protein Coding	Q16644	56	GC03P050611	7.37135	https://www.genecards.org/cgi-bin/carddisp.pl?gene=MAPKAPK3
PRKAA1	Protein Kinase AMP-Activated Catalytic Subunit Alpha 1	Protein Coding	Q13131	55	GC05M040759	7.32704	https://www.genecards.org/cgi-bin/carddisp.pl?gene=PRKAA1
MAPK11	Mitogen-Activated Protein Kinase 11	Protein Coding	Q15759	54	GC22M050263	7.31854	https://www.genecards.org/cgi-bin/carddisp.pl?gene=MAPK11
DAXX	Death Domain Associated Protein	Protein Coding	Q9UER7	52	GC06M033318	7.28959	https://www.genecards.org/cgi-bin/carddisp.pl?gene=DAXX
BRF2	BRF2 RNA Polymerase III Transcription Initiation Factor Subunit	Protein Coding	Q9HAW0	43	GC08M037843	7.27009	https://www.genecards.org/cgi-bin/carddisp.pl?gene=BRF2
RPS27A	Ribosomal Protein S27a	Protein Coding	P62979	52	GC02P055231	7.26996	https://www.genecards.org/cgi-bin/carddisp.pl?gene=RPS27A
FOSB	FosB Proto-Oncogene, AP-1 Transcription Factor Subunit	Protein Coding	P53539	49	GC19P045467	7.26903	https://www.genecards.org/cgi-bin/carddisp.pl?gene=FOSB
MAP2K7	Mitogen-Activated Protein Kinase Kinase 7	Protein Coding	O14733	55	GC19P007903	7.21942	https://www.genecards.org/cgi-bin/carddisp.pl?gene=MAP2K7
DUSP1	Dual Specificity Phosphatase 1	Protein Coding	P28562	54	GC05M172768	7.21717	https://www.genecards.org/cgi-bin/carddisp.pl?gene=DUSP1
MTHFR	Methylenetetrahydrofolate Reductase	Protein Coding	P42898	56	GC01M011785	7.19399	https://www.genecards.org/cgi-bin/carddisp.pl?gene=MTHFR
VWF	Von Willebrand Factor	Protein Coding	P04275	56	GC12M029229	7.18953	https://www.genecards.org/cgi-bin/carddisp.pl?gene=VWF
XBP1	X-Box Binding Protein 1	Protein Coding	P17861	55	GC22M028794	7.18815	https://www.genecards.org/cgi-bin/carddisp.pl?gene=XBP1
SESN1	Sestrin 1	Protein Coding	Q9Y6P5	45	GC06M108986	7.18158	https://www.genecards.org/cgi-bin/carddisp.pl?gene=SESN1
CYP1B1	Cytochrome P450 Family 1 Subfamily B Member 1	Protein Coding	Q16678	56	GC02M038066	7.1643	https://www.genecards.org/cgi-bin/carddisp.pl?gene=CYP1B1
HMOX2	Heme Oxygenase 2	Protein Coding	P30519	54	GC16P004474	7.14363	https://www.genecards.org/cgi-bin/carddisp.pl?gene=HMOX2
BRCA1	BRCA1 DNA Repair Associated	Protein Coding	P38398	59	GC17M043044	7.13504	https://www.genecards.org/cgi-bin/carddisp.pl?gene=BRCA1
ABL2	ABL Proto-Oncogene 2, Non-Receptor Tyrosine Kinase	Protein Coding	P42684	51	GC01M179171	7.1285	https://www.genecards.org/cgi-bin/carddisp.pl?gene=ABL2
BAK1	BCL2 Antagonist/Killer 1	Protein Coding	Q16611	53	GC06M033572	7.09131	https://www.genecards.org/cgi-bin/carddisp.pl?gene=BAK1
EIF2S1	Eukaryotic Translation Initiation Factor 2 Subunit Alpha	Protein Coding	P05198	54	GC14P067359	7.07478	https://www.genecards.org/cgi-bin/carddisp.pl?gene=EIF2S1
OLR1	Oxidized Low Density Lipoprotein Receptor 1	Protein Coding	P78380	51	GC12M029495	7.07049	https://www.genecards.org/cgi-bin/carddisp.pl?gene=OLR1
AGT	Angiotensinogen	Protein Coding	P01019	58	GC01M230690	7.03405	https://www.genecards.org/cgi-bin/carddisp.pl?gene=AGT
BACH2	BTB Domain And CNC Homolog 2	Protein Coding	Q9BYV9	51	GC06M089926	7.0333	https://www.genecards.org/cgi-bin/carddisp.pl?gene=BACH2
HP	Haptoglobin	Protein Coding	P00738	54	GC16P083106	7.01728	https://www.genecards.org/cgi-bin/carddisp.pl?gene=HP
HFE	Homeostatic Iron Regulator	Protein Coding	Q30201	54	GC06P026087	6.99232	https://www.genecards.org/cgi-bin/carddisp.pl?gene=HFE
HSP90AA1	Heat Shock Protein 90 Alpha Family Class A Member 1	Protein Coding	P07900	60	GC14M102080	6.98892	https://www.genecards.org/cgi-bin/carddisp.pl?gene=HSP90AA1
DAPK1	Death Associated Protein Kinase 1	Protein Coding	P53355	57	GC09P087497	6.95075	https://www.genecards.org/cgi-bin/carddisp.pl?gene=DAPK1
VNN1	Vanin 1	Protein Coding	O95497	52	GC06M132680	6.92497	https://www.genecards.org/cgi-bin/carddisp.pl?gene=VNN1
STK4	Serine/Threonine Kinase 4	Protein Coding	Q13043	57	GC20P044966	6.90026	https://www.genecards.org/cgi-bin/carddisp.pl?gene=STK4
MAP2K3	Mitogen-Activated Protein Kinase Kinase 3	Protein Coding	P46734	56	GC17P111656	6.89925	https://www.genecards.org/cgi-bin/carddisp.pl?gene=MAP2K3
GSTA2	Glutathione S-Transferase Alpha 2	Protein Coding	P09210	43	GC06M052750	6.8838	https://www.genecards.org/cgi-bin/carddisp.pl?gene=GSTA2
PTEN	Phosphatase And Tensin Homolog	Protein Coding	P60484	61	GC10P109367	6.87492	https://www.genecards.org/cgi-bin/carddisp.pl?gene=PTEN
SLC17A5	Solute Carrier Family 17 Member 5	Protein Coding	Q9NRA2	54	GC06M073593	6.86437	https://www.genecards.org/cgi-bin/carddisp.pl?gene=SLC17A5
ENC1	Ectodermal-Neural Cortex 1	Protein Coding	O14682	46	GC05M074627	6.82525	https://www.genecards.org/cgi-bin/carddisp.pl?gene=ENC1
FTL	Ferritin Light Chain	Protein Coding	P02792	55	GC19P048965	6.81561	https://www.genecards.org/cgi-bin/carddisp.pl?gene=FTL
MAP2K1	Mitogen-Activated Protein Kinase Kinase 1	Protein Coding	Q02750	63	GC15P066386	6.8053	https://www.genecards.org/cgi-bin/carddisp.pl?gene=MAP2K1
TARDBP	TAR DNA Binding Protein	Protein Coding	Q13148	56	GC01P039670	6.79195	https://www.genecards.org/cgi-bin/carddisp.pl?gene=TARDBP
EPO	Erythropoietin	Protein Coding	P01588	52	GC07P100720	6.79029	https://www.genecards.org/cgi-bin/carddisp.pl?gene=EPO
AHR	Aryl Hydrocarbon Receptor	Protein Coding	P35869	55	GC07P016916	6.77388	https://www.genecards.org/cgi-bin/carddisp.pl?gene=AHR
FAS	Fas Cell Surface Death Receptor	Protein Coding	P25445	59	GC10P109381	6.75672	https://www.genecards.org/cgi-bin/carddisp.pl?gene=FAS
VKORC1L1	Vitamin K Epoxide Reductase Complex Subunit 1 Like 1	Protein Coding	Q8N0U8	44	GC07P086000	6.75661	https://www.genecards.org/cgi-bin/carddisp.pl?gene=VKORC1L1
IL10	Interleukin 10	Protein Coding	P22301	56	GC01M206767	6.75184	https://www.genecards.org/cgi-bin/carddisp.pl?gene=IL10
AIFM1	Apoptosis Inducing Factor Mitochondria Associated 1	Protein Coding	O95831	59	GC0XM130129	6.75129	https://www.genecards.org/cgi-bin/carddisp.pl?gene=AIFM1
GPX8	Glutathione Peroxidase 8 (Putative)	Protein Coding	Q8TED1	47	GC05P055160	6.73811	https://www.genecards.org/cgi-bin/carddisp.pl?gene=GPX8
CLU	Clusterin	Protein Coding	P10909	56	GC08M027596	6.71594	https://www.genecards.org/cgi-bin/carddisp.pl?gene=CLU
TUG1	Taurine Up-Regulated 1	Protein Coding	A0A6I8PU40	32	GC22P030969	6.71142	https://www.genecards.org/cgi-bin/carddisp.pl?gene=TUG1
ALAD	Aminolevulinate Dehydratase	Protein Coding	P13716	55	GC09M113386	6.69474	https://www.genecards.org/cgi-bin/carddisp.pl?gene=ALAD
TLR4	Toll Like Receptor 4	Protein Coding	O00206	60	GC09P117704	6.61876	https://www.genecards.org/cgi-bin/carddisp.pl?gene=TLR4
ALDH2	Aldehyde Dehydrogenase 2 Family Member	Protein Coding	P05091	59	GC12P111766	6.60646	https://www.genecards.org/cgi-bin/carddisp.pl?gene=ALDH2
MB	Myoglobin	Protein Coding	P02144	54	GC22M035606	6.58739	https://www.genecards.org/cgi-bin/carddisp.pl?gene=MB
SENP3	SUMO Specific Peptidase 3	Protein Coding	Q9H4L4	44	GC17P111186	6.58158	https://www.genecards.org/cgi-bin/carddisp.pl?gene=SENP3
SLC1A1	Solute Carrier Family 1 Member 1	Protein Coding	P43005	58	GC09P004490	6.57872	https://www.genecards.org/cgi-bin/carddisp.pl?gene=SLC1A1
HSPD1	Heat Shock Protein Family D (Hsp60) Member 1	Protein Coding	P10809	58	GC02M197486	6.57316	https://www.genecards.org/cgi-bin/carddisp.pl?gene=HSPD1
BACE1	Beta-Secretase 1	Protein Coding	P56817	56	GC11M117285	6.56177	https://www.genecards.org/cgi-bin/carddisp.pl?gene=BACE1
SLC4A11	Solute Carrier Family 4 Member 11	Protein Coding	Q8NBS3	47	GC20M004083	6.5463	https://www.genecards.org/cgi-bin/carddisp.pl?gene=SLC4A11
HDAC2	Histone Deacetylase 2	Protein Coding	Q92769	61	GC06M113933	6.53042	https://www.genecards.org/cgi-bin/carddisp.pl?gene=HDAC2
IFNG	Interferon Gamma	Protein Coding	P01579	59	GC12M068154	6.52514	https://www.genecards.org/cgi-bin/carddisp.pl?gene=IFNG
BMI1	BMI1 Proto-Oncogene, Polycomb Ring Finger	Protein Coding	P35226	52	GC10P022337	6.50697	https://www.genecards.org/cgi-bin/carddisp.pl?gene=BMI1
IGF1	Insulin Like Growth Factor 1	Protein Coding	P05019	57	GC12M102395	6.42413	https://www.genecards.org/cgi-bin/carddisp.pl?gene=IGF1
SIGMAR1	Sigma Non-Opioid Intracellular Receptor 1	Protein Coding	Q99720	55	GC09M034634	6.41812	https://www.genecards.org/cgi-bin/carddisp.pl?gene=SIGMAR1
ABCC1	ATP Binding Cassette Subfamily C Member 1 (ABCC1 Blood Group)	Protein Coding	P33527	56	GC16P015949	6.41218	https://www.genecards.org/cgi-bin/carddisp.pl?gene=ABCC1
PRKAA2	Protein Kinase AMP-Activated Catalytic Subunit Alpha 2	Protein Coding	P54646	58	GC01P056645	6.40338	https://www.genecards.org/cgi-bin/carddisp.pl?gene=PRKAA2
BRAF	B-Raf Proto-Oncogene, Serine/Threonine Kinase	Protein Coding	P15056	62	GC07M140773	6.37965	https://www.genecards.org/cgi-bin/carddisp.pl?gene=BRAF
PYCR1	Pyrroline-5-Carboxylate Reductase 1	Protein Coding	P32322	53	GC17M081932	6.37746	https://www.genecards.org/cgi-bin/carddisp.pl?gene=PYCR1
BDNF	Brain Derived Neurotrophic Factor	Protein Coding	P23560	58	GC11M027654	6.37656	https://www.genecards.org/cgi-bin/carddisp.pl?gene=BDNF
ERCC6	ERCC Excision Repair 6, Chromatin Remodeling Factor	Protein Coding	Q03468	54	GC10M049454	6.35948	https://www.genecards.org/cgi-bin/carddisp.pl?gene=ERCC6
PLCG1	Phospholipase C Gamma 1	Protein Coding	P19174	56	GC20P041136	6.34998	https://www.genecards.org/cgi-bin/carddisp.pl?gene=PLCG1
TRAF2	TNF Receptor Associated Factor 2	Protein Coding	Q12933	54	GC09P136881	6.3327	https://www.genecards.org/cgi-bin/carddisp.pl?gene=TRAF2
MAOB	Monoamine Oxidase B	Protein Coding	P27338	53	GC0XM043766	6.28222	https://www.genecards.org/cgi-bin/carddisp.pl?gene=MAOB
PRNP	Prion Protein (Kanno Blood Group)	Protein Coding	F7VJQ1	57	GC20P004686	6.27654	https://www.genecards.org/cgi-bin/carddisp.pl?gene=PRNP
USP9X	Ubiquitin Specific Peptidase 9 X-Linked	Protein Coding	Q93008	57	GC0XP041085	6.2723	https://www.genecards.org/cgi-bin/carddisp.pl?gene=USP9X
CD36	CD36 Molecule (CD36 Blood Group)	Protein Coding	P16671	59	GC07P080369	6.24399	https://www.genecards.org/cgi-bin/carddisp.pl?gene=CD36
GSTA4	Glutathione S-Transferase Alpha 4	Protein Coding	O15217	49	GC06M052977	6.24233	https://www.genecards.org/cgi-bin/carddisp.pl?gene=GSTA4
JAK2	Janus Kinase 2	Protein Coding	O60674	62	GC09P004985	6.24177	https://www.genecards.org/cgi-bin/carddisp.pl?gene=JAK2
RETN	Resistin	Protein Coding	Q9HD89	51	GC19P007669	6.2274	https://www.genecards.org/cgi-bin/carddisp.pl?gene=RETN
GDF15	Growth Differentiation Factor 15	Protein Coding	Q99988	52	GC19P112633	6.22558	https://www.genecards.org/cgi-bin/carddisp.pl?gene=GDF15
GSTZ1	Glutathione S-Transferase Zeta 1	Protein Coding	O43708	50	GC14P077320	6.20674	https://www.genecards.org/cgi-bin/carddisp.pl?gene=GSTZ1
FOSL1	FOS Like 1, AP-1 Transcription Factor Subunit	Protein Coding	P15407	54	GC11M125414	6.19564	https://www.genecards.org/cgi-bin/carddisp.pl?gene=FOSL1
CBS	Cystathionine Beta-Synthase	Protein Coding	P35520	60	GC21M043053	6.14847	https://www.genecards.org/cgi-bin/carddisp.pl?gene=CBS
CHKA	Choline Kinase Alpha	Protein Coding	P35790	52	GC11M068052	6.14165	https://www.genecards.org/cgi-bin/carddisp.pl?gene=CHKA
APOA1	Apolipoprotein A1	Protein Coding	P02647	59	GC11M116835	6.13249	https://www.genecards.org/cgi-bin/carddisp.pl?gene=APOA1
SELE	Selectin E	Protein Coding	P16581	53	GC01M169722	6.1306	https://www.genecards.org/cgi-bin/carddisp.pl?gene=SELE
PLCG2	Phospholipase C Gamma 2	Protein Coding	P16885	60	GC16P081779	6.10619	https://www.genecards.org/cgi-bin/carddisp.pl?gene=PLCG2
LTF	Lactotransferrin	Protein Coding	P02788	54	GC03M046435	6.0927	https://www.genecards.org/cgi-bin/carddisp.pl?gene=LTF
ERCC2	ERCC Excision Repair 2, TFIIH Core Complex Helicase Subunit	Protein Coding	P18074	56	GC19M045349	6.0595	https://www.genecards.org/cgi-bin/carddisp.pl?gene=ERCC2
CAMK2A	Calcium/Calmodulin Dependent Protein Kinase II Alpha	Protein Coding	Q9UQM7	61	GC05M150219	6.05869	https://www.genecards.org/cgi-bin/carddisp.pl?gene=CAMK2A
BMP2	Bone Morphogenetic Protein 2	Protein Coding	P12643	55	GC20P006767	6.05108	https://www.genecards.org/cgi-bin/carddisp.pl?gene=BMP2
COMT	Catechol-O-Methyltransferase	Protein Coding	P21964	60	GC22P019941	6.00812	https://www.genecards.org/cgi-bin/carddisp.pl?gene=COMT
NDRG1	N-Myc Downstream Regulated 1	Protein Coding	Q92597	54	GC08M133237	5.9966	https://www.genecards.org/cgi-bin/carddisp.pl?gene=NDRG1
CHUK	Component Of Inhibitor Of Nuclear Factor Kappa B Kinase Complex	Protein Coding	O15111	59	GC10M100415	5.97913	https://www.genecards.org/cgi-bin/carddisp.pl?gene=CHUK
RCAN1	Regulator Of Calcineurin 1	Protein Coding	P53805	52	GC21M034513	5.96242	https://www.genecards.org/cgi-bin/carddisp.pl?gene=RCAN1
ACO1	Aconitase 1	Protein Coding	P21399	52	GC09P032374	5.95914	https://www.genecards.org/cgi-bin/carddisp.pl?gene=ACO1
MUTYH	MutY DNA Glycosylase	Protein Coding	Q9UIF7	53	GC01M045329	5.93509	https://www.genecards.org/cgi-bin/carddisp.pl?gene=MUTYH
GSK3B	Glycogen Synthase Kinase 3 Beta	Protein Coding	P49841	59	GC03M119821	5.93057	https://www.genecards.org/cgi-bin/carddisp.pl?gene=GSK3B
GSTM5	Glutathione S-Transferase Mu 5	Protein Coding	P46439	49	GC01P109711	5.9257	https://www.genecards.org/cgi-bin/carddisp.pl?gene=GSTM5
ABCD1	ATP Binding Cassette Subfamily D Member 1	Protein Coding	P33897	54	GC0XP153724	5.91086	https://www.genecards.org/cgi-bin/carddisp.pl?gene=ABCD1
CCS	Copper Chaperone For Superoxide Dismutase	Protein Coding	O14618	51	GC11P066593	5.9073	https://www.genecards.org/cgi-bin/carddisp.pl?gene=CCS
ALOX5	Arachidonate 5-Lipoxygenase	Protein Coding	P09917	57	GC10P045374	5.89689	https://www.genecards.org/cgi-bin/carddisp.pl?gene=ALOX5
TFRC	Transferrin Receptor	Protein Coding	P02786	59	GC03M196303	5.88733	https://www.genecards.org/cgi-bin/carddisp.pl?gene=TFRC
PCNA	Proliferating Cell Nuclear Antigen	Protein Coding	P12004	59	GC20M005114	5.86202	https://www.genecards.org/cgi-bin/carddisp.pl?gene=PCNA
AKR1A1	Aldo-Keto Reductase Family 1 Member A1	Protein Coding	P14550	53	GC01P045550	5.86096	https://www.genecards.org/cgi-bin/carddisp.pl?gene=AKR1A1
YWHAQ	Tyrosine 3-Monooxygenase/Tryptophan 5-Monooxygenase Activation Protein Theta	Protein Coding	P27348	55	GC02M009583	5.84741	https://www.genecards.org/cgi-bin/carddisp.pl?gene=YWHAQ
ADNP2	ADNP Homeobox 2	Protein Coding	Q6IQ32	40	GC18P080109	5.84668	https://www.genecards.org/cgi-bin/carddisp.pl?gene=ADNP2
H2AX	H2A.X Variant Histone	Protein Coding	P16104	53	GC11M126556	5.84564	https://www.genecards.org/cgi-bin/carddisp.pl?gene=H2AX
GPT	Glutamic--Pyruvic Transaminase	Protein Coding	P24298	51	GC08P144502	5.83974	https://www.genecards.org/cgi-bin/carddisp.pl?gene=GPT
NTHL1	Nth Like DNA Glycosylase 1	Protein Coding	P78549	52	GC16M020307	5.82637	https://www.genecards.org/cgi-bin/carddisp.pl?gene=NTHL1
GSTM4	Glutathione S-Transferase Mu 4	Protein Coding	Q03013	44	GC01P109697	5.82269	https://www.genecards.org/cgi-bin/carddisp.pl?gene=GSTM4
SGK1	Serum/Glucocorticoid Regulated Kinase 1	Protein Coding	O00141	58	GC06M134169	5.81775	https://www.genecards.org/cgi-bin/carddisp.pl?gene=SGK1
ARRB2	Arrestin Beta 2	Protein Coding	P32121	54	GC17P111039	5.81251	https://www.genecards.org/cgi-bin/carddisp.pl?gene=ARRB2
NEIL1	Nei Like DNA Glycosylase 1	Protein Coding	Q96FI4	46	GC15P075346	5.78093	https://www.genecards.org/cgi-bin/carddisp.pl?gene=NEIL1
YWHAG	Tyrosine 3-Monooxygenase/Tryptophan 5-Monooxygenase Activation Protein Gamma	Protein Coding	P61981	56	GC07M078603	5.7756	https://www.genecards.org/cgi-bin/carddisp.pl?gene=YWHAG
PPARA	Peroxisome Proliferator Activated Receptor Alpha	Protein Coding	Q07869	53	GC22P046150	5.77169	https://www.genecards.org/cgi-bin/carddisp.pl?gene=PPARA
CDK4	Cyclin Dependent Kinase 4	Protein Coding	P11802	62	GC12M059354	5.74975	https://www.genecards.org/cgi-bin/carddisp.pl?gene=CDK4
MYC	MYC Proto-Oncogene, BHLH Transcription Factor	Protein Coding	P01106	61	GC08P127735	5.73888	https://www.genecards.org/cgi-bin/carddisp.pl?gene=MYC
HDAC1	Histone Deacetylase 1	Protein Coding	Q13547	59	GC01P032292	5.69182	https://www.genecards.org/cgi-bin/carddisp.pl?gene=HDAC1
SLC2A1	Solute Carrier Family 2 Member 1	Protein Coding	P11166	62	GC01M042925	5.65455	https://www.genecards.org/cgi-bin/carddisp.pl?gene=SLC2A1
XRCC3	X-Ray Repair Cross Complementing 3	Protein Coding	O43542	51	GC14M103697	5.65185	https://www.genecards.org/cgi-bin/carddisp.pl?gene=XRCC3
CTSD	Cathepsin D	Protein Coding	P07339	61	GC11M001752	5.64877	https://www.genecards.org/cgi-bin/carddisp.pl?gene=CTSD
EEF1A1	Eukaryotic Translation Elongation Factor 1 Alpha 1	Protein Coding	P68104	52	GC06M094314	5.63637	https://www.genecards.org/cgi-bin/carddisp.pl?gene=EEF1A1
PLA2G6	Phospholipase A2 Group VI	Protein Coding	O60733	55	GC22M078732	5.63298	https://www.genecards.org/cgi-bin/carddisp.pl?gene=PLA2G6
PEPD	Peptidase D	Protein Coding	P12955	54	GC19M033386	5.62157	https://www.genecards.org/cgi-bin/carddisp.pl?gene=PEPD
CUL3	Cullin 3	Protein Coding	Q13618	57	GC02M224470	5.61706	https://www.genecards.org/cgi-bin/carddisp.pl?gene=CUL3
CERKL	Ceramide Kinase Like	Protein Coding	Q49MI3	46	GC02M181536	5.61466	https://www.genecards.org/cgi-bin/carddisp.pl?gene=CERKL
SFPQ	Splicing Factor Proline And Glutamine Rich	Protein Coding	P23246	52	GC01M035176	5.61039	https://www.genecards.org/cgi-bin/carddisp.pl?gene=SFPQ
ATG4D	Autophagy Related 4D Cysteine Peptidase	Protein Coding	Q86TL0	41	GC19P010543	5.5991	https://www.genecards.org/cgi-bin/carddisp.pl?gene=ATG4D
AKR1C1	Aldo-Keto Reductase Family 1 Member C1	Protein Coding	Q04828	52	GC10P004963	5.58755	https://www.genecards.org/cgi-bin/carddisp.pl?gene=AKR1C1
ARRB1	Arrestin Beta 1	Protein Coding	P49407	53	GC11M125753	5.58143	https://www.genecards.org/cgi-bin/carddisp.pl?gene=ARRB1
RELA	RELA Proto-Oncogene, NF-KB Subunit	Protein Coding	Q04206	60	GC11M065653	5.57013	https://www.genecards.org/cgi-bin/carddisp.pl?gene=RELA
NFKBIA	NFKB Inhibitor Alpha	Protein Coding	P25963	59	GC14M035401	5.56877	https://www.genecards.org/cgi-bin/carddisp.pl?gene=NFKBIA
HSPA1B	Heat Shock Protein Family A (Hsp70) Member 1B	Protein Coding	P0DMV9	46	GC06P134837	5.56742	https://www.genecards.org/cgi-bin/carddisp.pl?gene=HSPA1B
PKD1	Polycystin 1, Transient Receptor Potential Channel Interacting	Protein Coding	P98161	54	GC16M020311	5.56298	https://www.genecards.org/cgi-bin/carddisp.pl?gene=PKD1
ESR1	Estrogen Receptor 1	Protein Coding	P03372	62	GC06P151656	5.55541	https://www.genecards.org/cgi-bin/carddisp.pl?gene=ESR1
GSTM2	Glutathione S-Transferase Mu 2	Protein Coding	P28161	50	GC01P109668	5.55399	https://www.genecards.org/cgi-bin/carddisp.pl?gene=GSTM2
SERPINF1	Serpin Family F Member 1	Protein Coding	P36955	54	GC17P110885	5.51638	https://www.genecards.org/cgi-bin/carddisp.pl?gene=SERPINF1
NR3C1	Nuclear Receptor Subfamily 3 Group C Member 1	Protein Coding	P04150	58	GC05M143277	5.51009	https://www.genecards.org/cgi-bin/carddisp.pl?gene=NR3C1
COX5A	Cytochrome C Oxidase Subunit 5A	Protein Coding	P20674	53	GC15M074919	5.50883	https://www.genecards.org/cgi-bin/carddisp.pl?gene=COX5A
DNM1L	Dynamin 1 Like	Protein Coding	O00429	57	GC12P032679	5.50435	https://www.genecards.org/cgi-bin/carddisp.pl?gene=DNM1L
KL	Klotho	Protein Coding	Q9UEF7	56	GC13P033016	5.50371	https://www.genecards.org/cgi-bin/carddisp.pl?gene=KL
GPX2	Glutathione Peroxidase 2	Protein Coding	P18283	50	GC14M064939	5.48376	https://www.genecards.org/cgi-bin/carddisp.pl?gene=GPX2
ERMP1	Endoplasmic Reticulum Metallopeptidase 1	Protein Coding	Q7Z2K6	38	GC09M005749	5.46078	https://www.genecards.org/cgi-bin/carddisp.pl?gene=ERMP1
GLO1	Glyoxalase I	Protein Coding	Q04760	54	GC06M093944	5.45545	https://www.genecards.org/cgi-bin/carddisp.pl?gene=GLO1
BECN1	Beclin 1	Protein Coding	Q14457	55	GC17M042810	5.45523	https://www.genecards.org/cgi-bin/carddisp.pl?gene=BECN1
GSTO1	Glutathione S-Transferase Omega 1	Protein Coding	P78417	53	GC10P104235	5.4385	https://www.genecards.org/cgi-bin/carddisp.pl?gene=GSTO1
E2F1	E2F Transcription Factor 1	Protein Coding	Q01094	53	GC20M033675	5.42272	https://www.genecards.org/cgi-bin/carddisp.pl?gene=E2F1
UBC	Ubiquitin C	Protein Coding	P0CG48	53	GC12M124911	5.41905	https://www.genecards.org/cgi-bin/carddisp.pl?gene=UBC
MICB	MHC Class I Polypeptide-Related Sequence B	Protein Coding	Q29980	49	GC06P134815	5.41684	https://www.genecards.org/cgi-bin/carddisp.pl?gene=MICB
CASP7	Caspase 7	Protein Coding	P55210	58	GC10P113679	5.41429	https://www.genecards.org/cgi-bin/carddisp.pl?gene=CASP7
BMP6	Bone Morphogenetic Protein 6	Protein Coding	P22004	53	GC06P007726	5.40699	https://www.genecards.org/cgi-bin/carddisp.pl?gene=BMP6
SREBF1	Sterol Regulatory Element Binding Transcription Factor 1	Protein Coding	P36956	58	GC17M017810	5.40082	https://www.genecards.org/cgi-bin/carddisp.pl?gene=SREBF1
FOXM1	Forkhead Box M1	Protein Coding	Q08050	52	GC12M002857	5.38068	https://www.genecards.org/cgi-bin/carddisp.pl?gene=FOXM1
NR4A2	Nuclear Receptor Subfamily 4 Group A Member 2	Protein Coding	P43354	54	GC02M156324	5.37824	https://www.genecards.org/cgi-bin/carddisp.pl?gene=NR4A2
MMP1	Matrix Metallopeptidase 1	Protein Coding	P03956	59	GC11M126178	5.37813	https://www.genecards.org/cgi-bin/carddisp.pl?gene=MMP1
LONP1	Lon Peptidase 1, Mitochondrial	Protein Coding	P36776	54	GC19M005691	5.37752	https://www.genecards.org/cgi-bin/carddisp.pl?gene=LONP1
TAT	Tyrosine Aminotransferase	Protein Coding	P17735	54	GC16M071565	5.35786	https://www.genecards.org/cgi-bin/carddisp.pl?gene=TAT
CRYAB	Crystallin Alpha B	Protein Coding	P02511	55	GC11M111908	5.32892	https://www.genecards.org/cgi-bin/carddisp.pl?gene=CRYAB
PLA2G2A	Phospholipase A2 Group IIA	Protein Coding	P14555	55	GC01M019975	5.32382	https://www.genecards.org/cgi-bin/carddisp.pl?gene=PLA2G2A
SMAD3	SMAD Family Member 3	Protein Coding	P84022	61	GC15P067063	5.32342	https://www.genecards.org/cgi-bin/carddisp.pl?gene=SMAD3
DCD	Dermcidin	Protein Coding	P81605	43	GC12M054644	5.31991	https://www.genecards.org/cgi-bin/carddisp.pl?gene=DCD
NPPB	Natriuretic Peptide B	Protein Coding	P16860	52	GC01M014525	5.31114	https://www.genecards.org/cgi-bin/carddisp.pl?gene=NPPB
UCP3	Uncoupling Protein 3	Protein Coding	P55916	51	GC11M074000	5.29246	https://www.genecards.org/cgi-bin/carddisp.pl?gene=UCP3
POLG	DNA Polymerase Gamma, Catalytic Subunit	Protein Coding	P54098	56	GC15M148631	5.28526	https://www.genecards.org/cgi-bin/carddisp.pl?gene=POLG
SLC11A2	Solute Carrier Family 11 Member 2	Protein Coding	P49281	57	GC12M050952	5.2797	https://www.genecards.org/cgi-bin/carddisp.pl?gene=SLC11A2
AIFM2	Apoptosis Inducing Factor Mitochondria Associated 2	Protein Coding	Q9BRQ8	44	GC10M070098	5.27833	https://www.genecards.org/cgi-bin/carddisp.pl?gene=AIFM2
HBB	Hemoglobin Subunit Beta	Protein Coding	P68871	54	GC11M012029	5.27574	https://www.genecards.org/cgi-bin/carddisp.pl?gene=HBB
PPP5C	Protein Phosphatase 5 Catalytic Subunit	Protein Coding	P53041	52	GC19P113288	5.27377	https://www.genecards.org/cgi-bin/carddisp.pl?gene=PPP5C
APOB	Apolipoprotein B	Protein Coding	P04114	55	GC02M020956	5.26094	https://www.genecards.org/cgi-bin/carddisp.pl?gene=APOB
ALDH3B1	Aldehyde Dehydrogenase 3 Family Member B1	Protein Coding	P43353	47	GC11P089281	5.25339	https://www.genecards.org/cgi-bin/carddisp.pl?gene=ALDH3B1
ACHE	Acetylcholinesterase (Yt Blood Group)	Protein Coding	P22303	56	GC07M100889	5.23846	https://www.genecards.org/cgi-bin/carddisp.pl?gene=ACHE
PRKCZ	Protein Kinase C Zeta	Protein Coding	Q05513	57	GC01P020522	5.23263	https://www.genecards.org/cgi-bin/carddisp.pl?gene=PRKCZ
CFTR	CF Transmembrane Conductance Regulator	Protein Coding	P13569	61	GC07P117287	5.22692	https://www.genecards.org/cgi-bin/carddisp.pl?gene=CFTR
EIF2AK3	Eukaryotic Translation Initiation Factor 2 Alpha Kinase 3	Protein Coding	Q9NZJ5	58	GC02M088556	5.20439	https://www.genecards.org/cgi-bin/carddisp.pl?gene=EIF2AK3
URM1	Ubiquitin Related Modifier 1	Protein Coding	Q9BTM9	40	GC09P128371	5.1962	https://www.genecards.org/cgi-bin/carddisp.pl?gene=URM1
UBB	Ubiquitin B	Protein Coding	P0CG47	53	GC17P016380	5.1953	https://www.genecards.org/cgi-bin/carddisp.pl?gene=UBB
SMAD4	SMAD Family Member 4	Protein Coding	Q13485	61	GC18P051028	5.19518	https://www.genecards.org/cgi-bin/carddisp.pl?gene=SMAD4
TJP1	Tight Junction Protein 1	Protein Coding	Q07157	54	GC15M029699	5.19316	https://www.genecards.org/cgi-bin/carddisp.pl?gene=TJP1
PDLIM4	PDZ And LIM Domain 4	Protein Coding	P50479	46	GC05P132257	5.18977	https://www.genecards.org/cgi-bin/carddisp.pl?gene=PDLIM4
GSTT2	Glutathione S-Transferase Theta 2 (Gene/Pseudogene)	Protein Coding	P0CG29	37	GC22P023980	5.18801	https://www.genecards.org/cgi-bin/carddisp.pl?gene=GSTT2
TNFRSF1B	TNF Receptor Superfamily Member 1B	Protein Coding	P20333	57	GC01P040409	5.18367	https://www.genecards.org/cgi-bin/carddisp.pl?gene=TNFRSF1B
PML	PML Nuclear Body Scaffold	Protein Coding	P29590	54	GC15P073994	5.17794	https://www.genecards.org/cgi-bin/carddisp.pl?gene=PML
RNF112	Ring Finger Protein 112	Protein Coding	Q9ULX5	43	GC17P111588	5.17569	https://www.genecards.org/cgi-bin/carddisp.pl?gene=RNF112
GCK	Glucokinase	Protein Coding	P35557	58	GC07M045340	5.16884	https://www.genecards.org/cgi-bin/carddisp.pl?gene=GCK
EPHX1	Epoxide Hydrolase 1	Protein Coding	P07099	53	GC01P225810	5.14639	https://www.genecards.org/cgi-bin/carddisp.pl?gene=EPHX1
CHEK2	Checkpoint Kinase 2	Protein Coding	O96017	63	GC22M028687	5.14187	https://www.genecards.org/cgi-bin/carddisp.pl?gene=CHEK2
PTGS1	Prostaglandin-Endoperoxide Synthase 1	Protein Coding	P23219	55	GC09P122370	5.11927	https://www.genecards.org/cgi-bin/carddisp.pl?gene=PTGS1
SELENOT	Selenoprotein T	Protein Coding	P62341	40	GC03P150603	5.11347	https://www.genecards.org/cgi-bin/carddisp.pl?gene=SELENOT
TIMP1	TIMP Metallopeptidase Inhibitor 1	Protein Coding	P01033	54	GC0XP057483	5.09865	https://www.genecards.org/cgi-bin/carddisp.pl?gene=TIMP1
SLC25A27	Solute Carrier Family 25 Member 27	Protein Coding	O95847	46	GC06P046652	5.09682	https://www.genecards.org/cgi-bin/carddisp.pl?gene=SLC25A27
PIK3CA	Phosphatidylinositol-4,5-Bisphosphate 3-Kinase Catalytic Subunit Alpha	Protein Coding	P42336	61	GC03P179148	5.08829	https://www.genecards.org/cgi-bin/carddisp.pl?gene=PIK3CA
SYK	Spleen Associated Tyrosine Kinase	Protein Coding	P43405	59	GC09P099958	5.08829	https://www.genecards.org/cgi-bin/carddisp.pl?gene=SYK
OGDH	Oxoglutarate Dehydrogenase	Protein Coding	Q02218	55	GC07P044606	5.08829	https://www.genecards.org/cgi-bin/carddisp.pl?gene=OGDH
MCL1	MCL1 Apoptosis Regulator, BCL2 Family Member	Protein Coding	Q07820	56	GC01M160760	5.08115	https://www.genecards.org/cgi-bin/carddisp.pl?gene=MCL1
P4HB	Prolyl 4-Hydroxylase Subunit Beta	Protein Coding	P07237	58	GC17M081843	5.06898	https://www.genecards.org/cgi-bin/carddisp.pl?gene=P4HB
FOXC1	Forkhead Box C1	Protein Coding	Q12948	52	GC06P001635	5.05829	https://www.genecards.org/cgi-bin/carddisp.pl?gene=FOXC1
PRKCE	Protein Kinase C Epsilon	Protein Coding	Q02156	56	GC02P045651	5.0383	https://www.genecards.org/cgi-bin/carddisp.pl?gene=PRKCE
APOD	Apolipoprotein D	Protein Coding	P05090	51	GC03M195568	5.02837	https://www.genecards.org/cgi-bin/carddisp.pl?gene=APOD
CFH	Complement Factor H	Protein Coding	P08603	56	GC01P196621	5.02353	https://www.genecards.org/cgi-bin/carddisp.pl?gene=CFH
PLAU	Plasminogen Activator, Urokinase	Protein Coding	P00749	60	GC10P073909	5.02334	https://www.genecards.org/cgi-bin/carddisp.pl?gene=PLAU
H6PD	Hexose-6-Phosphate Dehydrogenase/Glucose 1-Dehydrogenase	Protein Coding	O95479	53	GC01P009234	5.02226	https://www.genecards.org/cgi-bin/carddisp.pl?gene=H6PD
HSPA9	Heat Shock Protein Family A (Hsp70) Member 9	Protein Coding	P38646	56	GC05M138554	5.00827	https://www.genecards.org/cgi-bin/carddisp.pl?gene=HSPA9
NAMPT	Nicotinamide Phosphoribosyltransferase	Protein Coding	P43490	55	GC07M106248	5.00579	https://www.genecards.org/cgi-bin/carddisp.pl?gene=NAMPT
VIM	Vimentin	Protein Coding	P08670	60	GC10P017227	4.99476	https://www.genecards.org/cgi-bin/carddisp.pl?gene=VIM
SZT2	SZT2 Subunit Of KICSTOR Complex	Protein Coding	Q5T011	44	GC01P043389	4.9902	https://www.genecards.org/cgi-bin/carddisp.pl?gene=SZT2
IRS1	Insulin Receptor Substrate 1	Protein Coding	P35568	56	GC02M226731	4.97674	https://www.genecards.org/cgi-bin/carddisp.pl?gene=IRS1
FGF7	Fibroblast Growth Factor 7	Protein Coding	P21781	52	GC15P049423	4.97598	https://www.genecards.org/cgi-bin/carddisp.pl?gene=FGF7
TFAM	Transcription Factor A, Mitochondrial	Protein Coding	Q00059	54	GC10P058385	4.96718	https://www.genecards.org/cgi-bin/carddisp.pl?gene=TFAM
THBD	Thrombomodulin	Protein Coding	P07204	55	GC20M023026	4.95116	https://www.genecards.org/cgi-bin/carddisp.pl?gene=THBD
ZC3H12A	Zinc Finger CCCH-Type Containing 12A	Protein Coding	Q5D1E8	47	GC01P037474	4.94498	https://www.genecards.org/cgi-bin/carddisp.pl?gene=ZC3H12A
TRAF3	TNF Receptor Associated Factor 3	Protein Coding	Q13114	55	GC14P115798	4.94344	https://www.genecards.org/cgi-bin/carddisp.pl?gene=TRAF3
CDC37	Cell Division Cycle 37, HSP90 Cochaperone	Protein Coding	Q16543	52	GC19M010391	4.94331	https://www.genecards.org/cgi-bin/carddisp.pl?gene=CDC37
PDK1	Pyruvate Dehydrogenase Kinase 1	Protein Coding	Q15118	55	GC02P172555	4.94109	https://www.genecards.org/cgi-bin/carddisp.pl?gene=PDK1
MSRB3	Methionine Sulfoxide Reductase B3	Protein Coding	Q8IXL7	49	GC12P065279	4.93433	https://www.genecards.org/cgi-bin/carddisp.pl?gene=MSRB3
AR	Androgen Receptor	Protein Coding	P10275	60	GC0XP067544	4.93245	https://www.genecards.org/cgi-bin/carddisp.pl?gene=AR
ETV5	ETS Variant Transcription Factor 5	Protein Coding	P41161	48	GC03M186046	4.92445	https://www.genecards.org/cgi-bin/carddisp.pl?gene=ETV5
PON3	Paraoxonase 3	Protein Coding	Q15166	53	GC07M095359	4.91625	https://www.genecards.org/cgi-bin/carddisp.pl?gene=PON3
CDKN3	Cyclin Dependent Kinase Inhibitor 3	Protein Coding	Q16667	51	GC14P054398	4.90737	https://www.genecards.org/cgi-bin/carddisp.pl?gene=CDKN3
HTRA2	HtrA Serine Peptidase 2	Protein Coding	O43464	55	GC02P074529	4.90547	https://www.genecards.org/cgi-bin/carddisp.pl?gene=HTRA2
ISCU	Iron-Sulfur Cluster Assembly Enzyme	Protein Coding	Q9H1K1	53	GC12P108561	4.89852	https://www.genecards.org/cgi-bin/carddisp.pl?gene=ISCU
NDUFV1	NADH:Ubiquinone Oxidoreductase Core Subunit V1	Protein Coding	P49821	53	GC11P089259	4.88901	https://www.genecards.org/cgi-bin/carddisp.pl?gene=NDUFV1
PTK2	Protein Tyrosine Kinase 2	Protein Coding	Q05397	56	GC08M140657	4.8886	https://www.genecards.org/cgi-bin/carddisp.pl?gene=PTK2
MT3	Metallothionein 3	Protein Coding	P25713	48	GC16P056589	4.88349	https://www.genecards.org/cgi-bin/carddisp.pl?gene=MT3
NFIX	Nuclear Factor I X	Protein Coding	Q14938	52	GC19P112456	4.8779	https://www.genecards.org/cgi-bin/carddisp.pl?gene=NFIX
HPX	Hemopexin	Protein Coding	P02790	50	GC11M012117	4.87682	https://www.genecards.org/cgi-bin/carddisp.pl?gene=HPX
CDK5	Cyclin Dependent Kinase 5	Protein Coding	Q00535	62	GC07M151053	4.8659	https://www.genecards.org/cgi-bin/carddisp.pl?gene=CDK5
PLA2G4A	Phospholipase A2 Group IVA	Protein Coding	P47712	56	GC01P186798	4.86579	https://www.genecards.org/cgi-bin/carddisp.pl?gene=PLA2G4A
HDAC9	Histone Deacetylase 9	Protein Coding	Q9UKV0	58	GC07P018086	4.86302	https://www.genecards.org/cgi-bin/carddisp.pl?gene=HDAC9
EGR1	Early Growth Response 1	Protein Coding	P18146	53	GC05P138465	4.86109	https://www.genecards.org/cgi-bin/carddisp.pl?gene=EGR1
YWHAZ	Tyrosine 3-Monooxygenase/Tryptophan 5-Monooxygenase Activation Protein Zeta	Protein Coding	P63104	54	GC08M100919	4.85782	https://www.genecards.org/cgi-bin/carddisp.pl?gene=YWHAZ
HTT	Huntingtin	Protein Coding	P42858	53	GC04P003041	4.85366	https://www.genecards.org/cgi-bin/carddisp.pl?gene=HTT
ECSIT	ECSIT Signaling Integrator	Protein Coding	Q9BQ95	47	GC19M011505	4.84956	https://www.genecards.org/cgi-bin/carddisp.pl?gene=ECSIT
ESR2	Estrogen Receptor 2	Protein Coding	Q92731	58	GC14M064084	4.82986	https://www.genecards.org/cgi-bin/carddisp.pl?gene=ESR2
MAPK13	Mitogen-Activated Protein Kinase 13	Protein Coding	O15264	55	GC06P134978	4.82962	https://www.genecards.org/cgi-bin/carddisp.pl?gene=MAPK13
IGF2BP1	Insulin Like Growth Factor 2 MRNA Binding Protein 1	Protein Coding	Q9NZI8	48	GC17P112592	4.79727	https://www.genecards.org/cgi-bin/carddisp.pl?gene=IGF2BP1
CALR	Calreticulin	Protein Coding	P27797	60	GC19P012938	4.79389	https://www.genecards.org/cgi-bin/carddisp.pl?gene=CALR
LANCL1	LanC Like Glutathione S-Transferase 1	Protein Coding	O43813	43	GC02M210431	4.79341	https://www.genecards.org/cgi-bin/carddisp.pl?gene=LANCL1
EIF2AK2	Eukaryotic Translation Initiation Factor 2 Alpha Kinase 2	Protein Coding	P19525	59	GC02M037099	4.78228	https://www.genecards.org/cgi-bin/carddisp.pl?gene=EIF2AK2
MIF	Macrophage Migration Inhibitory Factor	Protein Coding	P14174	56	GC22P023894	4.77625	https://www.genecards.org/cgi-bin/carddisp.pl?gene=MIF
GFAP	Glial Fibrillary Acidic Protein	Protein Coding	P14136	57	GC17M077883	4.77263	https://www.genecards.org/cgi-bin/carddisp.pl?gene=GFAP
TERF2	Telomeric Repeat Binding Factor 2	Protein Coding	Q15554	49	GC16M069355	4.768	https://www.genecards.org/cgi-bin/carddisp.pl?gene=TERF2
YWHAE	Tyrosine 3-Monooxygenase/Tryptophan 5-Monooxygenase Activation Protein Epsilon	Protein Coding	P62258	58	GC17M074382	4.75538	https://www.genecards.org/cgi-bin/carddisp.pl?gene=YWHAE
ATXN3	Ataxin 3	Protein Coding	P54252	55	GC14M119747	4.74973	https://www.genecards.org/cgi-bin/carddisp.pl?gene=ATXN3
PSIP1	PC4 And SRSF1 Interacting Protein 1	Protein Coding	O75475	48	GC09M015464	4.74811	https://www.genecards.org/cgi-bin/carddisp.pl?gene=PSIP1
PLAT	Plasminogen Activator, Tissue Type	Protein Coding	P00750	58	GC08M042174	4.74558	https://www.genecards.org/cgi-bin/carddisp.pl?gene=PLAT
OXA1L	OXA1L Mitochondrial Inner Membrane Protein	Protein Coding	Q15070	46	GC14P022766	4.74417	https://www.genecards.org/cgi-bin/carddisp.pl?gene=OXA1L
CDH13	Cadherin 13	Protein Coding	P55290	53	GC16P082626	4.72389	https://www.genecards.org/cgi-bin/carddisp.pl?gene=CDH13
CASP2	Caspase 2	Protein Coding	P42575	55	GC07P157914	4.71289	https://www.genecards.org/cgi-bin/carddisp.pl?gene=CASP2
RORA	RAR Related Orphan Receptor A	Protein Coding	P35398	58	GC15M060488	4.70469	https://www.genecards.org/cgi-bin/carddisp.pl?gene=RORA
PGD	Phosphogluconate Dehydrogenase	Protein Coding	P52209	55	GC01P010398	4.69934	https://www.genecards.org/cgi-bin/carddisp.pl?gene=PGD
NCF2	Neutrophil Cytosolic Factor 2	Protein Coding	P19878	54	GC01M185801	4.67911	https://www.genecards.org/cgi-bin/carddisp.pl?gene=NCF2
MAP2K2	Mitogen-Activated Protein Kinase Kinase 2	Protein Coding	P36507	63	GC19M004090	4.66822	https://www.genecards.org/cgi-bin/carddisp.pl?gene=MAP2K2
COA8	Cytochrome C Oxidase Assembly Factor 8	Protein Coding	Q96IL0	40	GC14P115881	4.66615	https://www.genecards.org/cgi-bin/carddisp.pl?gene=COA8
MBL2	Mannose Binding Lectin 2	Protein Coding	P11226	55	GC10M052760	4.66111	https://www.genecards.org/cgi-bin/carddisp.pl?gene=MBL2
SPP1	Secreted Phosphoprotein 1	Protein Coding	P10451	54	GC04P087975	4.65693	https://www.genecards.org/cgi-bin/carddisp.pl?gene=SPP1
EGF	Epidermal Growth Factor	Protein Coding	P01133	60	GC04P109912	4.65071	https://www.genecards.org/cgi-bin/carddisp.pl?gene=EGF
MCTP1	Multiple C2 And Transmembrane Domain Containing 1	Protein Coding	Q6DN14	40	GC05M094703	4.64789	https://www.genecards.org/cgi-bin/carddisp.pl?gene=MCTP1
FLT1	Fms Related Receptor Tyrosine Kinase 1	Protein Coding	P17948	59	GC13M028300	4.63745	https://www.genecards.org/cgi-bin/carddisp.pl?gene=FLT1
ELAVL1	ELAV Like RNA Binding Protein 1	Protein Coding	Q15717	50	GC19M007958	4.62817	https://www.genecards.org/cgi-bin/carddisp.pl?gene=ELAVL1
ETFDH	Electron Transfer Flavoprotein Dehydrogenase	Protein Coding	Q16134	54	GC04P158672	4.60922	https://www.genecards.org/cgi-bin/carddisp.pl?gene=ETFDH
CDK6	Cyclin Dependent Kinase 6	Protein Coding	Q00534	60	GC07M092604	4.60786	https://www.genecards.org/cgi-bin/carddisp.pl?gene=CDK6
HSP90AB1	Heat Shock Protein 90 Alpha Family Class B Member 1	Protein Coding	P08238	58	GC06P044246	4.59585	https://www.genecards.org/cgi-bin/carddisp.pl?gene=HSP90AB1
SLC23A2	Solute Carrier Family 23 Member 2	Protein Coding	Q9UGH3	50	GC20M004852	4.58965	https://www.genecards.org/cgi-bin/carddisp.pl?gene=SLC23A2
NLRX1	NLR Family Member X1	Protein Coding	Q86UT6	45	GC11P119166	4.58114	https://www.genecards.org/cgi-bin/carddisp.pl?gene=NLRX1
PYCR2	Pyrroline-5-Carboxylate Reductase 2	Protein Coding	Q96C36	54	GC01M225919	4.57906	https://www.genecards.org/cgi-bin/carddisp.pl?gene=PYCR2
UGT1A6	UDP Glucuronosyltransferase Family 1 Member A6	Protein Coding	P19224	51	GC02P233691	4.56851	https://www.genecards.org/cgi-bin/carddisp.pl?gene=UGT1A6
HSF1	Heat Shock Transcription Factor 1	Protein Coding	Q00613	56	GC08P144291	4.56339	https://www.genecards.org/cgi-bin/carddisp.pl?gene=HSF1
TRIM26	Tripartite Motif Containing 26	Protein Coding	Q12899	44	GC06M030184	4.56097	https://www.genecards.org/cgi-bin/carddisp.pl?gene=TRIM26
BCHE	Butyrylcholinesterase	Protein Coding	P06276	59	GC03M165772	4.55339	https://www.genecards.org/cgi-bin/carddisp.pl?gene=BCHE
TLR2	Toll Like Receptor 2	Protein Coding	O60603	61	GC04P153684	4.55005	https://www.genecards.org/cgi-bin/carddisp.pl?gene=TLR2
LGALS3	Galectin 3	Protein Coding	P17931	53	GC14P055124	4.54754	https://www.genecards.org/cgi-bin/carddisp.pl?gene=LGALS3
PRKCQ	Protein Kinase C Theta	Protein Coding	Q04759	57	GC10M006940	4.54162	https://www.genecards.org/cgi-bin/carddisp.pl?gene=PRKCQ
AOC3	Amine Oxidase Copper Containing 3	Protein Coding	Q16853	54	GC17P042851	4.53347	https://www.genecards.org/cgi-bin/carddisp.pl?gene=AOC3
SLC3A2	Solute Carrier Family 3 Member 2	Protein Coding	P08195	51	GC11P062856	4.53302	https://www.genecards.org/cgi-bin/carddisp.pl?gene=SLC3A2
TRPA1	Transient Receptor Potential Cation Channel Subfamily A Member 1	Protein Coding	O75762	56	GC08M072019	4.53074	https://www.genecards.org/cgi-bin/carddisp.pl?gene=TRPA1
KDR	Kinase Insert Domain Receptor	Protein Coding	P35968	62	GC04M055078	4.52998	https://www.genecards.org/cgi-bin/carddisp.pl?gene=KDR
TBC1D24	TBC1 Domain Family Member 24	Protein Coding	Q9ULP9	48	GC16P002475	4.5283	https://www.genecards.org/cgi-bin/carddisp.pl?gene=TBC1D24
CAMK2D	Calcium/Calmodulin Dependent Protein Kinase II Delta	Protein Coding	Q13557	55	GC04M113418	4.51826	https://www.genecards.org/cgi-bin/carddisp.pl?gene=CAMK2D
POMC	Proopiomelanocortin	Protein Coding	P01189	56	GC02M025160	4.51444	https://www.genecards.org/cgi-bin/carddisp.pl?gene=POMC
PLA2G3	Phospholipase A2 Group III	Protein Coding	Q9NZ20	47	GC22M076946	4.51166	https://www.genecards.org/cgi-bin/carddisp.pl?gene=PLA2G3
ERCC8	ERCC Excision Repair 8, CSA Ubiquitin Ligase Complex Subunit	Protein Coding	Q13216	50	GC05M060913	4.50673	https://www.genecards.org/cgi-bin/carddisp.pl?gene=ERCC8
FBXW11	F-Box And WD Repeat Domain Containing 11	Protein Coding	Q9UKB1	52	GC05M171861	4.50622	https://www.genecards.org/cgi-bin/carddisp.pl?gene=FBXW11
MAPKAPK5	MAPK Activated Protein Kinase 5	Protein Coding	Q8IW41	51	GC12P111842	4.50155	https://www.genecards.org/cgi-bin/carddisp.pl?gene=MAPKAPK5
S100B	S100 Calcium Binding Protein B	Protein Coding	P04271	53	GC21M053599	4.50077	https://www.genecards.org/cgi-bin/carddisp.pl?gene=S100B
WDR26	WD Repeat Domain 26	Protein Coding	Q9H7D7	50	GC01M224385	4.4909	https://www.genecards.org/cgi-bin/carddisp.pl?gene=WDR26
NAGLU	N-Acetyl-Alpha-Glucosaminidase	Protein Coding	P54802	52	GC17P112331	4.48773	https://www.genecards.org/cgi-bin/carddisp.pl?gene=NAGLU
NDUFS2	NADH:Ubiquinone Oxidoreductase Core Subunit S2	Protein Coding	O75306	52	GC01P161197	4.48729	https://www.genecards.org/cgi-bin/carddisp.pl?gene=NDUFS2
BNIP3	BCL2 Interacting Protein 3	Protein Coding	Q12983	49	GC10M131966	4.48687	https://www.genecards.org/cgi-bin/carddisp.pl?gene=BNIP3
GSTO2	Glutathione S-Transferase Omega 2	Protein Coding	Q9H4Y5	48	GC10P104268	4.48669	https://www.genecards.org/cgi-bin/carddisp.pl?gene=GSTO2
SLC6A3	Solute Carrier Family 6 Member 3	Protein Coding	Q01959	59	GC05M001392	4.48537	https://www.genecards.org/cgi-bin/carddisp.pl?gene=SLC6A3
ATF3	Activating Transcription Factor 3	Protein Coding	P18847	53	GC01P212565	4.4825	https://www.genecards.org/cgi-bin/carddisp.pl?gene=ATF3
SLC25A4	Solute Carrier Family 25 Member 4	Protein Coding	P12235	58	GC04P185143	4.47807	https://www.genecards.org/cgi-bin/carddisp.pl?gene=SLC25A4
FASLG	Fas Ligand	Protein Coding	P48023	57	GC01P172659	4.47644	https://www.genecards.org/cgi-bin/carddisp.pl?gene=FASLG
PHB1	Prohibitin 1	Protein Coding	P35232	54	GC17M078189	4.47592	https://www.genecards.org/cgi-bin/carddisp.pl?gene=PHB1
IKBKB	Inhibitor Of Nuclear Factor Kappa B Kinase Subunit Beta	Protein Coding	O14920	62	GC08P042271	4.47242	https://www.genecards.org/cgi-bin/carddisp.pl?gene=IKBKB
NGF	Nerve Growth Factor	Protein Coding	P01138	60	GC01M115285	4.46653	https://www.genecards.org/cgi-bin/carddisp.pl?gene=NGF
LOXL4	Lysyl Oxidase Like 4	Protein Coding	Q96JB6	51	GC10M098247	4.46607	https://www.genecards.org/cgi-bin/carddisp.pl?gene=LOXL4
TREM2	Triggering Receptor Expressed On Myeloid Cells 2	Protein Coding	Q9NZC2	53	GC06M093978	4.45375	https://www.genecards.org/cgi-bin/carddisp.pl?gene=TREM2
ABCB10	ATP Binding Cassette Subfamily B Member 10	Protein Coding	Q9NRK6	49	GC01M229516	4.45123	https://www.genecards.org/cgi-bin/carddisp.pl?gene=ABCB10
ATP13A2	ATPase Cation Transporting 13A2	Protein Coding	Q9NQ11	53	GC01M016985	4.45085	https://www.genecards.org/cgi-bin/carddisp.pl?gene=ATP13A2
LPO	Lactoperoxidase	Protein Coding	P22079	49	GC17P058218	4.44981	https://www.genecards.org/cgi-bin/carddisp.pl?gene=LPO
ARL6IP5	ADP Ribosylation Factor Like GTPase 6 Interacting Protein 5	Protein Coding	O75915	43	GC03P069084	4.44848	https://www.genecards.org/cgi-bin/carddisp.pl?gene=ARL6IP5
ENDOG	Endonuclease G	Protein Coding	Q14249	50	GC09P128818	4.44143	https://www.genecards.org/cgi-bin/carddisp.pl?gene=ENDOG
IREB2	Iron Responsive Element Binding Protein 2	Protein Coding	P48200	54	GC15P078437	4.43703	https://www.genecards.org/cgi-bin/carddisp.pl?gene=IREB2
SELP	Selectin P	Protein Coding	P16109	54	GC01M169558	4.43703	https://www.genecards.org/cgi-bin/carddisp.pl?gene=SELP
EPAS1	Endothelial PAS Domain Protein 1	Protein Coding	Q99814	59	GC02P046293	4.43666	https://www.genecards.org/cgi-bin/carddisp.pl?gene=EPAS1
ACE2	Angiotensin Converting Enzyme 2	Protein Coding	Q9BYF1	58	GC0XM015494	4.43416	https://www.genecards.org/cgi-bin/carddisp.pl?gene=ACE2
NDUFA6	NADH:Ubiquinone Oxidoreductase Subunit A6	Protein Coding	P56556	51	GC22M042085	4.41624	https://www.genecards.org/cgi-bin/carddisp.pl?gene=NDUFA6
NOX5	NADPH Oxidase 5	Protein Coding	Q96PH1	44	GC15P157675	4.41621	https://www.genecards.org/cgi-bin/carddisp.pl?gene=NOX5
ADRB3	Adrenoceptor Beta 3	Protein Coding	P13945	51	GC08M037962	4.41225	https://www.genecards.org/cgi-bin/carddisp.pl?gene=ADRB3
DEPP1	DEPP Autophagy Regulator 1	Protein Coding	Q9NTK1	36	GC10M048328	4.41101	https://www.genecards.org/cgi-bin/carddisp.pl?gene=DEPP1
ACP1	Acid Phosphatase 1	Protein Coding	P24666	52	GC02P000841	4.41034	https://www.genecards.org/cgi-bin/carddisp.pl?gene=ACP1
IL2	Interleukin 2	Protein Coding	P60568	55	GC04M122451	4.40669	https://www.genecards.org/cgi-bin/carddisp.pl?gene=IL2
DNMT1	DNA Methyltransferase 1	Protein Coding	P26358	61	GC19M010133	4.40441	https://www.genecards.org/cgi-bin/carddisp.pl?gene=DNMT1
CASP1	Caspase 1	Protein Coding	P29466	58	GC11M105025	4.40114	https://www.genecards.org/cgi-bin/carddisp.pl?gene=CASP1
ELANE	Elastase, Neutrophil Expressed	Protein Coding	P08246	60	GC19P111819	4.39617	https://www.genecards.org/cgi-bin/carddisp.pl?gene=ELANE
TRAP1	TNF Receptor Associated Protein 1	Protein Coding	Q12931	49	GC16M020486	4.39617	https://www.genecards.org/cgi-bin/carddisp.pl?gene=TRAP1
PPP3CA	Protein Phosphatase 3 Catalytic Subunit Alpha	Protein Coding	Q08209	60	GC04M101024	4.39166	https://www.genecards.org/cgi-bin/carddisp.pl?gene=PPP3CA
SFN	Stratifin	Protein Coding	P31947	54	GC01P041975	4.39166	https://www.genecards.org/cgi-bin/carddisp.pl?gene=SFN
SLC2A4	Solute Carrier Family 2 Member 4	Protein Coding	P14672	55	GC17P111162	4.38638	https://www.genecards.org/cgi-bin/carddisp.pl?gene=SLC2A4
IL1A	Interleukin 1 Alpha	Protein Coding	P01583	54	GC02M112773	4.38512	https://www.genecards.org/cgi-bin/carddisp.pl?gene=IL1A
ALDH9A1	Aldehyde Dehydrogenase 9 Family Member A1	Protein Coding	P49189	50	GC01M165688	4.38125	https://www.genecards.org/cgi-bin/carddisp.pl?gene=ALDH9A1
ECPAS	Ecm29 Proteasome Adaptor And Scaffold	Protein Coding	Q5VYK3	38	GC09M111361	4.3741	https://www.genecards.org/cgi-bin/carddisp.pl?gene=ECPAS
EP300	E1A Binding Protein P300	Protein Coding	Q09472	61	GC22P070686	4.36694	https://www.genecards.org/cgi-bin/carddisp.pl?gene=EP300
CCND1	Cyclin D1	Protein Coding	P24385	62	GC11P069641	4.36426	https://www.genecards.org/cgi-bin/carddisp.pl?gene=CCND1
EEF2	Eukaryotic Translation Elongation Factor 2	Protein Coding	P13639	56	GC19M003976	4.36272	https://www.genecards.org/cgi-bin/carddisp.pl?gene=EEF2
ATP2A2	ATPase Sarcoplasmic/Endoplasmic Reticulum Ca2+ Transporting 2	Protein Coding	P16615	60	GC12P110280	4.35797	https://www.genecards.org/cgi-bin/carddisp.pl?gene=ATP2A2
IGF1R	Insulin Like Growth Factor 1 Receptor	Protein Coding	P08069	63	GC15P098648	4.35687	https://www.genecards.org/cgi-bin/carddisp.pl?gene=IGF1R
SETD2	SET Domain Containing 2, Histone Lysine Methyltransferase	Protein Coding	Q9BYW2	56	GC03M047033	4.34446	https://www.genecards.org/cgi-bin/carddisp.pl?gene=SETD2
NEIL2	Nei Like DNA Glycosylase 2	Protein Coding	Q969S2	46	GC08P011769	4.34068	https://www.genecards.org/cgi-bin/carddisp.pl?gene=NEIL2
MT2A	Metallothionein 2A	Protein Coding	P02795	49	GC16P082422	4.33783	https://www.genecards.org/cgi-bin/carddisp.pl?gene=MT2A
MFN2	Mitofusin 2	Protein Coding	O95140	57	GC01P011980	4.3368	https://www.genecards.org/cgi-bin/carddisp.pl?gene=MFN2
SLC25A24	Solute Carrier Family 25 Member 24	Protein Coding	Q6NUK1	51	GC01M108134	4.33586	https://www.genecards.org/cgi-bin/carddisp.pl?gene=SLC25A24
HGF	Hepatocyte Growth Factor	Protein Coding	P14210	60	GC07M081699	4.32558	https://www.genecards.org/cgi-bin/carddisp.pl?gene=HGF
CDKN1B	Cyclin Dependent Kinase Inhibitor 1B	Protein Coding	P46527	57	GC12P039206	4.3165	https://www.genecards.org/cgi-bin/carddisp.pl?gene=CDKN1B
MT1X	Metallothionein 1X	Protein Coding	P80297	45	GC16P082431	4.31611	https://www.genecards.org/cgi-bin/carddisp.pl?gene=MT1X
XRCC5	X-Ray Repair Cross Complementing 5	Protein Coding	P13010	53	GC02P216107	4.30923	https://www.genecards.org/cgi-bin/carddisp.pl?gene=XRCC5
STK39	Serine/Threonine Kinase 39	Protein Coding	Q9UEW8	51	GC02M167954	4.30602	https://www.genecards.org/cgi-bin/carddisp.pl?gene=STK39
XIAP	X-Linked Inhibitor Of Apoptosis	Protein Coding	P98170	60	GC0XP123859	4.29589	https://www.genecards.org/cgi-bin/carddisp.pl?gene=XIAP
UCP1	Uncoupling Protein 1	Protein Coding	P25874	51	GC04M140559	4.29368	https://www.genecards.org/cgi-bin/carddisp.pl?gene=UCP1
SUMO1	Small Ubiquitin Like Modifier 1	Protein Coding	P63165	55	GC02M202206	4.29219	https://www.genecards.org/cgi-bin/carddisp.pl?gene=SUMO1
CD40LG	CD40 Ligand	Protein Coding	P29965	59	GC0XP136649	4.28698	https://www.genecards.org/cgi-bin/carddisp.pl?gene=CD40LG
NDUFS8	NADH:Ubiquinone Oxidoreductase Core Subunit S8	Protein Coding	O00217	52	GC11P068030	4.27861	https://www.genecards.org/cgi-bin/carddisp.pl?gene=NDUFS8
SUMO4	Small Ubiquitin Like Modifier 4	Protein Coding	Q6EEV6	46	GC06P149401	4.26985	https://www.genecards.org/cgi-bin/carddisp.pl?gene=SUMO4
KRIT1	KRIT1 Ankyrin Repeat Containing	Protein Coding	O00522	51	GC07M092198	4.26234	https://www.genecards.org/cgi-bin/carddisp.pl?gene=KRIT1
PKM	Pyruvate Kinase M1/2	Protein Coding	P14618	58	GC15M072199	4.26061	https://www.genecards.org/cgi-bin/carddisp.pl?gene=PKM
ADA	Adenosine Deaminase	Protein Coding	P00813	60	GC20M044620	4.24468	https://www.genecards.org/cgi-bin/carddisp.pl?gene=ADA
YWHAB	Tyrosine 3-Monooxygenase/Tryptophan 5-Monooxygenase Activation Protein Beta	Protein Coding	P31946	55	GC20P044885	4.24339	https://www.genecards.org/cgi-bin/carddisp.pl?gene=YWHAB
HSP90B1	Heat Shock Protein 90 Beta Family Member 1	Protein Coding	P14625	55	GC12P103930	4.23097	https://www.genecards.org/cgi-bin/carddisp.pl?gene=HSP90B1
TGM2	Transglutaminase 2	Protein Coding	P21980	56	GC20M038127	4.22904	https://www.genecards.org/cgi-bin/carddisp.pl?gene=TGM2
IGFBP7	Insulin Like Growth Factor Binding Protein 7	Protein Coding	Q16270	54	GC04M057030	4.22895	https://www.genecards.org/cgi-bin/carddisp.pl?gene=IGFBP7
TGFB2	Transforming Growth Factor Beta 2	Protein Coding	P61812	60	GC01P218345	4.21943	https://www.genecards.org/cgi-bin/carddisp.pl?gene=TGFB2
ENG	Endoglin	Protein Coding	P17813	56	GC09M127815	4.21816	https://www.genecards.org/cgi-bin/carddisp.pl?gene=ENG
XPC	XPC Complex Subunit, DNA Damage Recognition And Repair Factor	Protein Coding	Q01831	54	GC03M026205	4.21816	https://www.genecards.org/cgi-bin/carddisp.pl?gene=XPC
TRIM21	Tripartite Motif Containing 21	Protein Coding	P19474	52	GC11M004384	4.2131	https://www.genecards.org/cgi-bin/carddisp.pl?gene=TRIM21
C19orf12	Chromosome 19 Open Reading Frame 12	Protein Coding	Q9NSK7	43	GC19M092604	4.21274	https://www.genecards.org/cgi-bin/carddisp.pl?gene=C19orf12
AMBP	Alpha-1-Microglobulin/Bikunin Precursor	Protein Coding	P02760	52	GC09M114060	4.20245	https://www.genecards.org/cgi-bin/carddisp.pl?gene=AMBP
MT1A	Metallothionein 1A	Protein Coding	P04731	43	GC16P056638	4.19799	https://www.genecards.org/cgi-bin/carddisp.pl?gene=MT1A
ENO1	Enolase 1	Protein Coding	P06733	56	GC01M008861	4.1932	https://www.genecards.org/cgi-bin/carddisp.pl?gene=ENO1
HAMP	Hepcidin Antimicrobial Peptide	Protein Coding	P81172	52	GC19P112928	4.19139	https://www.genecards.org/cgi-bin/carddisp.pl?gene=HAMP
HDAC3	Histone Deacetylase 3	Protein Coding	O15379	58	GC05M141620	4.18885	https://www.genecards.org/cgi-bin/carddisp.pl?gene=HDAC3
TTR	Transthyretin	Protein Coding	P02766	57	GC18P031557	4.18802	https://www.genecards.org/cgi-bin/carddisp.pl?gene=TTR
SMAD2	SMAD Family Member 2	Protein Coding	Q15796	60	GC18M047809	4.18554	https://www.genecards.org/cgi-bin/carddisp.pl?gene=SMAD2
CD44	CD44 Molecule (IN Blood Group)	Protein Coding	P16070	57	GC11P035139	4.18507	https://www.genecards.org/cgi-bin/carddisp.pl?gene=CD44
PTK2B	Protein Tyrosine Kinase 2 Beta	Protein Coding	Q14289	58	GC08P027311	4.17995	https://www.genecards.org/cgi-bin/carddisp.pl?gene=PTK2B
FGF2	Fibroblast Growth Factor 2	Protein Coding	P09038	54	GC04P122826	4.17653	https://www.genecards.org/cgi-bin/carddisp.pl?gene=FGF2
SUV39H1	SUV39H1 Histone Lysine Methyltransferase	Protein Coding	O43463	51	GC0XP057564	4.17398	https://www.genecards.org/cgi-bin/carddisp.pl?gene=SUV39H1
PRKAB1	Protein Kinase AMP-Activated Non-Catalytic Subunit Beta 1	Protein Coding	Q9Y478	56	GC12P119667	4.16781	https://www.genecards.org/cgi-bin/carddisp.pl?gene=PRKAB1
ALOX12	Arachidonate 12-Lipoxygenase, 12S Type	Protein Coding	P18054	53	GC17P111131	4.16757	https://www.genecards.org/cgi-bin/carddisp.pl?gene=ALOX12
CXCL1	C-X-C Motif Chemokine Ligand 1	Protein Coding	P09341	52	GC04P073869	4.16228	https://www.genecards.org/cgi-bin/carddisp.pl?gene=CXCL1
FOXP2	Forkhead Box P2	Protein Coding	O15409	53	GC07P114086	4.15991	https://www.genecards.org/cgi-bin/carddisp.pl?gene=FOXP2
PTPA	Protein Phosphatase 2 Phosphatase Activator	Protein Coding	Q15257	52	GC09P141447	4.15836	https://www.genecards.org/cgi-bin/carddisp.pl?gene=PTPA
CLEC4A	C-Type Lectin Domain Family 4 Member A	Protein Coding	Q9UMR7	45	GC12P039023	4.15836	https://www.genecards.org/cgi-bin/carddisp.pl?gene=CLEC4A
UCHL1	Ubiquitin C-Terminal Hydrolase L1	Protein Coding	P09936	61	GC04P041256	4.15568	https://www.genecards.org/cgi-bin/carddisp.pl?gene=UCHL1
TLDC2	TBC/LysM-Associated Domain Containing 2	Protein Coding	A0PJX2	36	GC20P036876	4.14473	https://www.genecards.org/cgi-bin/carddisp.pl?gene=TLDC2
G3BP1	G3BP Stress Granule Assembly Factor 1	Protein Coding	Q13283	49	GC05P151771	4.13892	https://www.genecards.org/cgi-bin/carddisp.pl?gene=G3BP1
EPHA3	EPH Receptor A3	Protein Coding	P29320	55	GC03P089077	4.13319	https://www.genecards.org/cgi-bin/carddisp.pl?gene=EPHA3
POLB	DNA Polymerase Beta	Protein Coding	P06746	55	GC08P042338	4.12411	https://www.genecards.org/cgi-bin/carddisp.pl?gene=POLB
GABPA	GA Binding Protein Transcription Factor Subunit Alpha	Protein Coding	Q06546	44	GC21P025734	4.12324	https://www.genecards.org/cgi-bin/carddisp.pl?gene=GABPA
XRCC6	X-Ray Repair Cross Complementing 6	Protein Coding	P12956	54	GC22P070718	4.11605	https://www.genecards.org/cgi-bin/carddisp.pl?gene=XRCC6
FNDC5	Fibronectin Type III Domain Containing 5	Protein Coding	Q8NAU1	43	GC01M033961	4.11605	https://www.genecards.org/cgi-bin/carddisp.pl?gene=FNDC5
CDKN2B	Cyclin Dependent Kinase Inhibitor 2B	Protein Coding	P42772	54	GC09M022002	4.11523	https://www.genecards.org/cgi-bin/carddisp.pl?gene=CDKN2B
TPM1	Tropomyosin 1	Protein Coding	P09493	58	GC15P165361	4.11232	https://www.genecards.org/cgi-bin/carddisp.pl?gene=TPM1
PRMT1	Protein Arginine Methyltransferase 1	Protein Coding	Q99873	56	GC19P049675	4.10651	https://www.genecards.org/cgi-bin/carddisp.pl?gene=PRMT1
YWHAH	Tyrosine 3-Monooxygenase/Tryptophan 5-Monooxygenase Activation Protein Eta	Protein Coding	Q04917	54	GC22P031944	4.10126	https://www.genecards.org/cgi-bin/carddisp.pl?gene=YWHAH
DNAH8	Dynein Axonemal Heavy Chain 8	Protein Coding	Q96JB1	47	GC06P135004	4.0894	https://www.genecards.org/cgi-bin/carddisp.pl?gene=DNAH8
PEX5	Peroxisomal Biogenesis Factor 5	Protein Coding	P50542	52	GC12P039004	4.08082	https://www.genecards.org/cgi-bin/carddisp.pl?gene=PEX5
ROMO1	Reactive Oxygen Species Modulator 1	Protein Coding	P60602	40	GC20P035699	4.07709	https://www.genecards.org/cgi-bin/carddisp.pl?gene=ROMO1
VDR	Vitamin D Receptor	Protein Coding	P11473	57	GC12M047841	4.07362	https://www.genecards.org/cgi-bin/carddisp.pl?gene=VDR
REST	RE1 Silencing Transcription Factor	Protein Coding	Q13127	52	GC04P056907	4.06886	https://www.genecards.org/cgi-bin/carddisp.pl?gene=REST
NR3C2	Nuclear Receptor Subfamily 3 Group C Member 2	Protein Coding	P08235	55	GC04M148078	4.06886	https://www.genecards.org/cgi-bin/carddisp.pl?gene=NR3C2
TYR	Tyrosinase	Protein Coding	P14679	57	GC11P089177	4.05787	https://www.genecards.org/cgi-bin/carddisp.pl?gene=TYR
TTPA	Alpha Tocopherol Transfer Protein	Protein Coding	P49638	50	GC08M063048	4.0573	https://www.genecards.org/cgi-bin/carddisp.pl?gene=TTPA
MAPK7	Mitogen-Activated Protein Kinase 7	Protein Coding	Q13164	56	GC17P111585	4.04835	https://www.genecards.org/cgi-bin/carddisp.pl?gene=MAPK7
SLC25A14	Solute Carrier Family 25 Member 14	Protein Coding	O95258	43	GC0XP130339	4.04738	https://www.genecards.org/cgi-bin/carddisp.pl?gene=SLC25A14
RIPK1	Receptor Interacting Serine/Threonine Kinase 1	Protein Coding	Q13546	59	GC06P006449	4.04562	https://www.genecards.org/cgi-bin/carddisp.pl?gene=RIPK1
IL3	Interleukin 3	Protein Coding	P08700	54	GC05P132060	4.04559	https://www.genecards.org/cgi-bin/carddisp.pl?gene=IL3
FBXW7	F-Box And WD Repeat Domain Containing 7	Protein Coding	Q969H0	54	GC04M152321	4.04492	https://www.genecards.org/cgi-bin/carddisp.pl?gene=FBXW7
PDE5A	Phosphodiesterase 5A	Protein Coding	O76074	54	GC04M119494	4.04142	https://www.genecards.org/cgi-bin/carddisp.pl?gene=PDE5A
NDUFS1	NADH:Ubiquinone Oxidoreductase Core Subunit S1	Protein Coding	P28331	52	GC02M206114	4.04138	https://www.genecards.org/cgi-bin/carddisp.pl?gene=NDUFS1
MUC5AC	Mucin 5AC, Oligomeric Mucus/Gel-Forming	Protein Coding	P98088	48	GC11P010637	4.04138	https://www.genecards.org/cgi-bin/carddisp.pl?gene=MUC5AC
ARAF	A-Raf Proto-Oncogene, Serine/Threonine Kinase	Protein Coding	P10398	55	GC0XP057482	4.02963	https://www.genecards.org/cgi-bin/carddisp.pl?gene=ARAF
MAPK12	Mitogen-Activated Protein Kinase 12	Protein Coding	P53778	55	GC22M077248	4.02963	https://www.genecards.org/cgi-bin/carddisp.pl?gene=MAPK12
SIN3A	SIN3 Transcription Regulator Family Member A	Protein Coding	Q96ST3	54	GC15M075369	4.02038	https://www.genecards.org/cgi-bin/carddisp.pl?gene=SIN3A
MAFF	MAF BZIP Transcription Factor F	Protein Coding	Q9ULX9	46	GC22P038200	4.01653	https://www.genecards.org/cgi-bin/carddisp.pl?gene=MAFF
RALBP1	RalA Binding Protein 1	Protein Coding	Q15311	51	GC18P009465	4.0163	https://www.genecards.org/cgi-bin/carddisp.pl?gene=RALBP1
REN	Renin	Protein Coding	P00797	58	GC01M204154	4.01213	https://www.genecards.org/cgi-bin/carddisp.pl?gene=REN
NNT	Nicotinamide Nucleotide Transhydrogenase	Protein Coding	Q13423	51	GC05P043602	4.00869	https://www.genecards.org/cgi-bin/carddisp.pl?gene=NNT
ALDH7A1	Aldehyde Dehydrogenase 7 Family Member A1	Protein Coding	P49419	56	GC05M126541	4.00825	https://www.genecards.org/cgi-bin/carddisp.pl?gene=ALDH7A1
KLHDC10	Kelch Domain Containing 10	Protein Coding	Q6PID8	39	GC07P130070	4.00825	https://www.genecards.org/cgi-bin/carddisp.pl?gene=KLHDC10
GLUL	Glutamate-Ammonia Ligase	Protein Coding	P15104	57	GC01M182378	4.00754	https://www.genecards.org/cgi-bin/carddisp.pl?gene=GLUL
PRODH	Proline Dehydrogenase 1	Protein Coding	O43272	54	GC22M018912	4.00065	https://www.genecards.org/cgi-bin/carddisp.pl?gene=PRODH
MMP3	Matrix Metallopeptidase 3	Protein Coding	P08254	59	GC11M102835	3.99572	https://www.genecards.org/cgi-bin/carddisp.pl?gene=MMP3
TPT1	Tumor Protein, Translationally-Controlled 1	Protein Coding	P13693	56	GC13M045333	3.99236	https://www.genecards.org/cgi-bin/carddisp.pl?gene=TPT1
STK11	Serine/Threonine Kinase 11	Protein Coding	Q15831	59	GC19P001177	3.99189	https://www.genecards.org/cgi-bin/carddisp.pl?gene=STK11
NOTCH1	Notch Receptor 1	Protein Coding	P46531	61	GC09M138715	3.97998	https://www.genecards.org/cgi-bin/carddisp.pl?gene=NOTCH1
LCN2	Lipocalin 2	Protein Coding	P80188	54	GC09P128149	3.97831	https://www.genecards.org/cgi-bin/carddisp.pl?gene=LCN2
EIF4E	Eukaryotic Translation Initiation Factor 4E	Protein Coding	P06730	59	GC04M098879	3.97606	https://www.genecards.org/cgi-bin/carddisp.pl?gene=EIF4E
AKR1C3	Aldo-Keto Reductase Family 1 Member C3	Protein Coding	P42330	54	GC10P005035	3.97606	https://www.genecards.org/cgi-bin/carddisp.pl?gene=AKR1C3
IDH1	Isocitrate Dehydrogenase (NADP(+)) 1	Protein Coding	O75874	61	GC02M208236	3.97342	https://www.genecards.org/cgi-bin/carddisp.pl?gene=IDH1
PTPN3	Protein Tyrosine Phosphatase Non-Receptor Type 3	Protein Coding	P26045	51	GC09M109375	3.96133	https://www.genecards.org/cgi-bin/carddisp.pl?gene=PTPN3
BMP4	Bone Morphogenetic Protein 4	Protein Coding	P12644	58	GC14M053949	3.9573	https://www.genecards.org/cgi-bin/carddisp.pl?gene=BMP4
MTFR1	Mitochondrial Fission Regulator 1	Protein Coding	Q15390	44	GC08P065643	3.95283	https://www.genecards.org/cgi-bin/carddisp.pl?gene=MTFR1
CA3	Carbonic Anhydrase 3	Protein Coding	P07451	50	GC08P085373	3.94989	https://www.genecards.org/cgi-bin/carddisp.pl?gene=CA3
RBBP4	RB Binding Protein 4, Chromatin Remodeling Factor	Protein Coding	Q09028	53	GC01P032651	3.94541	https://www.genecards.org/cgi-bin/carddisp.pl?gene=RBBP4
NUDT3	Nudix Hydrolase 3	Protein Coding	O95989	40	GC06M093917	3.93052	https://www.genecards.org/cgi-bin/carddisp.pl?gene=NUDT3
TRIM25	Tripartite Motif Containing 25	Protein Coding	Q14258	52	GC17M056836	3.92211	https://www.genecards.org/cgi-bin/carddisp.pl?gene=TRIM25
SDHB	Succinate Dehydrogenase Complex Iron Sulfur Subunit B	Protein Coding	P21912	57	GC01M019222	3.91835	https://www.genecards.org/cgi-bin/carddisp.pl?gene=SDHB
APOH	Apolipoprotein H	Protein Coding	P02749	53	GC17M066212	3.91646	https://www.genecards.org/cgi-bin/carddisp.pl?gene=APOH
NDUFS7	NADH:Ubiquinone Oxidoreductase Core Subunit S7	Protein Coding	O75251	54	GC19P111868	3.91511	https://www.genecards.org/cgi-bin/carddisp.pl?gene=NDUFS7
IAPP	Islet Amyloid Polypeptide	Protein Coding	P10997	49	GC12P021354	3.91164	https://www.genecards.org/cgi-bin/carddisp.pl?gene=IAPP
TOR1A	Torsin Family 1 Member A	Protein Coding	O14656	55	GC09M129812	3.9041	https://www.genecards.org/cgi-bin/carddisp.pl?gene=TOR1A
PDX1	Pancreatic And Duodenal Homeobox 1	Protein Coding	P52945	54	GC13P027921	3.90258	https://www.genecards.org/cgi-bin/carddisp.pl?gene=PDX1
ATF6	Activating Transcription Factor 6	Protein Coding	P18850	57	GC01P161766	3.89496	https://www.genecards.org/cgi-bin/carddisp.pl?gene=ATF6
GPX5	Glutathione Peroxidase 5	Protein Coding	O75715	47	GC06P028525	3.88849	https://www.genecards.org/cgi-bin/carddisp.pl?gene=GPX5
ADM	Adrenomedullin	Protein Coding	P35318	54	GC11P011175	3.88525	https://www.genecards.org/cgi-bin/carddisp.pl?gene=ADM
INSR	Insulin Receptor	Protein Coding	P06213	62	GC19M007112	3.88149	https://www.genecards.org/cgi-bin/carddisp.pl?gene=INSR
EZH2	Enhancer Of Zeste 2 Polycomb Repressive Complex 2 Subunit	Protein Coding	Q15910	61	GC07M148807	3.87977	https://www.genecards.org/cgi-bin/carddisp.pl?gene=EZH2
NOX3	NADPH Oxidase 3	Protein Coding	Q9HBY0	51	GC06M155395	3.87543	https://www.genecards.org/cgi-bin/carddisp.pl?gene=NOX3
ENTPD7	Ectonucleoside Triphosphate Diphosphohydrolase 7	Protein Coding	Q9NQZ7	42	GC10P099659	3.8751	https://www.genecards.org/cgi-bin/carddisp.pl?gene=ENTPD7
SETX	Senataxin	Protein Coding	Q7Z333	51	GC09M132261	3.86967	https://www.genecards.org/cgi-bin/carddisp.pl?gene=SETX
CCL3	C-C Motif Chemokine Ligand 3	Protein Coding	P10147	50	GC17M036088	3.86058	https://www.genecards.org/cgi-bin/carddisp.pl?gene=CCL3
NPM1	Nucleophosmin 1	Protein Coding	P06748	59	GC05P171387	3.85928	https://www.genecards.org/cgi-bin/carddisp.pl?gene=NPM1
PPP3R1	Protein Phosphatase 3 Regulatory Subunit B, Alpha	Protein Coding	P63098	53	GC02M068143	3.85669	https://www.genecards.org/cgi-bin/carddisp.pl?gene=PPP3R1
RPS6KA4	Ribosomal Protein S6 Kinase A4	Protein Coding	O75676	53	GC11P088967	3.85669	https://www.genecards.org/cgi-bin/carddisp.pl?gene=RPS6KA4
MRAS	Muscle RAS Oncogene Homolog	Protein Coding	O14807	52	GC03P138347	3.85669	https://www.genecards.org/cgi-bin/carddisp.pl?gene=MRAS
CAMKK1	Calcium/Calmodulin Dependent Protein Kinase Kinase 1	Protein Coding	Q8N5S9	51	GC17M003860	3.85669	https://www.genecards.org/cgi-bin/carddisp.pl?gene=CAMKK1
CAMK1	Calcium/Calmodulin Dependent Protein Kinase I	Protein Coding	Q14012	45	GC03M009774	3.85669	https://www.genecards.org/cgi-bin/carddisp.pl?gene=CAMK1
BMF	Bcl2 Modifying Factor	Protein Coding	Q96LC9	43	GC15M040087	3.85669	https://www.genecards.org/cgi-bin/carddisp.pl?gene=BMF
PPM1L	Protein Phosphatase, Mg2+/Mn2+ Dependent 1L	Protein Coding	Q5SGD2	43	GC03P160755	3.85669	https://www.genecards.org/cgi-bin/carddisp.pl?gene=PPM1L
KRT8	Keratin 8	Protein Coding	P05787	55	GC12M052897	3.85376	https://www.genecards.org/cgi-bin/carddisp.pl?gene=KRT8
MTR	5-Methyltetrahydrofolate-Homocysteine Methyltransferase	Protein Coding	Q99707	56	GC01P236795	3.85138	https://www.genecards.org/cgi-bin/carddisp.pl?gene=MTR
BLVRA	Biliverdin Reductase A	Protein Coding	P53004	52	GC07P043758	3.85138	https://www.genecards.org/cgi-bin/carddisp.pl?gene=BLVRA
SHH	Sonic Hedgehog Signaling Molecule	Protein Coding	Q15465	59	GC07M155799	3.84652	https://www.genecards.org/cgi-bin/carddisp.pl?gene=SHH
FTH1	Ferritin Heavy Chain 1	Protein Coding	P02794	58	GC11M061959	3.84362	https://www.genecards.org/cgi-bin/carddisp.pl?gene=FTH1
USP7	Ubiquitin Specific Peptidase 7	Protein Coding	Q93009	57	GC16M008892	3.84047	https://www.genecards.org/cgi-bin/carddisp.pl?gene=USP7
FANCD2	FA Complementation Group D2	Protein Coding	Q9BXW9	55	GC03P010026	3.83665	https://www.genecards.org/cgi-bin/carddisp.pl?gene=FANCD2
GDNF	Glial Cell Derived Neurotrophic Factor	Protein Coding	P39905	59	GC05M037812	3.83597	https://www.genecards.org/cgi-bin/carddisp.pl?gene=GDNF
SORCS2	Sortilin Related VPS10 Domain Containing Receptor 2	Protein Coding	Q96PQ0	45	GC04P007689	3.82922	https://www.genecards.org/cgi-bin/carddisp.pl?gene=SORCS2
HEBP2	Heme Binding Protein 2	Protein Coding	Q9Y5Z4	41	GC06P138403	3.82876	https://www.genecards.org/cgi-bin/carddisp.pl?gene=HEBP2
FDXR	Ferredoxin Reductase	Protein Coding	P22570	53	GC17M074862	3.82625	https://www.genecards.org/cgi-bin/carddisp.pl?gene=FDXR
TBXA2R	Thromboxane A2 Receptor	Protein Coding	P21731	59	GC19M003594	3.82209	https://www.genecards.org/cgi-bin/carddisp.pl?gene=TBXA2R
MAFK	MAF BZIP Transcription Factor K	Protein Coding	O60675	45	GC07P011364	3.82009	https://www.genecards.org/cgi-bin/carddisp.pl?gene=MAFK
MTF1	Metal Regulatory Transcription Factor 1	Protein Coding	Q14872	45	GC01M037810	3.81804	https://www.genecards.org/cgi-bin/carddisp.pl?gene=MTF1
MDM4	MDM4 Regulator Of P53	Protein Coding	O15151	55	GC01P204516	3.81062	https://www.genecards.org/cgi-bin/carddisp.pl?gene=MDM4
ERCC1	ERCC Excision Repair 1, Endonuclease Non-Catalytic Subunit	Protein Coding	P07992	54	GC19M092923	3.80436	https://www.genecards.org/cgi-bin/carddisp.pl?gene=ERCC1
KNG1	Kininogen 1	Protein Coding	P01042	56	GC03P186717	3.80237	https://www.genecards.org/cgi-bin/carddisp.pl?gene=KNG1
DUOX1	Dual Oxidase 1	Protein Coding	Q9NRD9	50	GC15P045129	3.80105	https://www.genecards.org/cgi-bin/carddisp.pl?gene=DUOX1
RB1	RB Transcriptional Corepressor 1	Protein Coding	P06400	57	GC13P048303	3.78706	https://www.genecards.org/cgi-bin/carddisp.pl?gene=RB1
BIRC5	Baculoviral IAP Repeat Containing 5	Protein Coding	O15392	55	GC17P078214	3.78443	https://www.genecards.org/cgi-bin/carddisp.pl?gene=BIRC5
RAD51C	RAD51 Paralog C	Protein Coding	O43502	52	GC17P058692	3.78233	https://www.genecards.org/cgi-bin/carddisp.pl?gene=RAD51C
ARG2	Arginase 2	Protein Coding	P78540	54	GC14P067619	3.78168	https://www.genecards.org/cgi-bin/carddisp.pl?gene=ARG2
APOA2	Apolipoprotein A2	Protein Coding	P02652	53	GC01M161222	3.78168	https://www.genecards.org/cgi-bin/carddisp.pl?gene=APOA2
TRPC6	Transient Receptor Potential Cation Channel Subfamily C Member 6	Protein Coding	Q9Y210	58	GC11M101451	3.78151	https://www.genecards.org/cgi-bin/carddisp.pl?gene=TRPC6
MT-ND1	Mitochondrially Encoded NADH:Ubiquinone Oxidoreductase Core Subunit 1	Protein Coding	P03886	40	GCMTP003309	3.77868	https://www.genecards.org/cgi-bin/carddisp.pl?gene=MT-ND1
ERN1	Endoplasmic Reticulum To Nucleus Signaling 1	Protein Coding	O75460	56	GC17M064039	3.77351	https://www.genecards.org/cgi-bin/carddisp.pl?gene=ERN1
ADCYAP1	Adenylate Cyclase Activating Polypeptide 1	Protein Coding	P18509	51	GC18P000895	3.76485	https://www.genecards.org/cgi-bin/carddisp.pl?gene=ADCYAP1
GSTK1	Glutathione S-Transferase Kappa 1	Protein Coding	Q9Y2Q3	47	GC07P157909	3.76109	https://www.genecards.org/cgi-bin/carddisp.pl?gene=GSTK1
NAPRT	Nicotinate Phosphoribosyltransferase	Protein Coding	Q6XQN6	46	GC08M143578	3.75206	https://www.genecards.org/cgi-bin/carddisp.pl?gene=NAPRT
BCO2	Beta-Carotene Oxygenase 2	Protein Coding	Q9BYV7	45	GC11P112175	3.74839	https://www.genecards.org/cgi-bin/carddisp.pl?gene=BCO2
CCN2	Cellular Communication Network Factor 2	Protein Coding	P29279	54	GC06M131948	3.74765	https://www.genecards.org/cgi-bin/carddisp.pl?gene=CCN2
NDUFAF2	NADH:Ubiquinone Oxidoreductase Complex Assembly Factor 2	Protein Coding	Q8N183	49	GC05P060945	3.74683	https://www.genecards.org/cgi-bin/carddisp.pl?gene=NDUFAF2
POR	Cytochrome P450 Oxidoreductase	Protein Coding	P16435	55	GC07P075899	3.74362	https://www.genecards.org/cgi-bin/carddisp.pl?gene=POR
GHRL	Ghrelin And Obestatin Prepropeptide	Protein Coding	Q9UBU3	50	GC03M010285	3.74362	https://www.genecards.org/cgi-bin/carddisp.pl?gene=GHRL
TH	Tyrosine Hydroxylase	Protein Coding	P07101	59	GC11M002163	3.74202	https://www.genecards.org/cgi-bin/carddisp.pl?gene=TH
CTSB	Cathepsin B	Protein Coding	P07858	60	GC08M011842	3.73778	https://www.genecards.org/cgi-bin/carddisp.pl?gene=CTSB
SLC23A1	Solute Carrier Family 23 Member 1	Protein Coding	Q9UHI7	46	GC05M139367	3.73565	https://www.genecards.org/cgi-bin/carddisp.pl?gene=SLC23A1
DPP4	Dipeptidyl Peptidase 4	Protein Coding	P27487	58	GC02M161992	3.72843	https://www.genecards.org/cgi-bin/carddisp.pl?gene=DPP4
TNFRSF1A	TNF Receptor Superfamily Member 1A	Protein Coding	P19438	59	GC12M006328	3.72578	https://www.genecards.org/cgi-bin/carddisp.pl?gene=TNFRSF1A
CCL5	C-C Motif Chemokine Ligand 5	Protein Coding	P13501	52	GC17M035871	3.72578	https://www.genecards.org/cgi-bin/carddisp.pl?gene=CCL5
MUC1	Mucin 1, Cell Surface Associated	Protein Coding	P15941	56	GC01M155185	3.72407	https://www.genecards.org/cgi-bin/carddisp.pl?gene=MUC1
CDK2	Cyclin Dependent Kinase 2	Protein Coding	P24941	60	GC12P055966	3.72133	https://www.genecards.org/cgi-bin/carddisp.pl?gene=CDK2
RBM11	RNA Binding Motif Protein 11	Protein Coding	P57052	38	GC21P014216	3.71976	https://www.genecards.org/cgi-bin/carddisp.pl?gene=RBM11
SELENOK	Selenoprotein K	Protein Coding	Q9Y6D0	37	GC03M053884	3.71124	https://www.genecards.org/cgi-bin/carddisp.pl?gene=SELENOK
HDAC6	Histone Deacetylase 6	Protein Coding	Q9UBN7	62	GC0XP048801	3.70408	https://www.genecards.org/cgi-bin/carddisp.pl?gene=HDAC6
SMARCA4	SWI/SNF Related, Matrix Associated, Actin Dependent Regulator Of Chromatin, Subfamily A, Member 4	Protein Coding	P51532	60	GC19P112312	3.70303	https://www.genecards.org/cgi-bin/carddisp.pl?gene=SMARCA4
CYP1A2	Cytochrome P450 Family 1 Subfamily A Member 2	Protein Coding	P05177	54	GC15P074748	3.70248	https://www.genecards.org/cgi-bin/carddisp.pl?gene=CYP1A2
GJA1	Gap Junction Protein Alpha 1	Protein Coding	P17302	59	GC06P136245	3.6909	https://www.genecards.org/cgi-bin/carddisp.pl?gene=GJA1
SIVA1	SIVA1 Apoptosis Inducing Factor	Protein Coding	O15304	40	GC14P104753	3.68697	https://www.genecards.org/cgi-bin/carddisp.pl?gene=SIVA1
RHOA	Ras Homolog Family Member A	Protein Coding	P61586	59	GC03M049359	3.68658	https://www.genecards.org/cgi-bin/carddisp.pl?gene=RHOA
DNAJB1	DnaJ Heat Shock Protein Family (Hsp40) Member B1	Protein Coding	P25685	53	GC19M014514	3.68418	https://www.genecards.org/cgi-bin/carddisp.pl?gene=DNAJB1
STAT1	Signal Transducer And Activator Of Transcription 1	Protein Coding	P42224	61	GC02M190908	3.68151	https://www.genecards.org/cgi-bin/carddisp.pl?gene=STAT1
BANF1	BAF Nuclear Assembly Factor 1	Protein Coding	O75531	51	GC11P066002	3.67391	https://www.genecards.org/cgi-bin/carddisp.pl?gene=BANF1
STK25	Serine/Threonine Kinase 25	Protein Coding	O00506	49	GC02M241492	3.6728	https://www.genecards.org/cgi-bin/carddisp.pl?gene=STK25
MECP2	Methyl-CpG Binding Protein 2	Protein Coding	P51608	55	GC0XM154021	3.6698	https://www.genecards.org/cgi-bin/carddisp.pl?gene=MECP2
CS	Citrate Synthase	Protein Coding	O75390	54	GC12M056271	3.66911	https://www.genecards.org/cgi-bin/carddisp.pl?gene=CS
APAF1	Apoptotic Peptidase Activating Factor 1	Protein Coding	O14727	56	GC12P098645	3.6656	https://www.genecards.org/cgi-bin/carddisp.pl?gene=APAF1
TNFSF10	TNF Superfamily Member 10	Protein Coding	P50591	53	GC03M172505	3.66327	https://www.genecards.org/cgi-bin/carddisp.pl?gene=TNFSF10
FYN	FYN Proto-Oncogene, Src Family Tyrosine Kinase	Protein Coding	P06241	56	GC06M111660	3.65949	https://www.genecards.org/cgi-bin/carddisp.pl?gene=FYN
HBEGF	Heparin Binding EGF Like Growth Factor	Protein Coding	Q99075	53	GC05M140332	3.65797	https://www.genecards.org/cgi-bin/carddisp.pl?gene=HBEGF
ADAM17	ADAM Metallopeptidase Domain 17	Protein Coding	P78536	59	GC02M009488	3.64997	https://www.genecards.org/cgi-bin/carddisp.pl?gene=ADAM17
IFNA1	Interferon Alpha 1	Protein Coding	P01562	48	GC09P021770	3.64544	https://www.genecards.org/cgi-bin/carddisp.pl?gene=IFNA1
RRM2B	Ribonucleotide Reductase Regulatory TP53 Inducible Subunit M2B	Protein Coding	Q7LG56	57	GC08M102204	3.64537	https://www.genecards.org/cgi-bin/carddisp.pl?gene=RRM2B
ACADS	Acyl-CoA Dehydrogenase Short Chain	Protein Coding	P16219	52	GC12P133242	3.63457	https://www.genecards.org/cgi-bin/carddisp.pl?gene=ACADS
NUP62	Nucleoporin 62	Protein Coding	P37198	52	GC19M049906	3.61665	https://www.genecards.org/cgi-bin/carddisp.pl?gene=NUP62
SLC40A1	Solute Carrier Family 40 Member 1	Protein Coding	Q9NP59	56	GC02M189560	3.61571	https://www.genecards.org/cgi-bin/carddisp.pl?gene=SLC40A1
PSEN2	Presenilin 2	Protein Coding	P49810	58	GC01P226870	3.61412	https://www.genecards.org/cgi-bin/carddisp.pl?gene=PSEN2
DRD2	Dopamine Receptor D2	Protein Coding	P14416	58	GC11M113409	3.61123	https://www.genecards.org/cgi-bin/carddisp.pl?gene=DRD2
CHEK1	Checkpoint Kinase 1	Protein Coding	O14757	60	GC11P125625	3.60944	https://www.genecards.org/cgi-bin/carddisp.pl?gene=CHEK1
CYRIB	CYFIP Related Rac1 Interactor B	Protein Coding	Q9NUQ9	41	GC08M135872	3.58464	https://www.genecards.org/cgi-bin/carddisp.pl?gene=CYRIB
EIF1AD	Eukaryotic Translation Initiation Factor 1A Domain Containing	Protein Coding	Q8N9N8	37	GC11M065996	3.58464	https://www.genecards.org/cgi-bin/carddisp.pl?gene=EIF1AD
PSMB5	Proteasome 20S Subunit Beta 5	Protein Coding	P28074	52	GC14M023016	3.58222	https://www.genecards.org/cgi-bin/carddisp.pl?gene=PSMB5
C11orf65	Chromosome 11 Open Reading Frame 65	Protein Coding	Q8NCR3	40	GC11M108308	3.57891	https://www.genecards.org/cgi-bin/carddisp.pl?gene=C11orf65
MAPK8IP1	Mitogen-Activated Protein Kinase 8 Interacting Protein 1	Protein Coding	Q9UQF2	53	GC11P047713	3.57869	https://www.genecards.org/cgi-bin/carddisp.pl?gene=MAPK8IP1
FANCC	FA Complementation Group C	Protein Coding	Q00597	56	GC09M095099	3.57342	https://www.genecards.org/cgi-bin/carddisp.pl?gene=FANCC
SLC1A2	Solute Carrier Family 1 Member 2	Protein Coding	P43004	59	GC11M035267	3.568	https://www.genecards.org/cgi-bin/carddisp.pl?gene=SLC1A2
PAK2	P21 (RAC1) Activated Kinase 2	Protein Coding	Q13177	56	GC03P196739	3.56619	https://www.genecards.org/cgi-bin/carddisp.pl?gene=PAK2
TRPV1	Transient Receptor Potential Cation Channel Subfamily V Member 1	Protein Coding	Q8NER1	56	GC17M003565	3.561	https://www.genecards.org/cgi-bin/carddisp.pl?gene=TRPV1
FTMT	Ferritin Mitochondrial	Protein Coding	Q8N4E7	46	GC05P121851	3.55248	https://www.genecards.org/cgi-bin/carddisp.pl?gene=FTMT
FUS	FUS RNA Binding Protein	Protein Coding	P35637	54	GC16P031180	3.54978	https://www.genecards.org/cgi-bin/carddisp.pl?gene=FUS
EIF2AK1	Eukaryotic Translation Initiation Factor 2 Alpha Kinase 1	Protein Coding	Q9BQI3	53	GC07M006022	3.54884	https://www.genecards.org/cgi-bin/carddisp.pl?gene=EIF2AK1
MAP3K1	Mitogen-Activated Protein Kinase Kinase Kinase 1	Protein Coding	Q13233	58	GC05P056815	3.54733	https://www.genecards.org/cgi-bin/carddisp.pl?gene=MAP3K1
NDUFAB1	NADH:Ubiquinone Oxidoreductase Subunit AB1	Protein Coding	O14561	49	GC16M025408	3.54733	https://www.genecards.org/cgi-bin/carddisp.pl?gene=NDUFAB1
PSMA7	Proteasome 20S Subunit Alpha 7	Protein Coding	O14818	53	GC20M062136	3.54575	https://www.genecards.org/cgi-bin/carddisp.pl?gene=PSMA7
SLPI	Secretory Leukocyte Peptidase Inhibitor	Protein Coding	P03973	50	GC20M045252	3.54348	https://www.genecards.org/cgi-bin/carddisp.pl?gene=SLPI
FH	Fumarate Hydratase	Protein Coding	P07954	55	GC01M241499	3.542	https://www.genecards.org/cgi-bin/carddisp.pl?gene=FH
SLC1A3	Solute Carrier Family 1 Member 3	Protein Coding	P43003	57	GC05P036687	3.54156	https://www.genecards.org/cgi-bin/carddisp.pl?gene=SLC1A3
MAP4K4	Mitogen-Activated Protein Kinase Kinase Kinase Kinase 4	Protein Coding	O95819	55	GC02P101696	3.54081	https://www.genecards.org/cgi-bin/carddisp.pl?gene=MAP4K4
HDAC4	Histone Deacetylase 4	Protein Coding	P56524	61	GC02M239048	3.53432	https://www.genecards.org/cgi-bin/carddisp.pl?gene=HDAC4
NAT2	N-Acetyltransferase 2	Protein Coding	P11245	51	GC08P018391	3.53329	https://www.genecards.org/cgi-bin/carddisp.pl?gene=NAT2
LIG3	DNA Ligase 3	Protein Coding	P49916	53	GC17P034980	3.52197	https://www.genecards.org/cgi-bin/carddisp.pl?gene=LIG3
TP63	Tumor Protein P63	Protein Coding	Q9H3D4	55	GC03P189598	3.51994	https://www.genecards.org/cgi-bin/carddisp.pl?gene=TP63
CCL4	C-C Motif Chemokine Ligand 4	Protein Coding	P13236	50	GC17P036103	3.50985	https://www.genecards.org/cgi-bin/carddisp.pl?gene=CCL4
NPY	Neuropeptide Y	Protein Coding	P01303	53	GC07P024290	3.50922	https://www.genecards.org/cgi-bin/carddisp.pl?gene=NPY
FBXO32	F-Box Protein 32	Protein Coding	Q969P5	48	GC08M123604	3.50922	https://www.genecards.org/cgi-bin/carddisp.pl?gene=FBXO32
PDIA3	Protein Disulfide Isomerase Family A Member 3	Protein Coding	P30101	52	GC15P043746	3.50109	https://www.genecards.org/cgi-bin/carddisp.pl?gene=PDIA3
HMGCR	3-Hydroxy-3-Methylglutaryl-CoA Reductase	Protein Coding	P04035	56	GC05P075336	3.5005	https://www.genecards.org/cgi-bin/carddisp.pl?gene=HMGCR
HSPB2	Heat Shock Protein Family B (Small) Member 2	Protein Coding	Q16082	48	GC11P112498	3.49937	https://www.genecards.org/cgi-bin/carddisp.pl?gene=HSPB2
FANCG	FA Complementation Group G	Protein Coding	O15287	52	GC09M035073	3.49548	https://www.genecards.org/cgi-bin/carddisp.pl?gene=FANCG
ALDH1A1	Aldehyde Dehydrogenase 1 Family Member A1	Protein Coding	P00352	56	GC09M072900	3.49099	https://www.genecards.org/cgi-bin/carddisp.pl?gene=ALDH1A1
CREBBP	CREB Binding Protein	Protein Coding	Q92793	62	GC16M020489	3.48602	https://www.genecards.org/cgi-bin/carddisp.pl?gene=CREBBP
CEBPB	CCAAT Enhancer Binding Protein Beta	Protein Coding	P17676	53	GC20P050190	3.48602	https://www.genecards.org/cgi-bin/carddisp.pl?gene=CEBPB
RCC2	Regulator Of Chromosome Condensation 2	Protein Coding	Q9P258	43	GC01M017406	3.48337	https://www.genecards.org/cgi-bin/carddisp.pl?gene=RCC2
GLS	Glutaminase	Protein Coding	O94925	58	GC02P190880	3.48154	https://www.genecards.org/cgi-bin/carddisp.pl?gene=GLS
GPX6	Glutathione Peroxidase 6	Protein Coding	P59796	43	GC06M028503	3.47641	https://www.genecards.org/cgi-bin/carddisp.pl?gene=GPX6
SDHC	Succinate Dehydrogenase Complex Subunit C	Protein Coding	Q99643	51	GC01P161314	3.47217	https://www.genecards.org/cgi-bin/carddisp.pl?gene=SDHC
CD40	CD40 Molecule	Protein Coding	P25942	59	GC20P046118	3.46722	https://www.genecards.org/cgi-bin/carddisp.pl?gene=CD40
GCH1	GTP Cyclohydrolase 1	Protein Coding	P30793	56	GC14M054842	3.46502	https://www.genecards.org/cgi-bin/carddisp.pl?gene=GCH1
MPST	Mercaptopyruvate Sulfurtransferase	Protein Coding	P25325	49	GC22P037019	3.46167	https://www.genecards.org/cgi-bin/carddisp.pl?gene=MPST
TLR3	Toll Like Receptor 3	Protein Coding	O15455	60	GC04P186059	3.45991	https://www.genecards.org/cgi-bin/carddisp.pl?gene=TLR3
TSPO	Translocator Protein	Protein Coding	B1AH88	53	GC22P043151	3.45782	https://www.genecards.org/cgi-bin/carddisp.pl?gene=TSPO
ITGB3	Integrin Subunit Beta 3	Protein Coding	P05106	61	GC17P112532	3.45766	https://www.genecards.org/cgi-bin/carddisp.pl?gene=ITGB3
REG3A	Regenerating Family Member 3 Alpha	Protein Coding	Q06141	46	GC02M079157	3.45644	https://www.genecards.org/cgi-bin/carddisp.pl?gene=REG3A
CHD6	Chromodomain Helicase DNA Binding Protein 6	Protein Coding	Q8TD26	46	GC20M041402	3.45429	https://www.genecards.org/cgi-bin/carddisp.pl?gene=CHD6
NDUFA9	NADH:Ubiquinone Oxidoreductase Subunit A9	Protein Coding	Q16795	52	GC12P004649	3.45092	https://www.genecards.org/cgi-bin/carddisp.pl?gene=NDUFA9
TP53INP1	Tumor Protein P53 Inducible Nuclear Protein 1	Protein Coding	Q96A56	41	GC08M094925	3.44646	https://www.genecards.org/cgi-bin/carddisp.pl?gene=TP53INP1
MC1R	Melanocortin 1 Receptor	Protein Coding	Q01726	56	GC16P089912	3.44637	https://www.genecards.org/cgi-bin/carddisp.pl?gene=MC1R
NCF1	Neutrophil Cytosolic Factor 1	Protein Coding	P14598	55	GC07P086277	3.43262	https://www.genecards.org/cgi-bin/carddisp.pl?gene=NCF1
F2	Coagulation Factor II, Thrombin	Protein Coding	P00734	59	GC11P047736	3.43081	https://www.genecards.org/cgi-bin/carddisp.pl?gene=F2
BTRC	Beta-Transducin Repeat Containing E3 Ubiquitin Protein Ligase	Protein Coding	Q9Y297	53	GC10P101354	3.43081	https://www.genecards.org/cgi-bin/carddisp.pl?gene=BTRC
GSTA3	Glutathione S-Transferase Alpha 3	Protein Coding	Q16772	48	GC06M052896	3.43081	https://www.genecards.org/cgi-bin/carddisp.pl?gene=GSTA3
KRT1	Keratin 1	Protein Coding	P04264	56	GC12M052674	3.42956	https://www.genecards.org/cgi-bin/carddisp.pl?gene=KRT1
DIABLO	Diablo IAP-Binding Mitochondrial Protein	Protein Coding	Q9NR28	54	GC12M123647	3.42204	https://www.genecards.org/cgi-bin/carddisp.pl?gene=DIABLO
GFER	Growth Factor, Augmenter Of Liver Regeneration	Protein Coding	P55789	53	GC16P001984	3.42096	https://www.genecards.org/cgi-bin/carddisp.pl?gene=GFER
NR1H2	Nuclear Receptor Subfamily 1 Group H Member 2	Protein Coding	P55055	54	GC19P050329	3.41601	https://www.genecards.org/cgi-bin/carddisp.pl?gene=NR1H2
NAT1	N-Acetyltransferase 1	Protein Coding	P18440	53	GC08P018183	3.4121	https://www.genecards.org/cgi-bin/carddisp.pl?gene=NAT1
RAN	RAN, Member RAS Oncogene Family	Protein Coding	P62826	52	GC12P133472	3.40743	https://www.genecards.org/cgi-bin/carddisp.pl?gene=RAN
DDIT4	DNA Damage Inducible Transcript 4	Protein Coding	Q9NX09	47	GC10P072273	3.4029	https://www.genecards.org/cgi-bin/carddisp.pl?gene=DDIT4
CDH1	Cadherin 1	Protein Coding	P12830	58	GC16P068737	3.40179	https://www.genecards.org/cgi-bin/carddisp.pl?gene=CDH1
MGAT3	Beta-1,4-Mannosyl-Glycoprotein 4-Beta-N-Acetylglucosaminyltransferase	Protein Coding	Q09327	47	GC22P070618	3.39988	https://www.genecards.org/cgi-bin/carddisp.pl?gene=MGAT3
RAD51	RAD51 Recombinase	Protein Coding	Q06609	59	GC15P040694	3.3946	https://www.genecards.org/cgi-bin/carddisp.pl?gene=RAD51
CHRM2	Cholinergic Receptor Muscarinic 2	Protein Coding	P08172	56	GC07P136868	3.39324	https://www.genecards.org/cgi-bin/carddisp.pl?gene=CHRM2
RBBP7	RB Binding Protein 7, Chromatin Remodeling Factor	Protein Coding	Q16576	49	GC0XM016839	3.39085	https://www.genecards.org/cgi-bin/carddisp.pl?gene=RBBP7
TYRP1	Tyrosinase Related Protein 1	Protein Coding	P17643	55	GC09P012683	3.39031	https://www.genecards.org/cgi-bin/carddisp.pl?gene=TYRP1
HBA1	Hemoglobin Subunit Alpha 1	Protein Coding	P69905	51	GC16P080149	3.39031	https://www.genecards.org/cgi-bin/carddisp.pl?gene=HBA1
EZR	Ezrin	Protein Coding	P15311	54	GC06M158765	3.38885	https://www.genecards.org/cgi-bin/carddisp.pl?gene=EZR
PIK3CB	Phosphatidylinositol-4,5-Bisphosphate 3-Kinase Catalytic Subunit Beta	Protein Coding	P42338	56	GC03M138652	3.38425	https://www.genecards.org/cgi-bin/carddisp.pl?gene=PIK3CB
ZNF622	Zinc Finger Protein 622	Protein Coding	Q969S3	40	GC05M016451	3.38071	https://www.genecards.org/cgi-bin/carddisp.pl?gene=ZNF622
NPPA	Natriuretic Peptide A	Protein Coding	P01160	53	GC01M014524	3.37941	https://www.genecards.org/cgi-bin/carddisp.pl?gene=NPPA
MAFA	MAF BZIP Transcription Factor A	Protein Coding	Q8NHW3	49	GC08M143419	3.37365	https://www.genecards.org/cgi-bin/carddisp.pl?gene=MAFA
NDUFC2	NADH:Ubiquinone Oxidoreductase Subunit C2	Protein Coding	O95298	48	GC11M078068	3.37365	https://www.genecards.org/cgi-bin/carddisp.pl?gene=NDUFC2
ARG1	Arginase 1	Protein Coding	P05089	58	GC06P136455	3.37284	https://www.genecards.org/cgi-bin/carddisp.pl?gene=ARG1
FN1	Fibronectin 1	Protein Coding	P02751	59	GC02M215360	3.37013	https://www.genecards.org/cgi-bin/carddisp.pl?gene=FN1
PTPN6	Protein Tyrosine Phosphatase Non-Receptor Type 6	Protein Coding	P29350	58	GC12P038993	3.36967	https://www.genecards.org/cgi-bin/carddisp.pl?gene=PTPN6
HUWE1	HECT, UBA And WWE Domain Containing E3 Ubiquitin Protein Ligase 1	Protein Coding	Q7Z6Z7	55	GC0XM053532	3.36723	https://www.genecards.org/cgi-bin/carddisp.pl?gene=HUWE1
UNG	Uracil DNA Glycosylase	Protein Coding	P13051	55	GC12P109097	3.36691	https://www.genecards.org/cgi-bin/carddisp.pl?gene=UNG
TIA1	TIA1 Cytotoxic Granule Associated RNA Binding Protein	Protein Coding	P31483	51	GC02M070209	3.36691	https://www.genecards.org/cgi-bin/carddisp.pl?gene=TIA1
ERCC5	ERCC Excision Repair 5, Endonuclease	Protein Coding	P28715	53	GC13P102845	3.36689	https://www.genecards.org/cgi-bin/carddisp.pl?gene=ERCC5
SLC6A6	Solute Carrier Family 6 Member 6	Protein Coding	P31641	51	GC03P014402	3.36515	https://www.genecards.org/cgi-bin/carddisp.pl?gene=SLC6A6
IL17A	Interleukin 17A	Protein Coding	Q16552	52	GC06P052186	3.355	https://www.genecards.org/cgi-bin/carddisp.pl?gene=IL17A
ITIH4	Inter-Alpha-Trypsin Inhibitor Heavy Chain 4	Protein Coding	Q14624	51	GC03M052812	3.355	https://www.genecards.org/cgi-bin/carddisp.pl?gene=ITIH4
HSPA6	Heat Shock Protein Family A (Hsp70) Member 6	Protein Coding	P17066	51	GC01P161524	3.35355	https://www.genecards.org/cgi-bin/carddisp.pl?gene=HSPA6
NDUFB8	NADH:Ubiquinone Oxidoreductase Subunit B8	Protein Coding	O95169	51	GC10M100523	3.35355	https://www.genecards.org/cgi-bin/carddisp.pl?gene=NDUFB8
SERPINA4	Serpin Family A Member 4	Protein Coding	P29622	48	GC14P094561	3.35318	https://www.genecards.org/cgi-bin/carddisp.pl?gene=SERPINA4
RYR1	Ryanodine Receptor 1	Protein Coding	P21817	56	GC19P113006	3.34562	https://www.genecards.org/cgi-bin/carddisp.pl?gene=RYR1
GRB2	Growth Factor Receptor Bound Protein 2	Protein Coding	P62993	55	GC17M075318	3.34557	https://www.genecards.org/cgi-bin/carddisp.pl?gene=GRB2
GSTA5	Glutathione S-Transferase Alpha 5	Protein Coding	Q7RTV2	41	GC06M052831	3.33288	https://www.genecards.org/cgi-bin/carddisp.pl?gene=GSTA5
PIN1	Peptidylprolyl Cis/Trans Isomerase, NIMA-Interacting 1	Protein Coding	Q13526	56	GC19P009835	3.32581	https://www.genecards.org/cgi-bin/carddisp.pl?gene=PIN1
H2AC4	H2A Clustered Histone 4	Protein Coding	P04908	41	GC06M093423	3.32532	https://www.genecards.org/cgi-bin/carddisp.pl?gene=H2AC4
AK4	Adenylate Kinase 4	Protein Coding	P27144	46	GC01P065147	3.32478	https://www.genecards.org/cgi-bin/carddisp.pl?gene=AK4
ABCA1	ATP Binding Cassette Subfamily A Member 1	Protein Coding	O95477	58	GC09M104781	3.32365	https://www.genecards.org/cgi-bin/carddisp.pl?gene=ABCA1
GCG	Glucagon	Protein Coding	P01275	51	GC02M162142	3.32365	https://www.genecards.org/cgi-bin/carddisp.pl?gene=GCG
BBC3	BCL2 Binding Component 3	Protein Coding	Q96PG8	49	GC19M047220	3.32343	https://www.genecards.org/cgi-bin/carddisp.pl?gene=BBC3
IL4	Interleukin 4	Protein Coding	P05112	55	GC05P132673	3.32064	https://www.genecards.org/cgi-bin/carddisp.pl?gene=IL4
MT-ATP6	Mitochondrially Encoded ATP Synthase Membrane Subunit 6	Protein Coding	P00846	41	GCMTP008531	3.31812	https://www.genecards.org/cgi-bin/carddisp.pl?gene=MT-ATP6
CTSS	Cathepsin S	Protein Coding	P25774	55	GC01M150730	3.31159	https://www.genecards.org/cgi-bin/carddisp.pl?gene=CTSS
FGF21	Fibroblast Growth Factor 21	Protein Coding	Q9NSA1	48	GC19P113390	3.31018	https://www.genecards.org/cgi-bin/carddisp.pl?gene=FGF21
IDE	Insulin Degrading Enzyme	Protein Coding	P14735	57	GC10M092451	3.30777	https://www.genecards.org/cgi-bin/carddisp.pl?gene=IDE
ST3GAL4	ST3 Beta-Galactoside Alpha-2,3-Sialyltransferase 4	Protein Coding	Q11206	51	GC11P126355	3.30479	https://www.genecards.org/cgi-bin/carddisp.pl?gene=ST3GAL4
FKBP4	FKBP Prolyl Isomerase 4	Protein Coding	Q02790	53	GC12P003347	3.30433	https://www.genecards.org/cgi-bin/carddisp.pl?gene=FKBP4
WRN	WRN RecQ Like Helicase	Protein Coding	Q14191	56	GC08P031033	3.30312	https://www.genecards.org/cgi-bin/carddisp.pl?gene=WRN
STK3	Serine/Threonine Kinase 3	Protein Coding	Q13188	47	GC08M098343	3.29618	https://www.genecards.org/cgi-bin/carddisp.pl?gene=STK3
NR1I2	Nuclear Receptor Subfamily 1 Group I Member 2	Protein Coding	O75469	52	GC03P119780	3.29195	https://www.genecards.org/cgi-bin/carddisp.pl?gene=NR1I2
CYLD	CYLD Lysine 63 Deubiquitinase	Protein Coding	Q9NQC7	56	GC16P050742	3.28962	https://www.genecards.org/cgi-bin/carddisp.pl?gene=CYLD
PIM1	Pim-1 Proto-Oncogene, Serine/Threonine Kinase	Protein Coding	P11309	58	GC06P134993	3.28961	https://www.genecards.org/cgi-bin/carddisp.pl?gene=PIM1
RING1	Ring Finger Protein 1	Protein Coding	Q06587	48	GC06P033208	3.28841	https://www.genecards.org/cgi-bin/carddisp.pl?gene=RING1
CSNK1D	Casein Kinase 1 Delta	Protein Coding	P48730	58	GC17M082239	3.28819	https://www.genecards.org/cgi-bin/carddisp.pl?gene=CSNK1D
NDUFS3	NADH:Ubiquinone Oxidoreductase Core Subunit S3	Protein Coding	O75489	54	GC11P047791	3.28819	https://www.genecards.org/cgi-bin/carddisp.pl?gene=NDUFS3
HSPA1L	Heat Shock Protein Family A (Hsp70) Member 1 Like	Protein Coding	P34931	51	GC06M031809	3.28819	https://www.genecards.org/cgi-bin/carddisp.pl?gene=HSPA1L
GADD45A	Growth Arrest And DNA Damage Inducible Alpha	Protein Coding	P24522	52	GC01P067685	3.28801	https://www.genecards.org/cgi-bin/carddisp.pl?gene=GADD45A
INPP5D	Inositol Polyphosphate-5-Phosphatase D	Protein Coding	Q92835	52	GC02P233059	3.28766	https://www.genecards.org/cgi-bin/carddisp.pl?gene=INPP5D
BCL2A1	BCL2 Related Protein A1	Protein Coding	Q16548	50	GC15M148332	3.28697	https://www.genecards.org/cgi-bin/carddisp.pl?gene=BCL2A1
TNFSF11	TNF Superfamily Member 11	Protein Coding	O14788	58	GC13P042562	3.2835	https://www.genecards.org/cgi-bin/carddisp.pl?gene=TNFSF11
ELN	Elastin	Protein Coding	P15502	52	GC07P074027	3.27944	https://www.genecards.org/cgi-bin/carddisp.pl?gene=ELN
HAO1	Hydroxyacid Oxidase 1	Protein Coding	Q9UJM8	47	GC20M009781	3.27648	https://www.genecards.org/cgi-bin/carddisp.pl?gene=HAO1
EIF4EBP1	Eukaryotic Translation Initiation Factor 4E Binding Protein 1	Protein Coding	Q13541	54	GC08P039851	3.2733	https://www.genecards.org/cgi-bin/carddisp.pl?gene=EIF4EBP1
TOMM70	Translocase Of Outer Mitochondrial Membrane 70	Protein Coding	O94826	44	GC03M100364	3.26883	https://www.genecards.org/cgi-bin/carddisp.pl?gene=TOMM70
NDUFV2	NADH:Ubiquinone Oxidoreductase Core Subunit V2	Protein Coding	P19404	52	GC18P009106	3.26809	https://www.genecards.org/cgi-bin/carddisp.pl?gene=NDUFV2
HSPA2	Heat Shock Protein Family A (Hsp70) Member 2	Protein Coding	P54652	51	GC14P064535	3.26809	https://www.genecards.org/cgi-bin/carddisp.pl?gene=HSPA2
NDUFA8	NADH:Ubiquinone Oxidoreductase Subunit A8	Protein Coding	P51970	51	GC09M122132	3.26809	https://www.genecards.org/cgi-bin/carddisp.pl?gene=NDUFA8
NDUFS6	NADH:Ubiquinone Oxidoreductase Subunit S6	Protein Coding	O75380	51	GC05P001801	3.26809	https://www.genecards.org/cgi-bin/carddisp.pl?gene=NDUFS6
NDUFA7	NADH:Ubiquinone Oxidoreductase Subunit A7	Protein Coding	O95182	45	GC19M008308	3.26809	https://www.genecards.org/cgi-bin/carddisp.pl?gene=NDUFA7
HSPA12A	Heat Shock Protein Family A (Hsp70) Member 12A	Protein Coding	O43301	44	GC10M116671	3.26809	https://www.genecards.org/cgi-bin/carddisp.pl?gene=HSPA12A
IL12B	Interleukin 12B	Protein Coding	P29460	54	GC05M159314	3.26691	https://www.genecards.org/cgi-bin/carddisp.pl?gene=IL12B
CBR1	Carbonyl Reductase 1	Protein Coding	P16152	52	GC21P036069	3.26572	https://www.genecards.org/cgi-bin/carddisp.pl?gene=CBR1
SP3	Sp3 Transcription Factor	Protein Coding	Q02447	51	GC02M173882	3.26572	https://www.genecards.org/cgi-bin/carddisp.pl?gene=SP3
UBE2I	Ubiquitin Conjugating Enzyme E2 I	Protein Coding	P63279	56	GC16P080184	3.25933	https://www.genecards.org/cgi-bin/carddisp.pl?gene=UBE2I
ATG4B	Autophagy Related 4B Cysteine Peptidase	Protein Coding	Q9Y4P1	45	GC02P241637	3.25431	https://www.genecards.org/cgi-bin/carddisp.pl?gene=ATG4B
BTK	Bruton Tyrosine Kinase	Protein Coding	Q06187	62	GC0XM101349	3.25294	https://www.genecards.org/cgi-bin/carddisp.pl?gene=BTK
THG1L	TRNA-Histidine Guanylyltransferase 1 Like	Protein Coding	Q9NWX6	46	GC05P157731	3.2503	https://www.genecards.org/cgi-bin/carddisp.pl?gene=THG1L
FABP1	Fatty Acid Binding Protein 1	Protein Coding	P07148	52	GC02M088122	3.24799	https://www.genecards.org/cgi-bin/carddisp.pl?gene=FABP1
COL1A2	Collagen Type I Alpha 2 Chain	Protein Coding	P08123	56	GC07P094394	3.24741	https://www.genecards.org/cgi-bin/carddisp.pl?gene=COL1A2
HTR2A	5-Hydroxytryptamine Receptor 2A	Protein Coding	P28223	56	GC13M046831	3.24741	https://www.genecards.org/cgi-bin/carddisp.pl?gene=HTR2A
COQ2	Coenzyme Q2, Polyprenyltransferase	Protein Coding	Q96H96	50	GC04M083261	3.24741	https://www.genecards.org/cgi-bin/carddisp.pl?gene=COQ2
DEGS1	Delta 4-Desaturase, Sphingolipid 1	Protein Coding	O15121	50	GC01P224175	3.24741	https://www.genecards.org/cgi-bin/carddisp.pl?gene=DEGS1
F3	Coagulation Factor III, Tissue Factor	Protein Coding	P13726	54	GC01M094873	3.24724	https://www.genecards.org/cgi-bin/carddisp.pl?gene=F3
DKC1	Dyskerin Pseudouridine Synthase 1	Protein Coding	O60832	55	GC0XP154762	3.24337	https://www.genecards.org/cgi-bin/carddisp.pl?gene=DKC1
AIF1	Allograft Inflammatory Factor 1	Protein Coding	P55008	48	GC06P134819	3.23957	https://www.genecards.org/cgi-bin/carddisp.pl?gene=AIF1
ENO2	Enolase 2	Protein Coding	P09104	56	GC12P006913	3.23883	https://www.genecards.org/cgi-bin/carddisp.pl?gene=ENO2
VHL	Von Hippel-Lindau Tumor Suppressor	Protein Coding	P40337	56	GC03P021526	3.23608	https://www.genecards.org/cgi-bin/carddisp.pl?gene=VHL
SELENOW	Selenoprotein W	Protein Coding	P63302	38	GC19P113347	3.23157	https://www.genecards.org/cgi-bin/carddisp.pl?gene=SELENOW
MT-CO1	Mitochondrially Encoded Cytochrome C Oxidase I	Protein Coding	P00395	41	GCMTP005906	3.22682	https://www.genecards.org/cgi-bin/carddisp.pl?gene=MT-CO1
CTSZ	Cathepsin Z	Protein Coding	Q9UBR2	53	GC20M058995	3.22612	https://www.genecards.org/cgi-bin/carddisp.pl?gene=CTSZ
CTSH	Cathepsin H	Protein Coding	P09668	52	GC15M148321	3.22612	https://www.genecards.org/cgi-bin/carddisp.pl?gene=CTSH
NDUFB9	NADH:Ubiquinone Oxidoreductase Subunit B9	Protein Coding	Q9Y6M9	52	GC08P124539	3.22612	https://www.genecards.org/cgi-bin/carddisp.pl?gene=NDUFB9
DNAJB2	DnaJ Heat Shock Protein Family (Hsp40) Member B2	Protein Coding	P25686	51	GC02P219279	3.22612	https://www.genecards.org/cgi-bin/carddisp.pl?gene=DNAJB2
NDUFA10	NADH:Ubiquinone Oxidoreductase Subunit A10	Protein Coding	O95299	51	GC02M239893	3.22612	https://www.genecards.org/cgi-bin/carddisp.pl?gene=NDUFA10
NDUFB10	NADH:Ubiquinone Oxidoreductase Subunit B10	Protein Coding	O96000	51	GC16P080234	3.22612	https://www.genecards.org/cgi-bin/carddisp.pl?gene=NDUFB10
NDUFB7	NADH:Ubiquinone Oxidoreductase Subunit B7	Protein Coding	P17568	48	GC19M014566	3.22612	https://www.genecards.org/cgi-bin/carddisp.pl?gene=NDUFB7
NDUFV3	NADH:Ubiquinone Oxidoreductase Subunit V3	Protein Coding	P56181	47	GC21P042879	3.22612	https://www.genecards.org/cgi-bin/carddisp.pl?gene=NDUFV3
SAA2	Serum Amyloid A2	Protein Coding	P0DJI9	45	GC11M018238	3.22612	https://www.genecards.org/cgi-bin/carddisp.pl?gene=SAA2
NDUFA3	NADH:Ubiquinone Oxidoreductase Subunit A3	Protein Coding	O95167	44	GC19P054102	3.22612	https://www.genecards.org/cgi-bin/carddisp.pl?gene=NDUFA3
HSPA12B	Heat Shock Protein Family A (Hsp70) Member 12B	Protein Coding	Q96MM6	39	GC20P008164	3.22612	https://www.genecards.org/cgi-bin/carddisp.pl?gene=HSPA12B
NDUFB5	NADH:Ubiquinone Oxidoreductase Subunit B5	Protein Coding	O43674	39	GC03P179604	3.22612	https://www.genecards.org/cgi-bin/carddisp.pl?gene=NDUFB5
PCK1	Phosphoenolpyruvate Carboxykinase 1	Protein Coding	P35558	56	GC20P057561	3.2246	https://www.genecards.org/cgi-bin/carddisp.pl?gene=PCK1
ALDH3A2	Aldehyde Dehydrogenase 3 Family Member A2	Protein Coding	P51648	54	GC17P019648	3.21891	https://www.genecards.org/cgi-bin/carddisp.pl?gene=ALDH3A2
SAA4	Serum Amyloid A4, Constitutive	Protein Coding	P35542	47	GC11M018234	3.21737	https://www.genecards.org/cgi-bin/carddisp.pl?gene=SAA4
CCL20	C-C Motif Chemokine Ligand 20	Protein Coding	P78556	51	GC02P227846	3.21591	https://www.genecards.org/cgi-bin/carddisp.pl?gene=CCL20
H2BC12L	H2B Clustered Histone 12 Like	Protein Coding	P57053	30	GC21P043589	3.21591	https://www.genecards.org/cgi-bin/carddisp.pl?gene=H2BC12L
PTX3	Pentraxin 3	Protein Coding	P26022	51	GC03P157436	3.21339	https://www.genecards.org/cgi-bin/carddisp.pl?gene=PTX3
PRKDC	Protein Kinase, DNA-Activated, Catalytic Subunit	Protein Coding	P78527	59	GC08M047773	3.20838	https://www.genecards.org/cgi-bin/carddisp.pl?gene=PRKDC
ABCC2	ATP Binding Cassette Subfamily C Member 2	Protein Coding	Q92887	57	GC10P099782	3.20838	https://www.genecards.org/cgi-bin/carddisp.pl?gene=ABCC2
HAX1	HCLS1 Associated Protein X-1	Protein Coding	O00165	51	GC01P164481	3.20838	https://www.genecards.org/cgi-bin/carddisp.pl?gene=HAX1
NME5	NME/NM23 Family Member 5	Protein Coding	P56597	46	GC05M138115	3.20777	https://www.genecards.org/cgi-bin/carddisp.pl?gene=NME5
IPCEF1	Interaction Protein For Cytohesin Exchange Factors 1	Protein Coding	Q8WWN9	39	GC06M154154	3.20777	https://www.genecards.org/cgi-bin/carddisp.pl?gene=IPCEF1
PPIG	Peptidylprolyl Isomerase G	Protein Coding	Q13427	50	GC02P169584	3.20267	https://www.genecards.org/cgi-bin/carddisp.pl?gene=PPIG
TRIM63	Tripartite Motif Containing 63	Protein Coding	Q969Q1	49	GC01M031027	3.20124	https://www.genecards.org/cgi-bin/carddisp.pl?gene=TRIM63
NONO	Non-POU Domain Containing Octamer Binding	Protein Coding	Q15233	53	GC0XP071259	3.19849	https://www.genecards.org/cgi-bin/carddisp.pl?gene=NONO
HSD17B10	Hydroxysteroid 17-Beta Dehydrogenase 10	Protein Coding	Q99714	55	GC0XM053431	3.19818	https://www.genecards.org/cgi-bin/carddisp.pl?gene=HSD17B10
COL2A1	Collagen Type II Alpha 1 Chain	Protein Coding	P02458	58	GC12M047972	3.19719	https://www.genecards.org/cgi-bin/carddisp.pl?gene=COL2A1
EXOC6	Exocyst Complex Component 6	Protein Coding	Q8TAG9	47	GC10P092826	3.19719	https://www.genecards.org/cgi-bin/carddisp.pl?gene=EXOC6
CD14	CD14 Molecule	Protein Coding	P08571	54	GC05M140631	3.1954	https://www.genecards.org/cgi-bin/carddisp.pl?gene=CD14
ERCC3	ERCC Excision Repair 3, TFIIH Core Complex Helicase Subunit	Protein Coding	P19447	55	GC02M127257	3.19536	https://www.genecards.org/cgi-bin/carddisp.pl?gene=ERCC3
PNPT1	Polyribonucleotide Nucleotidyltransferase 1	Protein Coding	Q8TCS8	52	GC02M055634	3.19536	https://www.genecards.org/cgi-bin/carddisp.pl?gene=PNPT1
HACE1	HECT Domain And Ankyrin Repeat Containing E3 Ubiquitin Protein Ligase 1	Protein Coding	Q8IYU2	49	GC06M104728	3.18845	https://www.genecards.org/cgi-bin/carddisp.pl?gene=HACE1
NQO2	N-Ribosyldihydronicotinamide:Quinone Dehydrogenase 2	Protein Coding	P16083	54	GC06P006437	3.18336	https://www.genecards.org/cgi-bin/carddisp.pl?gene=NQO2
DUSP19	Dual Specificity Phosphatase 19	Protein Coding	Q8WTR2	45	GC02P183078	3.17874	https://www.genecards.org/cgi-bin/carddisp.pl?gene=DUSP19
SLC19A1	Solute Carrier Family 19 Member 1	Protein Coding	P41440	55	GC21M045493	3.16671	https://www.genecards.org/cgi-bin/carddisp.pl?gene=SLC19A1
ACOX1	Acyl-CoA Oxidase 1	Protein Coding	Q15067	54	GC17M075941	3.15864	https://www.genecards.org/cgi-bin/carddisp.pl?gene=ACOX1
SCARB1	Scavenger Receptor Class B Member 1	Protein Coding	Q8WTV0	56	GC12M124776	3.15836	https://www.genecards.org/cgi-bin/carddisp.pl?gene=SCARB1
RBX1	Ring-Box 1	Protein Coding	P62877	52	GC22P040951	3.15303	https://www.genecards.org/cgi-bin/carddisp.pl?gene=RBX1
TGFA	Transforming Growth Factor Alpha	Protein Coding	P01135	54	GC02M070447	3.14632	https://www.genecards.org/cgi-bin/carddisp.pl?gene=TGFA
H2BC21	H2B Clustered Histone 21	Protein Coding	Q16778	48	GC01M160728	3.14628	https://www.genecards.org/cgi-bin/carddisp.pl?gene=H2BC21
COQ8A	Coenzyme Q8A	Protein Coding	Q8NI60	52	GC01P226939	3.13865	https://www.genecards.org/cgi-bin/carddisp.pl?gene=COQ8A
MYB	MYB Proto-Oncogene, Transcription Factor	Protein Coding	P10242	56	GC06P135181	3.13863	https://www.genecards.org/cgi-bin/carddisp.pl?gene=MYB
IDH2	Isocitrate Dehydrogenase (NADP(+)) 2	Protein Coding	P48735	60	GC15M090083	3.13797	https://www.genecards.org/cgi-bin/carddisp.pl?gene=IDH2
PLAUR	Plasminogen Activator, Urokinase Receptor	Protein Coding	Q03405	53	GC19M043646	3.13797	https://www.genecards.org/cgi-bin/carddisp.pl?gene=PLAUR
FOXL2	Forkhead Box L2	Protein Coding	P58012	50	GC03M138944	3.13691	https://www.genecards.org/cgi-bin/carddisp.pl?gene=FOXL2
COL1A1	Collagen Type I Alpha 1 Chain	Protein Coding	P02452	58	GC17M078201	3.13112	https://www.genecards.org/cgi-bin/carddisp.pl?gene=COL1A1
PTMA	Prothymosin Alpha	Protein Coding	P06454	50	GC02P232724	3.12912	https://www.genecards.org/cgi-bin/carddisp.pl?gene=PTMA
ERBB2	Erb-B2 Receptor Tyrosine Kinase 2	Protein Coding	P04626	63	GC17P039687	3.12469	https://www.genecards.org/cgi-bin/carddisp.pl?gene=ERBB2
PIK3C2A	Phosphatidylinositol-4-Phosphate 3-Kinase Catalytic Subunit Type 2 Alpha	Protein Coding	O00443	55	GC11M017940	3.12469	https://www.genecards.org/cgi-bin/carddisp.pl?gene=PIK3C2A
IL33	Interleukin 33	Protein Coding	O95760	48	GC09P009214	3.12435	https://www.genecards.org/cgi-bin/carddisp.pl?gene=IL33
JAK1	Janus Kinase 1	Protein Coding	P23458	62	GC01M064833	3.12122	https://www.genecards.org/cgi-bin/carddisp.pl?gene=JAK1
CST3	Cystatin C	Protein Coding	P01034	53	GC20M023930	3.11668	https://www.genecards.org/cgi-bin/carddisp.pl?gene=CST3
PPARD	Peroxisome Proliferator Activated Receptor Delta	Protein Coding	Q03181	54	GC06P134964	3.11521	https://www.genecards.org/cgi-bin/carddisp.pl?gene=PPARD
RUNX3	RUNX Family Transcription Factor 3	Protein Coding	Q13761	52	GC01M024899	3.11101	https://www.genecards.org/cgi-bin/carddisp.pl?gene=RUNX3
RAD50	RAD50 Double Strand Break Repair Protein	Protein Coding	Q92878	58	GC05P132556	3.10898	https://www.genecards.org/cgi-bin/carddisp.pl?gene=RAD50
TYMP	Thymidine Phosphorylase	Protein Coding	P19971	56	GC22M050525	3.10898	https://www.genecards.org/cgi-bin/carddisp.pl?gene=TYMP
NUP153	Nucleoporin 153	Protein Coding	P49790	48	GC06M017615	3.10898	https://www.genecards.org/cgi-bin/carddisp.pl?gene=NUP153
DUX4	Double Homeobox 4	Protein Coding	Q9UBX2	36	GC04P190173	3.09034	https://www.genecards.org/cgi-bin/carddisp.pl?gene=DUX4
UBQLN1	Ubiquilin 1	Protein Coding	Q9UMX0	52	GC09M083659	3.08403	https://www.genecards.org/cgi-bin/carddisp.pl?gene=UBQLN1
MEAK7	MTOR Associated Protein, Eak-7 Homolog	Protein Coding	Q6P9B6	40	GC16M084476	3.08368	https://www.genecards.org/cgi-bin/carddisp.pl?gene=MEAK7
PMAIP1	Phorbol-12-Myristate-13-Acetate-Induced Protein 1	Protein Coding	Q13794	48	GC18P059899	3.08125	https://www.genecards.org/cgi-bin/carddisp.pl?gene=PMAIP1
NR4A1	Nuclear Receptor Subfamily 4 Group A Member 1	Protein Coding	P22736	55	GC12P052022	3.08107	https://www.genecards.org/cgi-bin/carddisp.pl?gene=NR4A1
TOP1	DNA Topoisomerase I	Protein Coding	P11387	57	GC20P041028	3.07988	https://www.genecards.org/cgi-bin/carddisp.pl?gene=TOP1
MEF2A	Myocyte Enhancer Factor 2A	Protein Coding	Q02078	54	GC15P099565	3.07922	https://www.genecards.org/cgi-bin/carddisp.pl?gene=MEF2A
LAMP2	Lysosomal Associated Membrane Protein 2	Protein Coding	P13473	54	GC0XM120426	3.0781	https://www.genecards.org/cgi-bin/carddisp.pl?gene=LAMP2
H4C16	H4 Histone 16	Protein Coding	P62805	39	GC12M029833	3.07464	https://www.genecards.org/cgi-bin/carddisp.pl?gene=H4C16
HRAS	HRas Proto-Oncogene, GTPase	Protein Coding	P01112	61	GC11M011817	3.0725	https://www.genecards.org/cgi-bin/carddisp.pl?gene=HRAS
SLC9A1	Solute Carrier Family 9 Member A1	Protein Coding	P19634	58	GC01M031098	3.0725	https://www.genecards.org/cgi-bin/carddisp.pl?gene=SLC9A1
NEIL3	Nei Like DNA Glycosylase 3	Protein Coding	Q8TAT5	46	GC04P177309	3.06769	https://www.genecards.org/cgi-bin/carddisp.pl?gene=NEIL3
MAP3K7	Mitogen-Activated Protein Kinase Kinase Kinase 7	Protein Coding	O43318	59	GC06M090513	3.06351	https://www.genecards.org/cgi-bin/carddisp.pl?gene=MAP3K7
RUNX2	RUNX Family Transcription Factor 2	Protein Coding	Q13950	55	GC06P135072	3.05793	https://www.genecards.org/cgi-bin/carddisp.pl?gene=RUNX2
CD163	CD163 Molecule	Protein Coding	Q86VB7	53	GC12M029352	3.05788	https://www.genecards.org/cgi-bin/carddisp.pl?gene=CD163
POU2F1	POU Class 2 Homeobox 1	Protein Coding	P14859	50	GC01P167229	3.0493	https://www.genecards.org/cgi-bin/carddisp.pl?gene=POU2F1
LDLR	Low Density Lipoprotein Receptor	Protein Coding	P01130	60	GC19P112317	3.04709	https://www.genecards.org/cgi-bin/carddisp.pl?gene=LDLR
NOTCH3	Notch Receptor 3	Protein Coding	Q9UM47	60	GC19M015159	3.04709	https://www.genecards.org/cgi-bin/carddisp.pl?gene=NOTCH3
PGR	Progesterone Receptor	Protein Coding	P06401	59	GC11M126145	3.04709	https://www.genecards.org/cgi-bin/carddisp.pl?gene=PGR
SLC25A5	Solute Carrier Family 25 Member 5	Protein Coding	P05141	52	GC0XP119468	3.04709	https://www.genecards.org/cgi-bin/carddisp.pl?gene=SLC25A5
COQ9	Coenzyme Q9	Protein Coding	O75208	50	GC16P057447	3.04566	https://www.genecards.org/cgi-bin/carddisp.pl?gene=COQ9
PTPN11	Protein Tyrosine Phosphatase Non-Receptor Type 11	Protein Coding	Q06124	62	GC12P112418	3.03777	https://www.genecards.org/cgi-bin/carddisp.pl?gene=PTPN11
S100A8	S100 Calcium Binding Protein A8	Protein Coding	P05109	51	GC01M160881	3.03777	https://www.genecards.org/cgi-bin/carddisp.pl?gene=S100A8
NME2	NME/NM23 Nucleoside Diphosphate Kinase 2	Protein Coding	P22392	53	GC17P051165	3.03734	https://www.genecards.org/cgi-bin/carddisp.pl?gene=NME2
CALCA	Calcitonin Related Polypeptide Alpha	Protein Coding	P06881	52	GC11M014966	3.03596	https://www.genecards.org/cgi-bin/carddisp.pl?gene=CALCA
AGAP3	ArfGAP With GTPase Domain, Ankyrin Repeat And PH Domain 3	Protein Coding	Q96P47	39	GC07P151085	3.03425	https://www.genecards.org/cgi-bin/carddisp.pl?gene=AGAP3
PGAM5	PGAM Family Member 5, Mitochondrial Serine/Threonine Protein Phosphatase	Protein Coding	Q96HS1	39	GC12P132710	3.03156	https://www.genecards.org/cgi-bin/carddisp.pl?gene=PGAM5
NME1	NME/NM23 Nucleoside Diphosphate Kinase 1	Protein Coding	P15531	54	GC17P112649	3.02814	https://www.genecards.org/cgi-bin/carddisp.pl?gene=NME1
MEFV	MEFV Innate Immunity Regulator, Pyrin	Protein Coding	O15553	53	GC16M020459	3.02814	https://www.genecards.org/cgi-bin/carddisp.pl?gene=MEFV
TRPM7	Transient Receptor Potential Cation Channel Subfamily M Member 7	Protein Coding	Q96QT4	51	GC15M050552	3.02814	https://www.genecards.org/cgi-bin/carddisp.pl?gene=TRPM7
NFIC	Nuclear Factor I C	Protein Coding	P08651	48	GC19P003314	3.02555	https://www.genecards.org/cgi-bin/carddisp.pl?gene=NFIC
GLUD1	Glutamate Dehydrogenase 1	Protein Coding	P00367	59	GC10M087050	3.02437	https://www.genecards.org/cgi-bin/carddisp.pl?gene=GLUD1
EGLN2	Egl-9 Family Hypoxia Inducible Factor 2	Protein Coding	Q96KS0	53	GC19P113092	3.0171	https://www.genecards.org/cgi-bin/carddisp.pl?gene=EGLN2
MAVS	Mitochondrial Antiviral Signaling Protein	Protein Coding	Q7Z434	48	GC20P008170	3.0081	https://www.genecards.org/cgi-bin/carddisp.pl?gene=MAVS
ALDH3A1	Aldehyde Dehydrogenase 3 Family Member A1	Protein Coding	P30838	54	GC17M019737	3.00649	https://www.genecards.org/cgi-bin/carddisp.pl?gene=ALDH3A1
IL1RN	Interleukin 1 Receptor Antagonist	Protein Coding	P18510	59	GC02P143688	3.00488	https://www.genecards.org/cgi-bin/carddisp.pl?gene=IL1RN
CDK1	Cyclin Dependent Kinase 1	Protein Coding	P06493	56	GC10P060772	3.00144	https://www.genecards.org/cgi-bin/carddisp.pl?gene=CDK1
PXN	Paxillin	Protein Coding	P49023	53	GC12M120210	3.00144	https://www.genecards.org/cgi-bin/carddisp.pl?gene=PXN
PDCD4	Programmed Cell Death 4	Protein Coding	Q53EL6	52	GC10P110871	3.00084	https://www.genecards.org/cgi-bin/carddisp.pl?gene=PDCD4
APOA5	Apolipoprotein A5	Protein Coding	Q6Q788	52	GC11M116789	2.99664	https://www.genecards.org/cgi-bin/carddisp.pl?gene=APOA5
DKK1	Dickkopf WNT Signaling Pathway Inhibitor 1	Protein Coding	O94907	53	GC10P052314	2.99192	https://www.genecards.org/cgi-bin/carddisp.pl?gene=DKK1
CNR1	Cannabinoid Receptor 1	Protein Coding	P21554	55	GC06M088139	2.99174	https://www.genecards.org/cgi-bin/carddisp.pl?gene=CNR1
EIF2AK4	Eukaryotic Translation Initiation Factor 2 Alpha Kinase 4	Protein Coding	Q9P2K8	53	GC15P039934	2.99174	https://www.genecards.org/cgi-bin/carddisp.pl?gene=EIF2AK4
MT-CO3	Mitochondrially Encoded Cytochrome C Oxidase III	Protein Coding	P00414	39	GCMTP009209	2.98971	https://www.genecards.org/cgi-bin/carddisp.pl?gene=MT-CO3
PYROXD1	Pyridine Nucleotide-Disulphide Oxidoreductase Domain 1	Protein Coding	Q8WU10	46	GC12P021437	2.98288	https://www.genecards.org/cgi-bin/carddisp.pl?gene=PYROXD1
ALOX15	Arachidonate 15-Lipoxygenase	Protein Coding	P16050	54	GC17M004630	2.97802	https://www.genecards.org/cgi-bin/carddisp.pl?gene=ALOX15
SOAT1	Sterol O-Acyltransferase 1	Protein Coding	P35610	53	GC01P179294	2.97637	https://www.genecards.org/cgi-bin/carddisp.pl?gene=SOAT1
SUMO2	Small Ubiquitin Like Modifier 2	Protein Coding	P61956	44	GC17M075165	2.97338	https://www.genecards.org/cgi-bin/carddisp.pl?gene=SUMO2
KRT18	Keratin 18	Protein Coding	P05783	58	GC12P052948	2.97164	https://www.genecards.org/cgi-bin/carddisp.pl?gene=KRT18
YAP1	Yes1 Associated Transcriptional Regulator	Protein Coding	P46937	56	GC11P102110	2.97164	https://www.genecards.org/cgi-bin/carddisp.pl?gene=YAP1
CRYAA	Crystallin Alpha A	Protein Coding	P02489	53	GC21P043169	2.97164	https://www.genecards.org/cgi-bin/carddisp.pl?gene=CRYAA
PNKP	Polynucleotide Kinase 3'-Phosphatase	Protein Coding	Q96T60	55	GC19M093101	2.96709	https://www.genecards.org/cgi-bin/carddisp.pl?gene=PNKP
IGF2	Insulin Like Growth Factor 2	Protein Coding	P01344	58	GC11M011904	2.95937	https://www.genecards.org/cgi-bin/carddisp.pl?gene=IGF2
NCL	Nucleolin	Protein Coding	P19338	53	GC02M231453	2.95937	https://www.genecards.org/cgi-bin/carddisp.pl?gene=NCL
MAFG	MAF BZIP Transcription Factor G	Protein Coding	O15525	46	GC17M081918	2.95937	https://www.genecards.org/cgi-bin/carddisp.pl?gene=MAFG
OPTN	Optineurin	Protein Coding	Q96CV9	53	GC10P013099	2.95113	https://www.genecards.org/cgi-bin/carddisp.pl?gene=OPTN
XPO1	Exportin 1	Protein Coding	O14980	56	GC02M061445	2.95097	https://www.genecards.org/cgi-bin/carddisp.pl?gene=XPO1
TRPC3	Transient Receptor Potential Cation Channel Subfamily C Member 3	Protein Coding	Q13507	55	GC04M121879	2.95087	https://www.genecards.org/cgi-bin/carddisp.pl?gene=TRPC3
BSG	Basigin (Ok Blood Group)	Protein Coding	P35613	53	GC19P000571	2.95087	https://www.genecards.org/cgi-bin/carddisp.pl?gene=BSG
AKT2	AKT Serine/Threonine Kinase 2	Protein Coding	P31751	62	GC19M040230	2.94797	https://www.genecards.org/cgi-bin/carddisp.pl?gene=AKT2
OCLN	Occludin	Protein Coding	Q16625	52	GC05P069492	2.94028	https://www.genecards.org/cgi-bin/carddisp.pl?gene=OCLN
TTK	TTK Protein Kinase	Protein Coding	P33981	55	GC06P080003	2.93891	https://www.genecards.org/cgi-bin/carddisp.pl?gene=TTK
DCT	Dopachrome Tautomerase	Protein Coding	P40126	53	GC13M094436	2.93891	https://www.genecards.org/cgi-bin/carddisp.pl?gene=DCT
ATG7	Autophagy Related 7	Protein Coding	O95352	52	GC03P021552	2.93891	https://www.genecards.org/cgi-bin/carddisp.pl?gene=ATG7
EEF1D	Eukaryotic Translation Elongation Factor 1 Delta	Protein Coding	P29692	46	GC08M143579	2.93844	https://www.genecards.org/cgi-bin/carddisp.pl?gene=EEF1D
PXDN	Peroxidasin	Protein Coding	Q92626	53	GC02M001635	2.93645	https://www.genecards.org/cgi-bin/carddisp.pl?gene=PXDN
BMAL1	Basic Helix-Loop-Helix ARNT Like 1	Protein Coding	O00327	51	GC11P013277	2.9355	https://www.genecards.org/cgi-bin/carddisp.pl?gene=BMAL1
CASP4	Caspase 4	Protein Coding	P49662	54	GC11M104942	2.93083	https://www.genecards.org/cgi-bin/carddisp.pl?gene=CASP4
TKT	Transketolase	Protein Coding	P29401	55	GC03M053224	2.92968	https://www.genecards.org/cgi-bin/carddisp.pl?gene=TKT
SMPD2	Sphingomyelin Phosphodiesterase 2	Protein Coding	O60906	47	GC06P109440	2.9276	https://www.genecards.org/cgi-bin/carddisp.pl?gene=SMPD2
LMNB1	Lamin B1	Protein Coding	P20700	55	GC05P126776	2.92418	https://www.genecards.org/cgi-bin/carddisp.pl?gene=LMNB1
FADS1	Fatty Acid Desaturase 1	Protein Coding	O60427	51	GC11M061799	2.92418	https://www.genecards.org/cgi-bin/carddisp.pl?gene=FADS1
VCP	Valosin Containing Protein	Protein Coding	P55072	58	GC09M035085	2.91703	https://www.genecards.org/cgi-bin/carddisp.pl?gene=VCP
CDC25C	Cell Division Cycle 25C	Protein Coding	P30307	56	GC05M138285	2.91537	https://www.genecards.org/cgi-bin/carddisp.pl?gene=CDC25C
BAG3	BAG Cochaperone 3	Protein Coding	O95817	52	GC10P119651	2.91537	https://www.genecards.org/cgi-bin/carddisp.pl?gene=BAG3
KMT5A	Lysine Methyltransferase 5A	Protein Coding	Q9NQR1	50	GC12P133300	2.91259	https://www.genecards.org/cgi-bin/carddisp.pl?gene=KMT5A
SFTPD	Surfactant Protein D	Protein Coding	P35247	53	GC10M079937	2.91212	https://www.genecards.org/cgi-bin/carddisp.pl?gene=SFTPD
TFPT	TCF3 Fusion Partner	Protein Coding	P0C1Z6	43	GC19M054107	2.91212	https://www.genecards.org/cgi-bin/carddisp.pl?gene=TFPT
ANXA1	Annexin A1	Protein Coding	P04083	55	GC09P073151	2.90787	https://www.genecards.org/cgi-bin/carddisp.pl?gene=ANXA1
PAGE4	PAGE Family Member 4	Protein Coding	O60829	40	GC0XP049829	2.90787	https://www.genecards.org/cgi-bin/carddisp.pl?gene=PAGE4
B2M	Beta-2-Microglobulin	Protein Coding	P61769	59	GC15P044711	2.90771	https://www.genecards.org/cgi-bin/carddisp.pl?gene=B2M
FXYD1	FXYD Domain Containing Ion Transport Regulator 1	Protein Coding	O00168	45	GC19P112926	2.89897	https://www.genecards.org/cgi-bin/carddisp.pl?gene=FXYD1
DDAH2	DDAH Family Member 2, ADMA-Independent	Protein Coding	O95865	49	GC06M031727	2.89722	https://www.genecards.org/cgi-bin/carddisp.pl?gene=DDAH2
UBE3A	Ubiquitin Protein Ligase E3A	Protein Coding	Q05086	57	GC15M025333	2.89611	https://www.genecards.org/cgi-bin/carddisp.pl?gene=UBE3A
CRAT	Carnitine O-Acetyltransferase	Protein Coding	P43155	53	GC09M129094	2.89611	https://www.genecards.org/cgi-bin/carddisp.pl?gene=CRAT
ANKRD2	Ankyrin Repeat Domain 2	Protein Coding	Q9GZV1	45	GC10P097572	2.89321	https://www.genecards.org/cgi-bin/carddisp.pl?gene=ANKRD2
CYP20A1	Cytochrome P450 Family 20 Subfamily A Member 1	Protein Coding	Q6UW02	45	GC02P203238	2.89091	https://www.genecards.org/cgi-bin/carddisp.pl?gene=CYP20A1
ETS2	ETS Proto-Oncogene 2, Transcription Factor	Protein Coding	P15036	50	GC21P038805	2.88658	https://www.genecards.org/cgi-bin/carddisp.pl?gene=ETS2
S100A2	S100 Calcium Binding Protein A2	Protein Coding	P29034	50	GC01M153561	2.88658	https://www.genecards.org/cgi-bin/carddisp.pl?gene=S100A2
ACTB	Actin Beta	Protein Coding	P60709	58	GC07M005527	2.885	https://www.genecards.org/cgi-bin/carddisp.pl?gene=ACTB
HNF4A	Hepatocyte Nuclear Factor 4 Alpha	Protein Coding	P41235	58	GC20P044355	2.885	https://www.genecards.org/cgi-bin/carddisp.pl?gene=HNF4A
CRH	Corticotropin Releasing Hormone	Protein Coding	P06850	52	GC08M066176	2.88499	https://www.genecards.org/cgi-bin/carddisp.pl?gene=CRH
LOX	Lysyl Oxidase	Protein Coding	P28300	56	GC05M122063	2.88248	https://www.genecards.org/cgi-bin/carddisp.pl?gene=LOX
DDX1	DEAD-Box Helicase 1	Protein Coding	Q92499	53	GC02P015591	2.88211	https://www.genecards.org/cgi-bin/carddisp.pl?gene=DDX1
PTAFR	Platelet Activating Factor Receptor	Protein Coding	P25105	51	GC01M028147	2.87991	https://www.genecards.org/cgi-bin/carddisp.pl?gene=PTAFR
SLC22A4	Solute Carrier Family 22 Member 4	Protein Coding	Q9H015	53	GC05P132294	2.87718	https://www.genecards.org/cgi-bin/carddisp.pl?gene=SLC22A4
UBIAD1	UbiA Prenyltransferase Domain Containing 1	Protein Coding	Q9Y5Z9	50	GC01P011273	2.87718	https://www.genecards.org/cgi-bin/carddisp.pl?gene=UBIAD1
GET3	Guided Entry Of Tail-Anchored Proteins Factor 3, ATPase	Protein Coding	O43681	47	GC19P012737	2.86703	https://www.genecards.org/cgi-bin/carddisp.pl?gene=GET3
RECQL4	RecQ Like Helicase 4	Protein Coding	O94761	50	GC08M146626	2.86644	https://www.genecards.org/cgi-bin/carddisp.pl?gene=RECQL4
PTPN2	Protein Tyrosine Phosphatase Non-Receptor Type 2	Protein Coding	P17706	55	GC18M033992	2.86541	https://www.genecards.org/cgi-bin/carddisp.pl?gene=PTPN2
SERPINB5	Serpin Family B Member 5	Protein Coding	P36952	52	GC18P063476	2.86541	https://www.genecards.org/cgi-bin/carddisp.pl?gene=SERPINB5
WWP2	WW Domain Containing E3 Ubiquitin Protein Ligase 2	Protein Coding	O00308	51	GC16P083015	2.86541	https://www.genecards.org/cgi-bin/carddisp.pl?gene=WWP2
GJB2	Gap Junction Protein Beta 2	Protein Coding	P29033	54	GC13M020187	2.86465	https://www.genecards.org/cgi-bin/carddisp.pl?gene=GJB2
TSC2	TSC Complex Subunit 2	Protein Coding	P49815	60	GC16P080239	2.85969	https://www.genecards.org/cgi-bin/carddisp.pl?gene=TSC2
SPARC	Secreted Protein Acidic And Cysteine Rich	Protein Coding	P09486	58	GC05M151661	2.85862	https://www.genecards.org/cgi-bin/carddisp.pl?gene=SPARC
MSH2	MutS Homolog 2	Protein Coding	P43246	57	GC02P047403	2.85862	https://www.genecards.org/cgi-bin/carddisp.pl?gene=MSH2
PPP1R15A	Protein Phosphatase 1 Regulatory Subunit 15A	Protein Coding	O75807	47	GC19P048872	2.85532	https://www.genecards.org/cgi-bin/carddisp.pl?gene=PPP1R15A
CHCHD2	Coiled-Coil-Helix-Coiled-Coil-Helix Domain Containing 2	Protein Coding	Q9Y6H1	48	GC07M056101	2.85202	https://www.genecards.org/cgi-bin/carddisp.pl?gene=CHCHD2
ABCB1	ATP Binding Cassette Subfamily B Member 1	Protein Coding	P08183	60	GC07M087504	2.8425	https://www.genecards.org/cgi-bin/carddisp.pl?gene=ABCB1
BCL6	BCL6 Transcription Repressor	Protein Coding	P41182	54	GC03M187721	2.8419	https://www.genecards.org/cgi-bin/carddisp.pl?gene=BCL6
CLTC	Clathrin Heavy Chain	Protein Coding	Q00610	52	GC17P059619	2.8419	https://www.genecards.org/cgi-bin/carddisp.pl?gene=CLTC
DUSP6	Dual Specificity Phosphatase 6	Protein Coding	Q16828	55	GC12M089347	2.84127	https://www.genecards.org/cgi-bin/carddisp.pl?gene=DUSP6
ITPKB	Inositol-Trisphosphate 3-Kinase B	Protein Coding	P27987	49	GC01M226631	2.84115	https://www.genecards.org/cgi-bin/carddisp.pl?gene=ITPKB
VDAC1	Voltage Dependent Anion Channel 1	Protein Coding	P21796	54	GC05M133975	2.83959	https://www.genecards.org/cgi-bin/carddisp.pl?gene=VDAC1
EDNRB	Endothelin Receptor Type B	Protein Coding	P24530	59	GC13M077895	2.83871	https://www.genecards.org/cgi-bin/carddisp.pl?gene=EDNRB
FGF1	Fibroblast Growth Factor 1	Protein Coding	P05230	56	GC05M142555	2.83871	https://www.genecards.org/cgi-bin/carddisp.pl?gene=FGF1
AAAS	Aladin WD Repeat Nucleoporin	Protein Coding	Q9NRG9	49	GC12M053307	2.83871	https://www.genecards.org/cgi-bin/carddisp.pl?gene=AAAS
ALDOA	Aldolase, Fructose-Bisphosphate A	Protein Coding	P04075	58	GC16P030064	2.837	https://www.genecards.org/cgi-bin/carddisp.pl?gene=ALDOA
MAP3K6	Mitogen-Activated Protein Kinase Kinase Kinase 6	Protein Coding	O95382	47	GC01M031106	2.837	https://www.genecards.org/cgi-bin/carddisp.pl?gene=MAP3K6
BCS1L	BCS1 Homolog, Ubiquinol-Cytochrome C Reductase Complex Chaperone	Protein Coding	Q9Y276	54	GC02P218658	2.83516	https://www.genecards.org/cgi-bin/carddisp.pl?gene=BCS1L
ACAD9	Acyl-CoA Dehydrogenase Family Member 9	Protein Coding	Q9H845	52	GC03P139001	2.83516	https://www.genecards.org/cgi-bin/carddisp.pl?gene=ACAD9
KPNA2	Karyopherin Subunit Alpha 2	Protein Coding	P52292	53	GC17P068035	2.82674	https://www.genecards.org/cgi-bin/carddisp.pl?gene=KPNA2
LCK	LCK Proto-Oncogene, Src Family Tyrosine Kinase	Protein Coding	P06239	60	GC01P032251	2.82332	https://www.genecards.org/cgi-bin/carddisp.pl?gene=LCK
ODC1	Ornithine Decarboxylase 1	Protein Coding	P11926	57	GC02M010432	2.82332	https://www.genecards.org/cgi-bin/carddisp.pl?gene=ODC1
SMPD1	Sphingomyelin Phosphodiesterase 1	Protein Coding	P17405	57	GC11P006390	2.82332	https://www.genecards.org/cgi-bin/carddisp.pl?gene=SMPD1
BLVRB	Biliverdin Reductase B	Protein Coding	P30043	50	GC19M040447	2.82332	https://www.genecards.org/cgi-bin/carddisp.pl?gene=BLVRB
GBA1	Glucosylceramidase Beta 1	Protein Coding	P04062	58	GC01M161111	2.82287	https://www.genecards.org/cgi-bin/carddisp.pl?gene=GBA1
CXCL2	C-X-C Motif Chemokine Ligand 2	Protein Coding	P19875	48	GC04M074097	2.82287	https://www.genecards.org/cgi-bin/carddisp.pl?gene=CXCL2
TLR8	Toll Like Receptor 8	Protein Coding	Q9NR97	58	GC0XP012924	2.81837	https://www.genecards.org/cgi-bin/carddisp.pl?gene=TLR8
ALDH5A1	Aldehyde Dehydrogenase 5 Family Member A1	Protein Coding	P51649	56	GC06P024494	2.81837	https://www.genecards.org/cgi-bin/carddisp.pl?gene=ALDH5A1
TFAP2A	Transcription Factor AP-2 Alpha	Protein Coding	P05549	55	GC06M010393	2.81837	https://www.genecards.org/cgi-bin/carddisp.pl?gene=TFAP2A
TFEB	Transcription Factor EB	Protein Coding	P19484	51	GC06M093992	2.81529	https://www.genecards.org/cgi-bin/carddisp.pl?gene=TFEB
NCF4	Neutrophil Cytosolic Factor 4	Protein Coding	Q15080	55	GC22P036860	2.81395	https://www.genecards.org/cgi-bin/carddisp.pl?gene=NCF4
PDIA2	Protein Disulfide Isomerase Family A Member 2	Protein Coding	Q13087	48	GC16P080156	2.81395	https://www.genecards.org/cgi-bin/carddisp.pl?gene=PDIA2
SAA1	Serum Amyloid A1	Protein Coding	P0DJI8	47	GC11P019139	2.81395	https://www.genecards.org/cgi-bin/carddisp.pl?gene=SAA1
ULK1	Unc-51 Like Autophagy Activating Kinase 1	Protein Coding	O75385	53	GC12P131894	2.8115	https://www.genecards.org/cgi-bin/carddisp.pl?gene=ULK1
IKBKE	Inhibitor Of Nuclear Factor Kappa B Kinase Subunit Epsilon	Protein Coding	Q14164	54	GC01P206470	2.81065	https://www.genecards.org/cgi-bin/carddisp.pl?gene=IKBKE
VIP	Vasoactive Intestinal Peptide	Protein Coding	P01282	53	GC06P152750	2.81065	https://www.genecards.org/cgi-bin/carddisp.pl?gene=VIP
IFI16	Interferon Gamma Inducible Protein 16	Protein Coding	Q16666	52	GC01P158999	2.81065	https://www.genecards.org/cgi-bin/carddisp.pl?gene=IFI16
MCU	Mitochondrial Calcium Uniporter	Protein Coding	Q8NE86	47	GC10P072692	2.81065	https://www.genecards.org/cgi-bin/carddisp.pl?gene=MCU
USP28	Ubiquitin Specific Peptidase 28	Protein Coding	Q96RU2	47	GC11M113797	2.80424	https://www.genecards.org/cgi-bin/carddisp.pl?gene=USP28
LYN	LYN Proto-Oncogene, Src Family Tyrosine Kinase	Protein Coding	P07948	58	GC08P055879	2.7939	https://www.genecards.org/cgi-bin/carddisp.pl?gene=LYN
TLR7	Toll Like Receptor 7	Protein Coding	Q9NYK1	57	GC0XP012867	2.7939	https://www.genecards.org/cgi-bin/carddisp.pl?gene=TLR7
PDSS2	Decaprenyl Diphosphate Synthase Subunit 2	Protein Coding	Q86YH6	50	GC06M107152	2.7939	https://www.genecards.org/cgi-bin/carddisp.pl?gene=PDSS2
NDUFS5	NADH:Ubiquinone Oxidoreductase Subunit S5	Protein Coding	O43920	47	GC01P039026	2.7939	https://www.genecards.org/cgi-bin/carddisp.pl?gene=NDUFS5
TRIM48	Tripartite Motif Containing 48	Protein Coding	Q8IWZ4	34	GC11P055262	2.7937	https://www.genecards.org/cgi-bin/carddisp.pl?gene=TRIM48
PFKFB3	6-Phosphofructo-2-Kinase/Fructose-2,6-Biphosphatase 3	Protein Coding	Q16875	52	GC10P006144	2.79041	https://www.genecards.org/cgi-bin/carddisp.pl?gene=PFKFB3
AATF	Apoptosis Antagonizing Transcription Factor	Protein Coding	Q9NY61	50	GC17P036948	2.79041	https://www.genecards.org/cgi-bin/carddisp.pl?gene=AATF
RANBP2	RAN Binding Protein 2	Protein Coding	P49792	54	GC02P108719	2.78983	https://www.genecards.org/cgi-bin/carddisp.pl?gene=RANBP2
MAP1LC3A	Microtubule Associated Protein 1 Light Chain 3 Alpha	Protein Coding	Q9H492	48	GC20P034546	2.7848	https://www.genecards.org/cgi-bin/carddisp.pl?gene=MAP1LC3A
TLR9	Toll Like Receptor 9	Protein Coding	Q9NR96	54	GC03M053878	2.78136	https://www.genecards.org/cgi-bin/carddisp.pl?gene=TLR9
SNCB	Synuclein Beta	Protein Coding	Q16143	53	GC05M176620	2.78136	https://www.genecards.org/cgi-bin/carddisp.pl?gene=SNCB
CNTF	Ciliary Neurotrophic Factor	Protein Coding	P26441	51	GC11P058622	2.78136	https://www.genecards.org/cgi-bin/carddisp.pl?gene=CNTF
HADHA	Hydroxyacyl-CoA Dehydrogenase Trifunctional Multienzyme Complex Subunit Alpha	Protein Coding	P40939	55	GC02M026190	2.78098	https://www.genecards.org/cgi-bin/carddisp.pl?gene=HADHA
FOXA1	Forkhead Box A1	Protein Coding	P55317	52	GC14M037589	2.78098	https://www.genecards.org/cgi-bin/carddisp.pl?gene=FOXA1
WNK1	WNK Lysine Deficient Protein Kinase 1	Protein Coding	Q9H4A3	56	GC12P000763	2.77614	https://www.genecards.org/cgi-bin/carddisp.pl?gene=WNK1
CYB5A	Cytochrome B5 Type A	Protein Coding	P00167	52	GC18M074250	2.77566	https://www.genecards.org/cgi-bin/carddisp.pl?gene=CYB5A
GLA	Galactosidase Alpha	Protein Coding	P06280	58	GC0XM101393	2.7684	https://www.genecards.org/cgi-bin/carddisp.pl?gene=GLA
NUP98	Nucleoporin 98 And 96 Precursor	Protein Coding	P52948	54	GC11M003671	2.7684	https://www.genecards.org/cgi-bin/carddisp.pl?gene=NUP98
TXNRD3	Thioredoxin Reductase 3	Protein Coding	Q86VQ6	44	GC03M126577	2.7684	https://www.genecards.org/cgi-bin/carddisp.pl?gene=TXNRD3
FURIN	Furin, Paired Basic Amino Acid Cleaving Enzyme	Protein Coding	P09958	56	GC15P090868	2.76595	https://www.genecards.org/cgi-bin/carddisp.pl?gene=FURIN
LCAT	Lecithin-Cholesterol Acyltransferase	Protein Coding	P04180	56	GC16M067939	2.76304	https://www.genecards.org/cgi-bin/carddisp.pl?gene=LCAT
HIPK1	Homeodomain Interacting Protein Kinase 1	Protein Coding	Q86Z02	45	GC01P113929	2.76211	https://www.genecards.org/cgi-bin/carddisp.pl?gene=HIPK1
CD4	CD4 Molecule	Protein Coding	P01730	59	GC12P006786	2.75796	https://www.genecards.org/cgi-bin/carddisp.pl?gene=CD4
RPS6KB1	Ribosomal Protein S6 Kinase B1	Protein Coding	P23443	59	GC17P059893	2.75436	https://www.genecards.org/cgi-bin/carddisp.pl?gene=RPS6KB1
NBR1	NBR1 Autophagy Cargo Receptor	Protein Coding	Q14596	48	GC17P043170	2.75368	https://www.genecards.org/cgi-bin/carddisp.pl?gene=NBR1
TPO	Thyroid Peroxidase	Protein Coding	P07202	56	GC02P001374	2.74958	https://www.genecards.org/cgi-bin/carddisp.pl?gene=TPO
STC2	Stanniocalcin 2	Protein Coding	O76061	44	GC05M173314	2.74958	https://www.genecards.org/cgi-bin/carddisp.pl?gene=STC2
MMACHC	Metabolism Of Cobalamin Associated C	Protein Coding	Q9Y4U1	52	GC01P045500	2.74939	https://www.genecards.org/cgi-bin/carddisp.pl?gene=MMACHC
SUMO3	Small Ubiquitin Like Modifier 3	Protein Coding	P55854	47	GC21M044805	2.74939	https://www.genecards.org/cgi-bin/carddisp.pl?gene=SUMO3
CHRNA4	Cholinergic Receptor Nicotinic Alpha 4 Subunit	Protein Coding	P43681	58	GC20M063343	2.74789	https://www.genecards.org/cgi-bin/carddisp.pl?gene=CHRNA4
RARA	Retinoic Acid Receptor Alpha	Protein Coding	P10276	59	GC17P040309	2.74044	https://www.genecards.org/cgi-bin/carddisp.pl?gene=RARA
ABCC6	ATP Binding Cassette Subfamily C Member 6	Protein Coding	O95255	56	GC16M020960	2.74044	https://www.genecards.org/cgi-bin/carddisp.pl?gene=ABCC6
CAPN2	Calpain 2	Protein Coding	P17655	56	GC01P223701	2.74044	https://www.genecards.org/cgi-bin/carddisp.pl?gene=CAPN2
APTX	Aprataxin	Protein Coding	Q7Z2E3	53	GC09M032886	2.74044	https://www.genecards.org/cgi-bin/carddisp.pl?gene=APTX
GSKIP	GSK3B Interacting Protein	Protein Coding	Q9P0R6	38	GC14P096363	2.73831	https://www.genecards.org/cgi-bin/carddisp.pl?gene=GSKIP
RAC2	Rac Family Small GTPase 2	Protein Coding	P15153	59	GC22M077096	2.73668	https://www.genecards.org/cgi-bin/carddisp.pl?gene=RAC2
CYP2A6	Cytochrome P450 Family 2 Subfamily A Member 6	Protein Coding	P11509	54	GC19M040843	2.73668	https://www.genecards.org/cgi-bin/carddisp.pl?gene=CYP2A6
PECAM1	Platelet And Endothelial Cell Adhesion Molecule 1	Protein Coding	P16284	50	GC17M064319	2.72769	https://www.genecards.org/cgi-bin/carddisp.pl?gene=PECAM1
NARF	Nuclear Prelamin A Recognition Factor	Protein Coding	Q9UHQ1	44	GC17P082458	2.71707	https://www.genecards.org/cgi-bin/carddisp.pl?gene=NARF
ITGB1	Integrin Subunit Beta 1	Protein Coding	P05556	58	GC10M035774	2.71545	https://www.genecards.org/cgi-bin/carddisp.pl?gene=ITGB1
STEAP4	STEAP4 Metalloreductase	Protein Coding	Q687X5	50	GC07M088484	2.71545	https://www.genecards.org/cgi-bin/carddisp.pl?gene=STEAP4
CCL27	C-C Motif Chemokine Ligand 27	Protein Coding	Q9Y4X3	45	GC09M035248	2.71545	https://www.genecards.org/cgi-bin/carddisp.pl?gene=CCL27
NPC1	NPC Intracellular Cholesterol Transporter 1	Protein Coding	O15118	59	GC18M023506	2.71375	https://www.genecards.org/cgi-bin/carddisp.pl?gene=NPC1
MLH1	MutL Homolog 1	Protein Coding	P40692	58	GC03P036993	2.71375	https://www.genecards.org/cgi-bin/carddisp.pl?gene=MLH1
SKP2	S-Phase Kinase Associated Protein 2	Protein Coding	Q13309	54	GC05P036151	2.71375	https://www.genecards.org/cgi-bin/carddisp.pl?gene=SKP2
POLGARF	POLG Alternative Reading Frame	Protein Coding	A0A3B3IS91	17	GC15M151439	2.71375	https://www.genecards.org/cgi-bin/carddisp.pl?gene=POLGARF
PAX6	Paired Box 6	Protein Coding	P26367	57	GC11M031784	2.71364	https://www.genecards.org/cgi-bin/carddisp.pl?gene=PAX6
DIO1	Iodothyronine Deiodinase 1	Protein Coding	P49895	48	GC01P053891	2.71364	https://www.genecards.org/cgi-bin/carddisp.pl?gene=DIO1
EGLN1	Egl-9 Family Hypoxia Inducible Factor 1	Protein Coding	Q9GZT9	58	GC01M231363	2.71314	https://www.genecards.org/cgi-bin/carddisp.pl?gene=EGLN1
ME1	Malic Enzyme 1	Protein Coding	P48163	45	GC06M083210	2.71314	https://www.genecards.org/cgi-bin/carddisp.pl?gene=ME1
APLN	Apelin	Protein Coding	Q9ULZ1	45	GC0XM129645	2.71022	https://www.genecards.org/cgi-bin/carddisp.pl?gene=APLN
WNT1	Wnt Family Member 1	Protein Coding	P04628	56	GC12P060231	2.70876	https://www.genecards.org/cgi-bin/carddisp.pl?gene=WNT1
RNF41	Ring Finger Protein 41	Protein Coding	Q9H4P4	46	GC12M056202	2.70731	https://www.genecards.org/cgi-bin/carddisp.pl?gene=RNF41
C3	Complement C3	Protein Coding	P01024	58	GC19M006677	2.69964	https://www.genecards.org/cgi-bin/carddisp.pl?gene=C3
PLD2	Phospholipase D2	Protein Coding	O14939	54	GC17P111047	2.6959	https://www.genecards.org/cgi-bin/carddisp.pl?gene=PLD2
MAF	MAF BZIP Transcription Factor	Protein Coding	O75444	54	GC16M079204	2.69238	https://www.genecards.org/cgi-bin/carddisp.pl?gene=MAF
PDGFB	Platelet Derived Growth Factor Subunit B	Protein Coding	P01127	60	GC22M077951	2.68868	https://www.genecards.org/cgi-bin/carddisp.pl?gene=PDGFB
PRKCI	Protein Kinase C Iota	Protein Coding	P41743	54	GC03P170222	2.68868	https://www.genecards.org/cgi-bin/carddisp.pl?gene=PRKCI
RDH13	Retinol Dehydrogenase 13	Protein Coding	Q8NBN7	47	GC19M055039	2.68564	https://www.genecards.org/cgi-bin/carddisp.pl?gene=RDH13
RPS6KA1	Ribosomal Protein S6 Kinase A1	Protein Coding	Q15418	59	GC01P041934	2.68397	https://www.genecards.org/cgi-bin/carddisp.pl?gene=RPS6KA1
ATP7A	ATPase Copper Transporting Alpha	Protein Coding	Q04656	55	GC0XP078165	2.68397	https://www.genecards.org/cgi-bin/carddisp.pl?gene=ATP7A
GFPT2	Glutamine-Fructose-6-Phosphate Transaminase 2	Protein Coding	O94808	47	GC05M180300	2.68397	https://www.genecards.org/cgi-bin/carddisp.pl?gene=GFPT2
PGK1	Phosphoglycerate Kinase 1	Protein Coding	P00558	57	GC0XP078166	2.683	https://www.genecards.org/cgi-bin/carddisp.pl?gene=PGK1
TAFAZZIN	Tafazzin, Phospholipid-Lysophospholipid Transacylase	Protein Coding	Q16635	50	GC0XP154725	2.68054	https://www.genecards.org/cgi-bin/carddisp.pl?gene=TAFAZZIN
MT-ND4	Mitochondrially Encoded NADH:Ubiquinone Oxidoreductase Core Subunit 4	Protein Coding	P03905	40	GCMTP010762	2.67415	https://www.genecards.org/cgi-bin/carddisp.pl?gene=MT-ND4
ANXA2	Annexin A2	Protein Coding	P07355	56	GC15M060347	2.66318	https://www.genecards.org/cgi-bin/carddisp.pl?gene=ANXA2
NEDD4	NEDD4 E3 Ubiquitin Protein Ligase	Protein Coding	P46934	55	GC15M055826	2.66318	https://www.genecards.org/cgi-bin/carddisp.pl?gene=NEDD4
CANX	Calnexin	Protein Coding	P27824	54	GC05P179678	2.66318	https://www.genecards.org/cgi-bin/carddisp.pl?gene=CANX
ATXN1	Ataxin 1	Protein Coding	P54253	53	GC06M016299	2.66318	https://www.genecards.org/cgi-bin/carddisp.pl?gene=ATXN1
HNRNPU	Heterogeneous Nuclear Ribonucleoprotein U	Protein Coding	Q00839	51	GC01M244844	2.66318	https://www.genecards.org/cgi-bin/carddisp.pl?gene=HNRNPU
MMP14	Matrix Metallopeptidase 14	Protein Coding	P50281	59	GC14P045941	2.66242	https://www.genecards.org/cgi-bin/carddisp.pl?gene=MMP14
DHRS2	Dehydrogenase/Reductase 2	Protein Coding	Q13268	46	GC14P045952	2.66242	https://www.genecards.org/cgi-bin/carddisp.pl?gene=DHRS2
DDR1	Discoidin Domain Receptor Tyrosine Kinase 1	Protein Coding	Q08345	54	GC06P134802	2.66222	https://www.genecards.org/cgi-bin/carddisp.pl?gene=DDR1
NDUFAF1	NADH:Ubiquinone Oxidoreductase Complex Assembly Factor 1	Protein Coding	Q9Y375	50	GC15M041387	2.66222	https://www.genecards.org/cgi-bin/carddisp.pl?gene=NDUFAF1
SERPINA1	Serpin Family A Member 1	Protein Coding	P01009	58	GC14M094376	2.66103	https://www.genecards.org/cgi-bin/carddisp.pl?gene=SERPINA1
BRCA2	BRCA2 DNA Repair Associated	Protein Coding	P51587	56	GC13P032315	2.66103	https://www.genecards.org/cgi-bin/carddisp.pl?gene=BRCA2
PRXL2A	Peroxiredoxin Like 2A	Protein Coding	Q9BRX8	41	GC10P112439	2.65602	https://www.genecards.org/cgi-bin/carddisp.pl?gene=PRXL2A
NSUN2	NOP2/Sun RNA Methyltransferase 2	Protein Coding	Q08J23	52	GC05M006599	2.65507	https://www.genecards.org/cgi-bin/carddisp.pl?gene=NSUN2
PSMD1	Proteasome 26S Subunit, Non-ATPase 1	Protein Coding	Q99460	50	GC02P231056	2.65238	https://www.genecards.org/cgi-bin/carddisp.pl?gene=PSMD1
HNRNPK	Heterogeneous Nuclear Ribonucleoprotein K	Protein Coding	P61978	54	GC09M109180	2.65122	https://www.genecards.org/cgi-bin/carddisp.pl?gene=HNRNPK
C1QTNF3	C1q And TNF Related 3	Protein Coding	Q9BXJ4	43	GC05M034017	2.65122	https://www.genecards.org/cgi-bin/carddisp.pl?gene=C1QTNF3
PJVK	Pejvakin	Protein Coding	Q0ZLH3	43	GC02P178450	2.65044	https://www.genecards.org/cgi-bin/carddisp.pl?gene=PJVK
CBL	Cbl Proto-Oncogene	Protein Coding	P22681	59	GC11P119206	2.64085	https://www.genecards.org/cgi-bin/carddisp.pl?gene=CBL
RPE	Ribulose-5-Phosphate-3-Epimerase	Protein Coding	Q96AT9	48	GC02P210002	2.6406	https://www.genecards.org/cgi-bin/carddisp.pl?gene=RPE
TCN2	Transcobalamin 2	Protein Coding	P20062	52	GC22P070335	2.63771	https://www.genecards.org/cgi-bin/carddisp.pl?gene=TCN2
SHOX	SHOX Homeobox	Protein Coding	O15266	47	GC0XP000624	2.63771	https://www.genecards.org/cgi-bin/carddisp.pl?gene=SHOX
MET	MET Proto-Oncogene, Receptor Tyrosine Kinase	Protein Coding	P08581	63	GC07P116672	2.63649	https://www.genecards.org/cgi-bin/carddisp.pl?gene=MET
FTO	FTO Alpha-Ketoglutarate Dependent Dioxygenase	Protein Coding	Q9C0B1	55	GC16P082352	2.63649	https://www.genecards.org/cgi-bin/carddisp.pl?gene=FTO
MCM3	Minichromosome Maintenance Complex Component 3	Protein Coding	P25205	54	GC06M052264	2.63649	https://www.genecards.org/cgi-bin/carddisp.pl?gene=MCM3
ADM2	Adrenomedullin 2	Protein Coding	Q7Z4H4	42	GC22P050481	2.63649	https://www.genecards.org/cgi-bin/carddisp.pl?gene=ADM2
LRP2	LDL Receptor Related Protein 2	Protein Coding	P98164	58	GC02M169127	2.62768	https://www.genecards.org/cgi-bin/carddisp.pl?gene=LRP2
FXR1	FMR1 Autosomal Homolog 1	Protein Coding	P51114	53	GC03P180868	2.62768	https://www.genecards.org/cgi-bin/carddisp.pl?gene=FXR1
TNFSF12	TNF Superfamily Member 12	Protein Coding	O43508	46	GC17P111184	2.62768	https://www.genecards.org/cgi-bin/carddisp.pl?gene=TNFSF12
CTCF	CCCTC-Binding Factor	Protein Coding	P49711	56	GC16P082860	2.62442	https://www.genecards.org/cgi-bin/carddisp.pl?gene=CTCF
FIS1	Fission, Mitochondrial 1	Protein Coding	Q9Y3D6	48	GC07M101239	2.62442	https://www.genecards.org/cgi-bin/carddisp.pl?gene=FIS1
HBA2	Hemoglobin Subunit Alpha 2	Protein Coding	P69905	50	GC16P080150	2.62088	https://www.genecards.org/cgi-bin/carddisp.pl?gene=HBA2
VDAC2	Voltage Dependent Anion Channel 2	Protein Coding	P45880	53	GC10P075210	2.62018	https://www.genecards.org/cgi-bin/carddisp.pl?gene=VDAC2
TNFRSF12A	TNF Receptor Superfamily Member 12A	Protein Coding	Q9NP84	51	GC16P003018	2.62018	https://www.genecards.org/cgi-bin/carddisp.pl?gene=TNFRSF12A
VCL	Vinculin	Protein Coding	P18206	56	GC10P073995	2.61844	https://www.genecards.org/cgi-bin/carddisp.pl?gene=VCL
YBX1	Y-Box Binding Protein 1	Protein Coding	P67809	49	GC01P042682	2.61682	https://www.genecards.org/cgi-bin/carddisp.pl?gene=YBX1
PLK1	Polo Like Kinase 1	Protein Coding	P53350	60	GC16P081177	2.60842	https://www.genecards.org/cgi-bin/carddisp.pl?gene=PLK1
DLST	Dihydrolipoamide S-Succinyltransferase	Protein Coding	P36957	55	GC14P074881	2.60842	https://www.genecards.org/cgi-bin/carddisp.pl?gene=DLST
EWSR1	EWS RNA Binding Protein 1	Protein Coding	Q01844	54	GC22P070291	2.60842	https://www.genecards.org/cgi-bin/carddisp.pl?gene=EWSR1
NEFH	Neurofilament Heavy Chain	Protein Coding	P12036	54	GC22P029480	2.60322	https://www.genecards.org/cgi-bin/carddisp.pl?gene=NEFH
CPEB2	Cytoplasmic Polyadenylation Element Binding Protein 2	Protein Coding	Q7Z5Q1	41	GC04P024653	2.59962	https://www.genecards.org/cgi-bin/carddisp.pl?gene=CPEB2
MT-ND3	Mitochondrially Encoded NADH:Ubiquinone Oxidoreductase Core Subunit 3	Protein Coding	P03897	41	GCMTP010061	2.59533	https://www.genecards.org/cgi-bin/carddisp.pl?gene=MT-ND3
KLF10	KLF Transcription Factor 10	Protein Coding	Q13118	48	GC08M102648	2.59137	https://www.genecards.org/cgi-bin/carddisp.pl?gene=KLF10
CTSL	Cathepsin L	Protein Coding	P07711	56	GC09P087725	2.59048	https://www.genecards.org/cgi-bin/carddisp.pl?gene=CTSL
TNFRSF11B	TNF Receptor Superfamily Member 11b	Protein Coding	O00300	56	GC08M118923	2.58445	https://www.genecards.org/cgi-bin/carddisp.pl?gene=TNFRSF11B
WARS1	Tryptophanyl-TRNA Synthetase 1	Protein Coding	P23381	54	GC14M119835	2.58153	https://www.genecards.org/cgi-bin/carddisp.pl?gene=WARS1
SLC18A2	Solute Carrier Family 18 Member A2	Protein Coding	Q05940	56	GC10P117241	2.57771	https://www.genecards.org/cgi-bin/carddisp.pl?gene=SLC18A2
CLIC1	Chloride Intracellular Channel 1	Protein Coding	O00299	51	GC06M093794	2.57771	https://www.genecards.org/cgi-bin/carddisp.pl?gene=CLIC1
OGT	O-Linked N-Acetylglucosamine (GlcNAc) Transferase	Protein Coding	O15294	55	GC0XP071735	2.57692	https://www.genecards.org/cgi-bin/carddisp.pl?gene=OGT
AMPD3	Adenosine Monophosphate Deaminase 3	Protein Coding	Q01432	51	GC11P011178	2.57692	https://www.genecards.org/cgi-bin/carddisp.pl?gene=AMPD3
NR1H3	Nuclear Receptor Subfamily 1 Group H Member 3	Protein Coding	Q13133	55	GC11P047248	2.57604	https://www.genecards.org/cgi-bin/carddisp.pl?gene=NR1H3
ABCB8	ATP Binding Cassette Subfamily B Member 8	Protein Coding	Q9NUT2	47	GC07P151028	2.57432	https://www.genecards.org/cgi-bin/carddisp.pl?gene=ABCB8
TP73	Tumor Protein P73	Protein Coding	O15350	53	GC01P003652	2.56961	https://www.genecards.org/cgi-bin/carddisp.pl?gene=TP73
RBP4	Retinol Binding Protein 4	Protein Coding	P02753	54	GC10M093591	2.56535	https://www.genecards.org/cgi-bin/carddisp.pl?gene=RBP4
VNN2	Vanin 2	Protein Coding	O95498	48	GC06M132743	2.56157	https://www.genecards.org/cgi-bin/carddisp.pl?gene=VNN2
PENK	Proenkephalin	Protein Coding	P01210	46	GC08M056436	2.5588	https://www.genecards.org/cgi-bin/carddisp.pl?gene=PENK
KLK1	Kallikrein 1	Protein Coding	P06870	55	GC19M050819	2.55421	https://www.genecards.org/cgi-bin/carddisp.pl?gene=KLK1
TRIM32	Tripartite Motif Containing 32	Protein Coding	Q13049	52	GC09P116687	2.55421	https://www.genecards.org/cgi-bin/carddisp.pl?gene=TRIM32
QDPR	Quinoid Dihydropteridine Reductase	Protein Coding	P09417	54	GC04M017460	2.55357	https://www.genecards.org/cgi-bin/carddisp.pl?gene=QDPR
SERPINI1	Serpin Family I Member 1	Protein Coding	Q99574	55	GC03P167735	2.55102	https://www.genecards.org/cgi-bin/carddisp.pl?gene=SERPINI1
C1QBP	Complement C1q Binding Protein	Protein Coding	Q07021	53	GC17M005432	2.55102	https://www.genecards.org/cgi-bin/carddisp.pl?gene=C1QBP
DAO	D-Amino Acid Oxidase	Protein Coding	P14920	53	GC12P108865	2.55102	https://www.genecards.org/cgi-bin/carddisp.pl?gene=DAO
RPE65	Retinoid Isomerohydrolase RPE65	Protein Coding	Q16518	53	GC01M068428	2.55102	https://www.genecards.org/cgi-bin/carddisp.pl?gene=RPE65
SULT1A3	Sulfotransferase Family 1A Member 3	Protein Coding	P0DMM9	45	GC16P030199	2.55102	https://www.genecards.org/cgi-bin/carddisp.pl?gene=SULT1A3
FANCA	FA Complementation Group A	Protein Coding	O15360	59	GC16M090078	2.54716	https://www.genecards.org/cgi-bin/carddisp.pl?gene=FANCA
ECE1	Endothelin Converting Enzyme 1	Protein Coding	P42892	58	GC01M021217	2.54716	https://www.genecards.org/cgi-bin/carddisp.pl?gene=ECE1
MLXIPL	MLX Interacting Protein Like	Protein Coding	Q9NP71	52	GC07M073593	2.54716	https://www.genecards.org/cgi-bin/carddisp.pl?gene=MLXIPL
SPG7	SPG7 Matrix AAA Peptidase Subunit, Paraplegin	Protein Coding	Q9UQ90	52	GC16P095411	2.54071	https://www.genecards.org/cgi-bin/carddisp.pl?gene=SPG7
TRIM33	Tripartite Motif Containing 33	Protein Coding	Q9UPN9	51	GC01M114392	2.54071	https://www.genecards.org/cgi-bin/carddisp.pl?gene=TRIM33
PTGIS	Prostaglandin I2 Synthase	Protein Coding	Q16647	53	GC20M049503	2.53813	https://www.genecards.org/cgi-bin/carddisp.pl?gene=PTGIS
MT-CYB	Mitochondrially Encoded Cytochrome B	Protein Coding	P00156	40	GCMTP014749	2.53813	https://www.genecards.org/cgi-bin/carddisp.pl?gene=MT-CYB
CXCR4	C-X-C Motif Chemokine Receptor 4	Protein Coding	P61073	61	GC02M136114	2.53278	https://www.genecards.org/cgi-bin/carddisp.pl?gene=CXCR4
CDH2	Cadherin 2	Protein Coding	P19022	60	GC18M034101	2.53067	https://www.genecards.org/cgi-bin/carddisp.pl?gene=CDH2
LDHA	Lactate Dehydrogenase A	Protein Coding	P00338	59	GC11P018394	2.53067	https://www.genecards.org/cgi-bin/carddisp.pl?gene=LDHA
TOP2A	DNA Topoisomerase II Alpha	Protein Coding	P11388	59	GC17M040388	2.53067	https://www.genecards.org/cgi-bin/carddisp.pl?gene=TOP2A
SLC12A1	Solute Carrier Family 12 Member 1	Protein Coding	Q13621	56	GC15P157296	2.53067	https://www.genecards.org/cgi-bin/carddisp.pl?gene=SLC12A1
CSK	C-Terminal Src Kinase	Protein Coding	P41240	55	GC15P074782	2.53067	https://www.genecards.org/cgi-bin/carddisp.pl?gene=CSK
TUBA1B	Tubulin Alpha 1b	Protein Coding	P68363	53	GC12M049127	2.53067	https://www.genecards.org/cgi-bin/carddisp.pl?gene=TUBA1B
DPP3	Dipeptidyl Peptidase 3	Protein Coding	Q9NY33	48	GC11P089184	2.53067	https://www.genecards.org/cgi-bin/carddisp.pl?gene=DPP3
SEMA4A	Semaphorin 4A	Protein Coding	Q9H3S1	51	GC01P156147	2.52888	https://www.genecards.org/cgi-bin/carddisp.pl?gene=SEMA4A
PLN	Phospholamban	Protein Coding	P26678	53	GC06P118548	2.52821	https://www.genecards.org/cgi-bin/carddisp.pl?gene=PLN
LPL	Lipoprotein Lipase	Protein Coding	P06858	59	GC08P019901	2.52566	https://www.genecards.org/cgi-bin/carddisp.pl?gene=LPL
NR1H4	Nuclear Receptor Subfamily 1 Group H Member 4	Protein Coding	Q96RI1	56	GC12P100473	2.52566	https://www.genecards.org/cgi-bin/carddisp.pl?gene=NR1H4
CCNB1	Cyclin B1	Protein Coding	P14635	56	GC05P069167	2.52296	https://www.genecards.org/cgi-bin/carddisp.pl?gene=CCNB1
CSF2	Colony Stimulating Factor 2	Protein Coding	P04141	54	GC05P132073	2.52296	https://www.genecards.org/cgi-bin/carddisp.pl?gene=CSF2
CYP2B6	Cytochrome P450 Family 2 Subfamily B Member 6	Protein Coding	P20813	54	GC19P040991	2.52296	https://www.genecards.org/cgi-bin/carddisp.pl?gene=CYP2B6
PSMC3	Proteasome 26S Subunit, ATPase 3	Protein Coding	P17980	53	GC11M125007	2.52296	https://www.genecards.org/cgi-bin/carddisp.pl?gene=PSMC3
PSMA4	Proteasome 20S Subunit Alpha 4	Protein Coding	P25789	52	GC15P078540	2.52296	https://www.genecards.org/cgi-bin/carddisp.pl?gene=PSMA4
GADD45GIP1	GADD45G Interacting Protein 1	Protein Coding	Q8TAE8	40	GC19M012953	2.52296	https://www.genecards.org/cgi-bin/carddisp.pl?gene=GADD45GIP1
SPATS2L	Spermatogenesis Associated Serine Rich 2 Like	Protein Coding	Q9NUQ6	40	GC02P200305	2.51581	https://www.genecards.org/cgi-bin/carddisp.pl?gene=SPATS2L
CAPN1	Calpain 1	Protein Coding	P07384	59	GC11P089060	2.51322	https://www.genecards.org/cgi-bin/carddisp.pl?gene=CAPN1
MMP7	Matrix Metallopeptidase 7	Protein Coding	P09237	56	GC11M126171	2.51322	https://www.genecards.org/cgi-bin/carddisp.pl?gene=MMP7
ANGPTL7	Angiopoietin Like 7	Protein Coding	O43827	46	GC01P011189	2.51246	https://www.genecards.org/cgi-bin/carddisp.pl?gene=ANGPTL7
SECISBP2	SECIS Binding Protein 2	Protein Coding	Q96T21	50	GC09P089318	2.51007	https://www.genecards.org/cgi-bin/carddisp.pl?gene=SECISBP2
SLC25A10	Solute Carrier Family 25 Member 10	Protein Coding	Q9UBX3	49	GC17P081712	2.51007	https://www.genecards.org/cgi-bin/carddisp.pl?gene=SLC25A10
UGT1A1	UDP Glucuronosyltransferase Family 1 Member A1	Protein Coding	P22309	59	GC02P233760	2.50718	https://www.genecards.org/cgi-bin/carddisp.pl?gene=UGT1A1
MRE11	MRE11 Homolog, Double Strand Break Repair Nuclease	Protein Coding	P49959	57	GC11M126070	2.50621	https://www.genecards.org/cgi-bin/carddisp.pl?gene=MRE11
MSR1	Macrophage Scavenger Receptor 1	Protein Coding	P21757	54	GC08M016107	2.50621	https://www.genecards.org/cgi-bin/carddisp.pl?gene=MSR1
HES1	Hes Family BHLH Transcription Factor 1	Protein Coding	Q14469	53	GC03P194136	2.50621	https://www.genecards.org/cgi-bin/carddisp.pl?gene=HES1
TRPC1	Transient Receptor Potential Cation Channel Subfamily C Member 1	Protein Coding	P48995	50	GC03P142724	2.50621	https://www.genecards.org/cgi-bin/carddisp.pl?gene=TRPC1
CSF1	Colony Stimulating Factor 1	Protein Coding	P09603	53	GC01P109911	2.50499	https://www.genecards.org/cgi-bin/carddisp.pl?gene=CSF1
PGF	Placental Growth Factor	Protein Coding	P49763	53	GC14M074941	2.50499	https://www.genecards.org/cgi-bin/carddisp.pl?gene=PGF
EEF1B2	Eukaryotic Translation Elongation Factor 1 Beta 2	Protein Coding	P24534	47	GC02P206159	2.50048	https://www.genecards.org/cgi-bin/carddisp.pl?gene=EEF1B2
FLT4	Fms Related Receptor Tyrosine Kinase 4	Protein Coding	P35916	61	GC05M182574	2.49437	https://www.genecards.org/cgi-bin/carddisp.pl?gene=FLT4
SLC2A10	Solute Carrier Family 2 Member 10	Protein Coding	O95528	52	GC20P046709	2.49437	https://www.genecards.org/cgi-bin/carddisp.pl?gene=SLC2A10
L2HGDH	L-2-Hydroxyglutarate Dehydrogenase	Protein Coding	Q9H9P8	47	GC14M050237	2.49437	https://www.genecards.org/cgi-bin/carddisp.pl?gene=L2HGDH
DDAH1	Dimethylarginine Dimethylaminohydrolase 1	Protein Coding	O94760	50	GC01M085318	2.49391	https://www.genecards.org/cgi-bin/carddisp.pl?gene=DDAH1
PSMA2	Proteasome 20S Subunit Alpha 2	Protein Coding	P25787	52	GC07M042916	2.49329	https://www.genecards.org/cgi-bin/carddisp.pl?gene=PSMA2
UHRF1	Ubiquitin Like With PHD And Ring Finger Domains 1	Protein Coding	Q96T88	48	GC19P112022	2.49329	https://www.genecards.org/cgi-bin/carddisp.pl?gene=UHRF1
HSPB6	Heat Shock Protein Family B (Small) Member 6	Protein Coding	O14558	45	GC19M092724	2.49329	https://www.genecards.org/cgi-bin/carddisp.pl?gene=HSPB6
FAM3A	FAM3 Metabolism Regulating Signaling Molecule A	Protein Coding	P98173	40	GC0XM154506	2.49329	https://www.genecards.org/cgi-bin/carddisp.pl?gene=FAM3A
HYOU1	Hypoxia Up-Regulated 1	Protein Coding	Q9Y4L1	53	GC11M126548	2.49258	https://www.genecards.org/cgi-bin/carddisp.pl?gene=HYOU1
G6PC1	Glucose-6-Phosphatase Catalytic Subunit 1	Protein Coding	P35575	52	GC17P113706	2.49239	https://www.genecards.org/cgi-bin/carddisp.pl?gene=G6PC1
EIF4ENIF1	Eukaryotic Translation Initiation Factor 4E Nuclear Import Factor 1	Protein Coding	Q9NRA8	44	GC22M031436	2.49235	https://www.genecards.org/cgi-bin/carddisp.pl?gene=EIF4ENIF1
SGCB	Sarcoglycan Beta	Protein Coding	Q16585	49	GC04M052019	2.48808	https://www.genecards.org/cgi-bin/carddisp.pl?gene=SGCB
RBPMS	RNA Binding Protein, MRNA Processing Factor	Protein Coding	Q93062	48	GC08P031170	2.48695	https://www.genecards.org/cgi-bin/carddisp.pl?gene=RBPMS
PABPC1	Poly(A) Binding Protein Cytoplasmic 1	Protein Coding	P11940	51	GC08M100685	2.48654	https://www.genecards.org/cgi-bin/carddisp.pl?gene=PABPC1
GRPEL1	GrpE Like 1, Mitochondrial	Protein Coding	Q9HAV7	48	GC04M007058	2.48471	https://www.genecards.org/cgi-bin/carddisp.pl?gene=GRPEL1
XPA	XPA, DNA Damage Recognition And Repair Factor	Protein Coding	P23025	54	GC09M097654	2.4837	https://www.genecards.org/cgi-bin/carddisp.pl?gene=XPA
MYD88	MYD88 Innate Immune Signal Transduction Adaptor	Protein Coding	Q99836	57	GC03P038290	2.48071	https://www.genecards.org/cgi-bin/carddisp.pl?gene=MYD88
FOXO6	Forkhead Box O6	Protein Coding	A8MYZ6	38	GC01P041361	2.48071	https://www.genecards.org/cgi-bin/carddisp.pl?gene=FOXO6
BID	BH3 Interacting Domain Death Agonist	Protein Coding	P55957	54	GC22M017734	2.48039	https://www.genecards.org/cgi-bin/carddisp.pl?gene=BID
CISD1	CDGSH Iron Sulfur Domain 1	Protein Coding	Q9NZ45	45	GC10P058269	2.4775	https://www.genecards.org/cgi-bin/carddisp.pl?gene=CISD1
FN3K	Fructosamine 3 Kinase	Protein Coding	Q9H479	42	GC17P082735	2.4775	https://www.genecards.org/cgi-bin/carddisp.pl?gene=FN3K
TRIM16	Tripartite Motif Containing 16	Protein Coding	O95361	40	GC17M015627	2.4775	https://www.genecards.org/cgi-bin/carddisp.pl?gene=TRIM16
SLC1A5	Solute Carrier Family 1 Member 5	Protein Coding	Q15758	53	GC19M092991	2.47631	https://www.genecards.org/cgi-bin/carddisp.pl?gene=SLC1A5
LPA	Lipoprotein(A)	Protein Coding	P08519	50	GC06M160531	2.47631	https://www.genecards.org/cgi-bin/carddisp.pl?gene=LPA
EIF4G1	Eukaryotic Translation Initiation Factor 4 Gamma 1	Protein Coding	Q04637	56	GC03P184314	2.46173	https://www.genecards.org/cgi-bin/carddisp.pl?gene=EIF4G1
MAP1LC3B	Microtubule Associated Protein 1 Light Chain 3 Beta	Protein Coding	Q9GZQ8	50	GC16P095222	2.46173	https://www.genecards.org/cgi-bin/carddisp.pl?gene=MAP1LC3B
FABP12	Fatty Acid Binding Protein 12	Protein Coding	A6NFH5	41	GC08M081524	2.46173	https://www.genecards.org/cgi-bin/carddisp.pl?gene=FABP12
PTGER2	Prostaglandin E Receptor 2	Protein Coding	P43116	57	GC14P052314	2.46169	https://www.genecards.org/cgi-bin/carddisp.pl?gene=PTGER2
PCCB	Propionyl-CoA Carboxylase Subunit Beta	Protein Coding	P05166	55	GC03P136250	2.46169	https://www.genecards.org/cgi-bin/carddisp.pl?gene=PCCB
IPO7	Importin 7	Protein Coding	O95373	42	GC11P009384	2.46169	https://www.genecards.org/cgi-bin/carddisp.pl?gene=IPO7
FUT8	Fucosyltransferase 8	Protein Coding	Q9BYC5	52	GC14P065356	2.45749	https://www.genecards.org/cgi-bin/carddisp.pl?gene=FUT8
IL6ST	Interleukin 6 Cytokine Family Signal Transducer	Protein Coding	P40189	59	GC05M055935	2.45402	https://www.genecards.org/cgi-bin/carddisp.pl?gene=IL6ST
SOX9	SRY-Box Transcription Factor 9	Protein Coding	P48436	54	GC17P072121	2.45402	https://www.genecards.org/cgi-bin/carddisp.pl?gene=SOX9
PRMT5	Protein Arginine Methyltransferase 5	Protein Coding	O14744	53	GC14M022920	2.45402	https://www.genecards.org/cgi-bin/carddisp.pl?gene=PRMT5
GRP	Gastrin Releasing Peptide	Protein Coding	P07492	50	GC18P059220	2.45402	https://www.genecards.org/cgi-bin/carddisp.pl?gene=GRP
SEPTIN4	Septin 4	Protein Coding	O43236	48	GC17M078442	2.45402	https://www.genecards.org/cgi-bin/carddisp.pl?gene=SEPTIN4
PKP3	Plakophilin 3	Protein Coding	Q9Y446	46	GC11P010575	2.45402	https://www.genecards.org/cgi-bin/carddisp.pl?gene=PKP3
SMPD3	Sphingomyelin Phosphodiesterase 3	Protein Coding	Q9NY59	49	GC16M068358	2.44839	https://www.genecards.org/cgi-bin/carddisp.pl?gene=SMPD3
NBN	Nibrin	Protein Coding	O60934	57	GC08M089933	2.44795	https://www.genecards.org/cgi-bin/carddisp.pl?gene=NBN
AFG3L2	AFG3 Like Matrix AAA Peptidase Subunit 2	Protein Coding	Q9Y4W6	53	GC18M012328	2.4394	https://www.genecards.org/cgi-bin/carddisp.pl?gene=AFG3L2
HTRA1	HtrA Serine Peptidase 1	Protein Coding	Q92743	54	GC10P122461	2.43902	https://www.genecards.org/cgi-bin/carddisp.pl?gene=HTRA1
RGN	Regucalcin	Protein Coding	Q15493	46	GC0XP057452	2.43902	https://www.genecards.org/cgi-bin/carddisp.pl?gene=RGN
APOA4	Apolipoprotein A4	Protein Coding	P06727	50	GC11M116820	2.43657	https://www.genecards.org/cgi-bin/carddisp.pl?gene=APOA4
MAP3K2	Mitogen-Activated Protein Kinase Kinase Kinase 2	Protein Coding	Q9Y2U5	52	GC02M127298	2.43548	https://www.genecards.org/cgi-bin/carddisp.pl?gene=MAP3K2
POLI	DNA Polymerase Iota	Protein Coding	Q9UNA4	52	GC18P054274	2.43548	https://www.genecards.org/cgi-bin/carddisp.pl?gene=POLI
CAPN9	Calpain 9	Protein Coding	O14815	48	GC01P230747	2.43497	https://www.genecards.org/cgi-bin/carddisp.pl?gene=CAPN9
OSCAR	Osteoclast Associated Ig-Like Receptor	Protein Coding	Q8IYS5	43	GC19M054094	2.43497	https://www.genecards.org/cgi-bin/carddisp.pl?gene=OSCAR
RPTOR	Regulatory Associated Protein Of MTOR Complex 1	Protein Coding	Q8N122	52	GC17P080544	2.43461	https://www.genecards.org/cgi-bin/carddisp.pl?gene=RPTOR
SREBF2	Sterol Regulatory Element Binding Transcription Factor 2	Protein Coding	Q12772	52	GC22P041833	2.43082	https://www.genecards.org/cgi-bin/carddisp.pl?gene=SREBF2
GLRX3	Glutaredoxin 3	Protein Coding	O76003	48	GC10P130136	2.42775	https://www.genecards.org/cgi-bin/carddisp.pl?gene=GLRX3
PIAS4	Protein Inhibitor Of Activated STAT 4	Protein Coding	Q8N2W9	47	GC19P004007	2.42775	https://www.genecards.org/cgi-bin/carddisp.pl?gene=PIAS4
SORD	Sorbitol Dehydrogenase	Protein Coding	Q00796	56	GC15P045023	2.42772	https://www.genecards.org/cgi-bin/carddisp.pl?gene=SORD
ADRB1	Adrenoceptor Beta 1	Protein Coding	P08588	57	GC10P114046	2.42595	https://www.genecards.org/cgi-bin/carddisp.pl?gene=ADRB1
KLF5	KLF Transcription Factor 5	Protein Coding	Q13887	53	GC13P073054	2.42595	https://www.genecards.org/cgi-bin/carddisp.pl?gene=KLF5
SLC4A2	Solute Carrier Family 4 Member 2	Protein Coding	P04920	50	GC07P151057	2.42595	https://www.genecards.org/cgi-bin/carddisp.pl?gene=SLC4A2
CALM1	Calmodulin 1	Protein Coding	P0DP23	54	GC14P090396	2.42564	https://www.genecards.org/cgi-bin/carddisp.pl?gene=CALM1
SLC12A2	Solute Carrier Family 12 Member 2	Protein Coding	P55011	59	GC05P128083	2.41548	https://www.genecards.org/cgi-bin/carddisp.pl?gene=SLC12A2
OPA1	OPA1 Mitochondrial Dynamin Like GTPase	Protein Coding	O60313	53	GC03P193594	2.41548	https://www.genecards.org/cgi-bin/carddisp.pl?gene=OPA1
CYB5R3	Cytochrome B5 Reductase 3	Protein Coding	P00387	54	GC22M077135	2.40643	https://www.genecards.org/cgi-bin/carddisp.pl?gene=CYB5R3
GPI	Glucose-6-Phosphate Isomerase	Protein Coding	P06744	56	GC19P034359	2.39628	https://www.genecards.org/cgi-bin/carddisp.pl?gene=GPI
ADORA2A	Adenosine A2a Receptor	Protein Coding	P29274	55	GC22P024417	2.39628	https://www.genecards.org/cgi-bin/carddisp.pl?gene=ADORA2A
IL17RA	Interleukin 17 Receptor A	Protein Coding	Q96F46	55	GC22P069829	2.39628	https://www.genecards.org/cgi-bin/carddisp.pl?gene=IL17RA
SLC6A2	Solute Carrier Family 6 Member 2	Protein Coding	P23975	55	GC16P082398	2.39628	https://www.genecards.org/cgi-bin/carddisp.pl?gene=SLC6A2
HTATIP2	HIV-1 Tat Interactive Protein 2	Protein Coding	Q9BUP3	48	GC11P020363	2.39628	https://www.genecards.org/cgi-bin/carddisp.pl?gene=HTATIP2
PSMD10	Proteasome 26S Subunit, Non-ATPase 10	Protein Coding	O75832	47	GC0XM108084	2.39628	https://www.genecards.org/cgi-bin/carddisp.pl?gene=PSMD10
FASN	Fatty Acid Synthase	Protein Coding	P49327	58	GC17M082078	2.39115	https://www.genecards.org/cgi-bin/carddisp.pl?gene=FASN
ABCG2	ATP Binding Cassette Subfamily G Member 2 (JR Blood Group)	Protein Coding	Q9UNQ0	59	GC04M088090	2.39102	https://www.genecards.org/cgi-bin/carddisp.pl?gene=ABCG2
ADRB2	Adrenoceptor Beta 2	Protein Coding	P07550	57	GC05P152320	2.39102	https://www.genecards.org/cgi-bin/carddisp.pl?gene=ADRB2
TGFBR1	Transforming Growth Factor Beta Receptor 1	Protein Coding	P36897	62	GC09P100712	2.39085	https://www.genecards.org/cgi-bin/carddisp.pl?gene=TGFBR1
TNC	Tenascin C	Protein Coding	P24821	58	GC09M115019	2.39085	https://www.genecards.org/cgi-bin/carddisp.pl?gene=TNC
MTTP	Microsomal Triglyceride Transfer Protein	Protein Coding	P55157	53	GC04P099563	2.39085	https://www.genecards.org/cgi-bin/carddisp.pl?gene=MTTP
RHD	Rh Blood Group D Antigen	Protein Coding	Q02161	50	GC01P025272	2.39085	https://www.genecards.org/cgi-bin/carddisp.pl?gene=RHD
EPRS1	Glutamyl-Prolyl-TRNA Synthetase 1	Protein Coding	P07814	53	GC01M219969	2.38447	https://www.genecards.org/cgi-bin/carddisp.pl?gene=EPRS1
SET	SET Nuclear Proto-Oncogene	Protein Coding	Q01105	51	GC09P141431	2.38447	https://www.genecards.org/cgi-bin/carddisp.pl?gene=SET
E2F3	E2F Transcription Factor 3	Protein Coding	O00716	51	GC06P020419	2.38325	https://www.genecards.org/cgi-bin/carddisp.pl?gene=E2F3
GLP1R	Glucagon Like Peptide 1 Receptor	Protein Coding	P43220	55	GC06P039048	2.38181	https://www.genecards.org/cgi-bin/carddisp.pl?gene=GLP1R
ATP6AP1	ATPase H+ Transporting Accessory Protein 1	Protein Coding	Q15904	53	GC0XP154428	2.36777	https://www.genecards.org/cgi-bin/carddisp.pl?gene=ATP6AP1
LYAR	Ly1 Antibody Reactive	Protein Coding	Q9NX58	46	GC04M005113	2.36614	https://www.genecards.org/cgi-bin/carddisp.pl?gene=LYAR
HMGA2	High Mobility Group AT-Hook 2	Protein Coding	P52926	52	GC12P065824	2.36564	https://www.genecards.org/cgi-bin/carddisp.pl?gene=HMGA2
MARK2	Microtubule Affinity Regulating Kinase 2	Protein Coding	Q7KZI7	49	GC11P063838	2.36564	https://www.genecards.org/cgi-bin/carddisp.pl?gene=MARK2
ICMT	Isoprenylcysteine Carboxyl Methyltransferase	Protein Coding	O60725	48	GC01M014311	2.36564	https://www.genecards.org/cgi-bin/carddisp.pl?gene=ICMT
SMURF2	SMAD Specific E3 Ubiquitin Protein Ligase 2	Protein Coding	Q9HAU4	47	GC17M064542	2.36564	https://www.genecards.org/cgi-bin/carddisp.pl?gene=SMURF2
MT1F	Metallothionein 1F	Protein Coding	P04733	40	GC16P056657	2.36564	https://www.genecards.org/cgi-bin/carddisp.pl?gene=MT1F
FGFR1	Fibroblast Growth Factor Receptor 1	Protein Coding	P11362	63	GC08M038400	2.36469	https://www.genecards.org/cgi-bin/carddisp.pl?gene=FGFR1
MTRR	5-Methyltetrahydrofolate-Homocysteine Methyltransferase Reductase	Protein Coding	Q9UBK8	53	GC05P007851	2.36469	https://www.genecards.org/cgi-bin/carddisp.pl?gene=MTRR
POLR2A	RNA Polymerase II Subunit A	Protein Coding	P24928	53	GC17P111182	2.36469	https://www.genecards.org/cgi-bin/carddisp.pl?gene=POLR2A
SCO2	Synthesis Of Cytochrome C Oxidase 2	Protein Coding	O43819	53	GC22M050523	2.36469	https://www.genecards.org/cgi-bin/carddisp.pl?gene=SCO2
FABP2	Fatty Acid Binding Protein 2	Protein Coding	P12104	50	GC04M119317	2.36469	https://www.genecards.org/cgi-bin/carddisp.pl?gene=FABP2
PTP4A1	Protein Tyrosine Phosphatase 4A1	Protein Coding	Q93096	49	GC06P135294	2.36469	https://www.genecards.org/cgi-bin/carddisp.pl?gene=PTP4A1
COG2	Component Of Oligomeric Golgi Complex 2	Protein Coding	Q14746	48	GC01P230642	2.36469	https://www.genecards.org/cgi-bin/carddisp.pl?gene=COG2
NUP88	Nucleoporin 88	Protein Coding	Q99567	47	GC17M074750	2.36469	https://www.genecards.org/cgi-bin/carddisp.pl?gene=NUP88
CTH	Cystathionine Gamma-Lyase	Protein Coding	P32929	56	GC01P070411	2.36293	https://www.genecards.org/cgi-bin/carddisp.pl?gene=CTH
STAU2	Staufen Double-Stranded RNA Binding Protein 2	Protein Coding	Q9NUL3	43	GC08M073421	2.36035	https://www.genecards.org/cgi-bin/carddisp.pl?gene=STAU2
DRD1	Dopamine Receptor D1	Protein Coding	P21728	53	GC05M175440	2.35214	https://www.genecards.org/cgi-bin/carddisp.pl?gene=DRD1
BSCL2	BSCL2 Lipid Droplet Biogenesis Associated, Seipin	Protein Coding	Q96G97	52	GC11M125248	2.34953	https://www.genecards.org/cgi-bin/carddisp.pl?gene=BSCL2
TP53I3	Tumor Protein P53 Inducible Protein 3	Protein Coding	Q53FA7	47	GC02M024078	2.34226	https://www.genecards.org/cgi-bin/carddisp.pl?gene=TP53I3
GH1	Growth Hormone 1	Protein Coding	P01241	52	GC17M063917	2.33895	https://www.genecards.org/cgi-bin/carddisp.pl?gene=GH1
RPS27	Ribosomal Protein S27	Protein Coding	P42677	51	GC01P164469	2.33895	https://www.genecards.org/cgi-bin/carddisp.pl?gene=RPS27
TNPO1	Transportin 1	Protein Coding	Q92973	50	GC05P072816	2.33895	https://www.genecards.org/cgi-bin/carddisp.pl?gene=TNPO1
IL37	Interleukin 37	Protein Coding	Q9NZH6	48	GC02P143683	2.33895	https://www.genecards.org/cgi-bin/carddisp.pl?gene=IL37
DGKZ	Diacylglycerol Kinase Zeta	Protein Coding	Q13574	45	GC11P046332	2.33895	https://www.genecards.org/cgi-bin/carddisp.pl?gene=DGKZ
ELF5	E74 Like ETS Transcription Factor 5	Protein Coding	Q9UKW6	45	GC11M034500	2.33895	https://www.genecards.org/cgi-bin/carddisp.pl?gene=ELF5
PDGFRB	Platelet Derived Growth Factor Receptor Beta	Protein Coding	P09619	62	GC05M150113	2.33882	https://www.genecards.org/cgi-bin/carddisp.pl?gene=PDGFRB
ANGPT1	Angiopoietin 1	Protein Coding	Q15389	54	GC08M107246	2.33882	https://www.genecards.org/cgi-bin/carddisp.pl?gene=ANGPT1
CYP2D6	Cytochrome P450 Family 2 Subfamily D Member 6	Protein Coding	P10635	56	GC22M042126	2.33822	https://www.genecards.org/cgi-bin/carddisp.pl?gene=CYP2D6
ROCK2	Rho Associated Coiled-Coil Containing Protein Kinase 2	Protein Coding	O75116	53	GC02M011472	2.33822	https://www.genecards.org/cgi-bin/carddisp.pl?gene=ROCK2
ADSL	Adenylosuccinate Lyase	Protein Coding	P30566	56	GC22P040346	2.33418	https://www.genecards.org/cgi-bin/carddisp.pl?gene=ADSL
LBR	Lamin B Receptor	Protein Coding	Q14739	55	GC01M225401	2.33075	https://www.genecards.org/cgi-bin/carddisp.pl?gene=LBR
PCCA	Propionyl-CoA Carboxylase Subunit Alpha	Protein Coding	P05165	55	GC13P100089	2.33075	https://www.genecards.org/cgi-bin/carddisp.pl?gene=PCCA
CEBPA	CCAAT Enhancer Binding Protein Alpha	Protein Coding	P49715	54	GC19M033299	2.33075	https://www.genecards.org/cgi-bin/carddisp.pl?gene=CEBPA
CD80	CD80 Molecule	Protein Coding	P33681	52	GC03M119524	2.33075	https://www.genecards.org/cgi-bin/carddisp.pl?gene=CD80
MAP3K11	Mitogen-Activated Protein Kinase Kinase Kinase 11	Protein Coding	Q16584	49	GC11M125388	2.33075	https://www.genecards.org/cgi-bin/carddisp.pl?gene=MAP3K11
PSMC6	Proteasome 26S Subunit, ATPase 6	Protein Coding	P62333	48	GC14P052707	2.33075	https://www.genecards.org/cgi-bin/carddisp.pl?gene=PSMC6
TRIM27	Tripartite Motif Containing 27	Protein Coding	P14373	46	GC06M028903	2.33075	https://www.genecards.org/cgi-bin/carddisp.pl?gene=TRIM27
RHOD	Ras Homolog Family Member D	Protein Coding	O00212	45	GC11P089221	2.33075	https://www.genecards.org/cgi-bin/carddisp.pl?gene=RHOD
PDK2	Pyruvate Dehydrogenase Kinase 2	Protein Coding	Q15119	49	GC17P112614	2.32754	https://www.genecards.org/cgi-bin/carddisp.pl?gene=PDK2
PIWIL4	Piwi Like RNA-Mediated Gene Silencing 4	Protein Coding	Q7Z3Z4	46	GC11P094543	2.32754	https://www.genecards.org/cgi-bin/carddisp.pl?gene=PIWIL4
BDH2	3-Hydroxybutyrate Dehydrogenase 2	Protein Coding	Q9BUT1	44	GC04M103077	2.32754	https://www.genecards.org/cgi-bin/carddisp.pl?gene=BDH2
BRD4	Bromodomain Containing 4	Protein Coding	O60885	55	GC19M092256	2.32097	https://www.genecards.org/cgi-bin/carddisp.pl?gene=BRD4
NEDD8	NEDD8 Ubiquitin Like Modifier	Protein Coding	Q15843	48	GC14M024216	2.32055	https://www.genecards.org/cgi-bin/carddisp.pl?gene=NEDD8
PAPPA	Pappalysin 1	Protein Coding	Q13219	51	GC09P124390	2.31376	https://www.genecards.org/cgi-bin/carddisp.pl?gene=PAPPA
HSD17B4	Hydroxysteroid 17-Beta Dehydrogenase 4	Protein Coding	P51659	55	GC05P119452	2.31089	https://www.genecards.org/cgi-bin/carddisp.pl?gene=HSD17B4
NUP214	Nucleoporin 214	Protein Coding	P35658	52	GC09P131125	2.31089	https://www.genecards.org/cgi-bin/carddisp.pl?gene=NUP214
PPP2R2A	Protein Phosphatase 2 Regulatory Subunit Balpha	Protein Coding	P63151	52	GC08P026292	2.31089	https://www.genecards.org/cgi-bin/carddisp.pl?gene=PPP2R2A
ZFHX3	Zinc Finger Homeobox 3	Protein Coding	Q15911	52	GC16M072782	2.31089	https://www.genecards.org/cgi-bin/carddisp.pl?gene=ZFHX3
HOMER1	Homer Scaffold Protein 1	Protein Coding	Q86YM7	51	GC05M079372	2.31089	https://www.genecards.org/cgi-bin/carddisp.pl?gene=HOMER1
MRTFA	Myocardin Related Transcription Factor A	Protein Coding	Q969V6	49	GC22M077944	2.31089	https://www.genecards.org/cgi-bin/carddisp.pl?gene=MRTFA
GRK4	G Protein-Coupled Receptor Kinase 4	Protein Coding	P32298	48	GC04P002963	2.31089	https://www.genecards.org/cgi-bin/carddisp.pl?gene=GRK4
DUSP13B	Dual Specificity Phosphatase 13B	Protein Coding	Q9UII6	46	GC10M075094	2.31089	https://www.genecards.org/cgi-bin/carddisp.pl?gene=DUSP13B
CCAR2	Cell Cycle And Apoptosis Regulator 2	Protein Coding	Q8N163	45	GC08P022604	2.31089	https://www.genecards.org/cgi-bin/carddisp.pl?gene=CCAR2
ACADVL	Acyl-CoA Dehydrogenase Very Long Chain	Protein Coding	P49748	54	GC17P111148	2.31076	https://www.genecards.org/cgi-bin/carddisp.pl?gene=ACADVL
CKB	Creatine Kinase B	Protein Coding	P12277	54	GC14M103519	2.31076	https://www.genecards.org/cgi-bin/carddisp.pl?gene=CKB
ATP8A1	ATPase Phospholipid Transporting 8A1	Protein Coding	Q9Y2Q0	48	GC04M042410	2.31076	https://www.genecards.org/cgi-bin/carddisp.pl?gene=ATP8A1
TALDO1	Transaldolase 1	Protein Coding	P37837	54	GC11P010619	2.30561	https://www.genecards.org/cgi-bin/carddisp.pl?gene=TALDO1
CAPN3	Calpain 3	Protein Coding	P20807	56	GC15P042359	2.30368	https://www.genecards.org/cgi-bin/carddisp.pl?gene=CAPN3
BARD1	BRCA1 Associated RING Domain 1	Protein Coding	Q99728	55	GC02M214725	2.30368	https://www.genecards.org/cgi-bin/carddisp.pl?gene=BARD1
IGFBP1	Insulin Like Growth Factor Binding Protein 1	Protein Coding	P08833	52	GC07P049577	2.29609	https://www.genecards.org/cgi-bin/carddisp.pl?gene=IGFBP1
H4C1	H4 Clustered Histone 1	Protein Coding	P62805	41	GC06P134575	2.29609	https://www.genecards.org/cgi-bin/carddisp.pl?gene=H4C1
DBH	Dopamine Beta-Hydroxylase	Protein Coding	P09172	60	GC09P133636	2.29384	https://www.genecards.org/cgi-bin/carddisp.pl?gene=DBH
SCNN1A	Sodium Channel Epithelial 1 Subunit Alpha	Protein Coding	P37088	58	GC12M006346	2.29384	https://www.genecards.org/cgi-bin/carddisp.pl?gene=SCNN1A
PDE4A	Phosphodiesterase 4A	Protein Coding	P27815	54	GC19P010416	2.29384	https://www.genecards.org/cgi-bin/carddisp.pl?gene=PDE4A
HRH2	Histamine Receptor H2	Protein Coding	P25021	52	GC05P175659	2.29384	https://www.genecards.org/cgi-bin/carddisp.pl?gene=HRH2
ABCG1	ATP Binding Cassette Subfamily G Member 1	Protein Coding	P45844	51	GC21P042199	2.29384	https://www.genecards.org/cgi-bin/carddisp.pl?gene=ABCG1
MYOT	Myotilin	Protein Coding	Q9UBF9	50	GC05P137867	2.29384	https://www.genecards.org/cgi-bin/carddisp.pl?gene=MYOT
PSMD8	Proteasome 26S Subunit, Non-ATPase 8	Protein Coding	P48556	50	GC19P038374	2.29384	https://www.genecards.org/cgi-bin/carddisp.pl?gene=PSMD8
HBE1	Hemoglobin Subunit Epsilon 1	Protein Coding	P02100	46	GC11M005268	2.29384	https://www.genecards.org/cgi-bin/carddisp.pl?gene=HBE1
NFKBIE	NFKB Inhibitor Epsilon	Protein Coding	O00221	46	GC06M044258	2.29384	https://www.genecards.org/cgi-bin/carddisp.pl?gene=NFKBIE
KHSRP	KH-Type Splicing Regulatory Protein	Protein Coding	Q92945	45	GC19M006413	2.29384	https://www.genecards.org/cgi-bin/carddisp.pl?gene=KHSRP
FGFR2	Fibroblast Growth Factor Receptor 2	Protein Coding	P21802	64	GC10M121478	2.28825	https://www.genecards.org/cgi-bin/carddisp.pl?gene=FGFR2
CASP6	Caspase 6	Protein Coding	P55212	57	GC04M109688	2.28825	https://www.genecards.org/cgi-bin/carddisp.pl?gene=CASP6
ACO2	Aconitase 2	Protein Coding	Q99798	55	GC22P070710	2.28825	https://www.genecards.org/cgi-bin/carddisp.pl?gene=ACO2
CD38	CD38 Molecule	Protein Coding	P28907	55	GC04P024672	2.28825	https://www.genecards.org/cgi-bin/carddisp.pl?gene=CD38
TIMP2	TIMP Metallopeptidase Inhibitor 2	Protein Coding	P16035	50	GC17M078852	2.28825	https://www.genecards.org/cgi-bin/carddisp.pl?gene=TIMP2
UBE2D2	Ubiquitin Conjugating Enzyme E2 D2	Protein Coding	P62837	50	GC05P139526	2.28825	https://www.genecards.org/cgi-bin/carddisp.pl?gene=UBE2D2
TIGAR	TP53 Induced Glycolysis Regulatory Phosphatase	Protein Coding	Q9NQ88	45	GC12P038924	2.28825	https://www.genecards.org/cgi-bin/carddisp.pl?gene=TIGAR
HSPA14	Heat Shock Protein Family A (Hsp70) Member 14	Protein Coding	Q0VDF9	46	GC10P014860	2.28791	https://www.genecards.org/cgi-bin/carddisp.pl?gene=HSPA14
IFNAR1	Interferon Alpha And Beta Receptor Subunit 1	Protein Coding	P17181	57	GC21P033324	2.28121	https://www.genecards.org/cgi-bin/carddisp.pl?gene=IFNAR1
ABCC3	ATP Binding Cassette Subfamily C Member 3	Protein Coding	O15438	53	GC17P050634	2.28121	https://www.genecards.org/cgi-bin/carddisp.pl?gene=ABCC3
ADGRE5	Adhesion G Protein-Coupled Receptor E5	Protein Coding	P48960	52	GC19P112518	2.28121	https://www.genecards.org/cgi-bin/carddisp.pl?gene=ADGRE5
LATS1	Large Tumor Suppressor Kinase 1	Protein Coding	O95835	52	GC06M149658	2.28121	https://www.genecards.org/cgi-bin/carddisp.pl?gene=LATS1
RUVBL2	RuvB Like AAA ATPase 2	Protein Coding	Q9Y230	51	GC19P048993	2.28121	https://www.genecards.org/cgi-bin/carddisp.pl?gene=RUVBL2
BAG6	BAG Cochaperone 6	Protein Coding	P46379	47	GC06M031639	2.28121	https://www.genecards.org/cgi-bin/carddisp.pl?gene=BAG6
NUCB2	Nucleobindin 2	Protein Coding	P80303	46	GC11P017901	2.28121	https://www.genecards.org/cgi-bin/carddisp.pl?gene=NUCB2
CCT3	Chaperonin Containing TCP1 Subunit 3	Protein Coding	P49368	45	GC01M156308	2.28121	https://www.genecards.org/cgi-bin/carddisp.pl?gene=CCT3
HNRNPAB	Heterogeneous Nuclear Ribonucleoprotein A/B	Protein Coding	Q99729	44	GC05P178204	2.28121	https://www.genecards.org/cgi-bin/carddisp.pl?gene=HNRNPAB
DDX24	DEAD-Box Helicase 24	Protein Coding	Q9GZR7	43	GC14M094048	2.28121	https://www.genecards.org/cgi-bin/carddisp.pl?gene=DDX24
CGB5	Chorionic Gonadotropin Subunit Beta 5	Protein Coding	P0DN86	38	GC19P049043	2.28121	https://www.genecards.org/cgi-bin/carddisp.pl?gene=CGB5
TNFRSF10B	TNF Receptor Superfamily Member 10b	Protein Coding	O14763	59	GC08M023020	2.28109	https://www.genecards.org/cgi-bin/carddisp.pl?gene=TNFRSF10B
ACADM	Acyl-CoA Dehydrogenase Medium Chain	Protein Coding	P11310	55	GC01P075724	2.28109	https://www.genecards.org/cgi-bin/carddisp.pl?gene=ACADM
RIPK3	Receptor Interacting Serine/Threonine Kinase 3	Protein Coding	Q9Y572	52	GC14M024336	2.28109	https://www.genecards.org/cgi-bin/carddisp.pl?gene=RIPK3
DPYSL2	Dihydropyrimidinase Like 2	Protein Coding	Q16555	54	GC08P026514	2.27629	https://www.genecards.org/cgi-bin/carddisp.pl?gene=DPYSL2
SAT1	Spermidine/Spermine N1-Acetyltransferase 1	Protein Coding	P21673	54	GC0XP023784	2.27629	https://www.genecards.org/cgi-bin/carddisp.pl?gene=SAT1
MAP2	Microtubule Associated Protein 2	Protein Coding	P11137	53	GC02P209424	2.27629	https://www.genecards.org/cgi-bin/carddisp.pl?gene=MAP2
CAPN6	Calpain 6	Protein Coding	Q9Y6Q1	45	GC0XM111245	2.26203	https://www.genecards.org/cgi-bin/carddisp.pl?gene=CAPN6
KIF12	Kinesin Family Member 12	Protein Coding	Q96FN5	44	GC09M114086	2.26203	https://www.genecards.org/cgi-bin/carddisp.pl?gene=KIF12
CAPN7	Calpain 7	Protein Coding	Q9Y6W3	43	GC03P021658	2.26203	https://www.genecards.org/cgi-bin/carddisp.pl?gene=CAPN7
THBS1	Thrombospondin 1	Protein Coding	P07996	54	GC15P039581	2.26156	https://www.genecards.org/cgi-bin/carddisp.pl?gene=THBS1
SYVN1	Synoviolin 1	Protein Coding	Q86TM6	50	GC11M125363	2.26156	https://www.genecards.org/cgi-bin/carddisp.pl?gene=SYVN1
ADNP	Activity Dependent Neuroprotector Homeobox	Protein Coding	Q9H2P0	52	GC20M050888	2.25301	https://www.genecards.org/cgi-bin/carddisp.pl?gene=ADNP
PSMC2	Proteasome 26S Subunit, ATPase 2	Protein Coding	P35998	50	GC07P103328	2.25301	https://www.genecards.org/cgi-bin/carddisp.pl?gene=PSMC2
ANXA6	Annexin A6	Protein Coding	P08133	52	GC05M151100	2.25275	https://www.genecards.org/cgi-bin/carddisp.pl?gene=ANXA6
PPA1	Inorganic Pyrophosphatase 1	Protein Coding	Q15181	47	GC10M070202	2.25275	https://www.genecards.org/cgi-bin/carddisp.pl?gene=PPA1
GNAQ	G Protein Subunit Alpha Q	Protein Coding	P50148	58	GC09M077716	2.24962	https://www.genecards.org/cgi-bin/carddisp.pl?gene=GNAQ
TGFB3	Transforming Growth Factor Beta 3	Protein Coding	P10600	56	GC14M075958	2.24962	https://www.genecards.org/cgi-bin/carddisp.pl?gene=TGFB3
SLC25A13	Solute Carrier Family 25 Member 13	Protein Coding	Q9UJS0	53	GC07M096120	2.24962	https://www.genecards.org/cgi-bin/carddisp.pl?gene=SLC25A13
HAS3	Hyaluronan Synthase 3	Protein Coding	O00219	50	GC16P069083	2.24962	https://www.genecards.org/cgi-bin/carddisp.pl?gene=HAS3
NLK	Nemo Like Kinase	Protein Coding	Q9UBE8	50	GC17P111724	2.24962	https://www.genecards.org/cgi-bin/carddisp.pl?gene=NLK
PDCD10	Programmed Cell Death 10	Protein Coding	Q9BUL8	50	GC03M167683	2.24962	https://www.genecards.org/cgi-bin/carddisp.pl?gene=PDCD10
BCL3	BCL3 Transcription Coactivator	Protein Coding	P20749	49	GC19P044747	2.24962	https://www.genecards.org/cgi-bin/carddisp.pl?gene=BCL3
LCN1	Lipocalin 1	Protein Coding	P31025	45	GC09P135521	2.24962	https://www.genecards.org/cgi-bin/carddisp.pl?gene=LCN1
RPL36A-HNRNPH2	RPL36A-HNRNPH2 Readthrough	Protein Coding		24	GC0XP101398	2.24962	https://www.genecards.org/cgi-bin/carddisp.pl?gene=RPL36A-HNRNPH2
ALPP	Alkaline Phosphatase, Placental	Protein Coding	P05187	53	GC02P232378	2.24872	https://www.genecards.org/cgi-bin/carddisp.pl?gene=ALPP
NUDT5	Nudix Hydrolase 5	Protein Coding	Q9UKK9	44	GC10M012165	2.24872	https://www.genecards.org/cgi-bin/carddisp.pl?gene=NUDT5
EED	Embryonic Ectoderm Development	Protein Coding	O75530	52	GC11P090426	2.24112	https://www.genecards.org/cgi-bin/carddisp.pl?gene=EED
H3-3A	H3.3 Histone A	Protein Coding	P84243	50	GC01P226062	2.24112	https://www.genecards.org/cgi-bin/carddisp.pl?gene=H3-3A
ARNT	Aryl Hydrocarbon Receptor Nuclear Translocator	Protein Coding	P27540	54	GC01M150809	2.23616	https://www.genecards.org/cgi-bin/carddisp.pl?gene=ARNT
MSH6	MutS Homolog 6	Protein Coding	P52701	58	GC02P047695	2.23349	https://www.genecards.org/cgi-bin/carddisp.pl?gene=MSH6
NTRK1	Neurotrophic Receptor Tyrosine Kinase 1	Protein Coding	P04629	58	GC01P156815	2.23349	https://www.genecards.org/cgi-bin/carddisp.pl?gene=NTRK1
SFTPA1	Surfactant Protein A1	Protein Coding	Q8IWL2	53	GC10P112479	2.23349	https://www.genecards.org/cgi-bin/carddisp.pl?gene=SFTPA1
SELL	Selectin L	Protein Coding	P14151	52	GC01M169690	2.23349	https://www.genecards.org/cgi-bin/carddisp.pl?gene=SELL
DLD	Dihydrolipoamide Dehydrogenase	Protein Coding	P09622	56	GC07P107906	2.22829	https://www.genecards.org/cgi-bin/carddisp.pl?gene=DLD
CSTB	Cystatin B	Protein Coding	P04080	55	GC21M043772	2.22829	https://www.genecards.org/cgi-bin/carddisp.pl?gene=CSTB
MDH2	Malate Dehydrogenase 2	Protein Coding	P40926	55	GC07P076048	2.22829	https://www.genecards.org/cgi-bin/carddisp.pl?gene=MDH2
HNF1B	HNF1 Homeobox B	Protein Coding	P35680	52	GC17M037686	2.22829	https://www.genecards.org/cgi-bin/carddisp.pl?gene=HNF1B
CPT2	Carnitine Palmitoyltransferase 2	Protein Coding	P23786	59	GC01P053196	2.21568	https://www.genecards.org/cgi-bin/carddisp.pl?gene=CPT2
CGA	Glycoprotein Hormones, Alpha Polypeptide	Protein Coding	P01215	54	GC06M087085	2.21568	https://www.genecards.org/cgi-bin/carddisp.pl?gene=CGA
NTF3	Neurotrophin 3	Protein Coding	P20783	53	GC12P038933	2.21568	https://www.genecards.org/cgi-bin/carddisp.pl?gene=NTF3
SERPINA3	Serpin Family A Member 3	Protein Coding	P01011	52	GC14P094612	2.21568	https://www.genecards.org/cgi-bin/carddisp.pl?gene=SERPINA3
SDC4	Syndecan 4	Protein Coding	P31431	51	GC20M045325	2.21568	https://www.genecards.org/cgi-bin/carddisp.pl?gene=SDC4
PAEP	Progestagen Associated Endometrial Protein	Protein Coding	P09466	48	GC09P135561	2.21568	https://www.genecards.org/cgi-bin/carddisp.pl?gene=PAEP
CARHSP1	Calcium Regulated Heat Stable Protein 1	Protein Coding	Q9Y2V2	44	GC16M008852	2.21568	https://www.genecards.org/cgi-bin/carddisp.pl?gene=CARHSP1
MME	Membrane Metalloendopeptidase	Protein Coding	P08473	59	GC03P155024	2.20382	https://www.genecards.org/cgi-bin/carddisp.pl?gene=MME
NRG1	Neuregulin 1	Protein Coding	Q02297	58	GC08P031639	2.20382	https://www.genecards.org/cgi-bin/carddisp.pl?gene=NRG1
HNRNPR	Heterogeneous Nuclear Ribonucleoprotein R	Protein Coding	O43390	49	GC01M023303	2.20382	https://www.genecards.org/cgi-bin/carddisp.pl?gene=HNRNPR
SLC16A4	Solute Carrier Family 16 Member 4	Protein Coding	O15374	46	GC01M110362	2.20382	https://www.genecards.org/cgi-bin/carddisp.pl?gene=SLC16A4
HK1	Hexokinase 1	Protein Coding	P19367	59	GC10P069269	2.20279	https://www.genecards.org/cgi-bin/carddisp.pl?gene=HK1
ZAP70	Zeta Chain Of T Cell Receptor Associated Protein Kinase 70	Protein Coding	P43403	59	GC02P097943	2.20279	https://www.genecards.org/cgi-bin/carddisp.pl?gene=ZAP70
PROS1	Protein S	Protein Coding	P07225	57	GC03M093873	2.20279	https://www.genecards.org/cgi-bin/carddisp.pl?gene=PROS1
HNRNPA1	Heterogeneous Nuclear Ribonucleoprotein A1	Protein Coding	P09651	56	GC12P054280	2.20279	https://www.genecards.org/cgi-bin/carddisp.pl?gene=HNRNPA1
TMBIM6	Transmembrane BAX Inhibitor Motif Containing 6	Protein Coding	P55061	46	GC12P049707	2.20279	https://www.genecards.org/cgi-bin/carddisp.pl?gene=TMBIM6
CCR5	C-C Motif Chemokine Receptor 5	Protein Coding	P51681	56	GC03P057395	2.202	https://www.genecards.org/cgi-bin/carddisp.pl?gene=CCR5
CETP	Cholesteryl Ester Transfer Protein	Protein Coding	P11597	55	GC16P056961	2.17929	https://www.genecards.org/cgi-bin/carddisp.pl?gene=CETP
MPV17	Mitochondrial Inner Membrane Protein MPV17	Protein Coding	P39210	50	GC02M027309	2.17927	https://www.genecards.org/cgi-bin/carddisp.pl?gene=MPV17
NFIB	Nuclear Factor I B	Protein Coding	O00712	53	GC09M014077	2.17877	https://www.genecards.org/cgi-bin/carddisp.pl?gene=NFIB
AIMP2	Aminoacyl TRNA Synthetase Complex Interacting Multifunctional Protein 2	Protein Coding	Q13155	52	GC07P011560	2.17877	https://www.genecards.org/cgi-bin/carddisp.pl?gene=AIMP2
AP2B1	Adaptor Related Protein Complex 2 Subunit Beta 1	Protein Coding	P63010	50	GC17P035578	2.17877	https://www.genecards.org/cgi-bin/carddisp.pl?gene=AP2B1
TRPC5	Transient Receptor Potential Cation Channel Subfamily C Member 5	Protein Coding	Q9UL62	48	GC0XM111774	2.17877	https://www.genecards.org/cgi-bin/carddisp.pl?gene=TRPC5
HAS1	Hyaluronan Synthase 1	Protein Coding	Q92839	47	GC19M093215	2.17877	https://www.genecards.org/cgi-bin/carddisp.pl?gene=HAS1
SFRP5	Secreted Frizzled Related Protein 5	Protein Coding	Q5T4F7	45	GC10M097766	2.17877	https://www.genecards.org/cgi-bin/carddisp.pl?gene=SFRP5
DAOA	D-Amino Acid Oxidase Activator	Protein Coding	P59103	39	GC13P105465	2.17877	https://www.genecards.org/cgi-bin/carddisp.pl?gene=DAOA
MT-ND6	Mitochondrially Encoded NADH:Ubiquinone Oxidoreductase Core Subunit 6	Protein Coding	P03923	40	GCMTM014151	2.17865	https://www.genecards.org/cgi-bin/carddisp.pl?gene=MT-ND6
ELK1	ETS Transcription Factor ELK1	Protein Coding	P19419	53	GC0XM047635	2.17609	https://www.genecards.org/cgi-bin/carddisp.pl?gene=ELK1
SOCS3	Suppressor Of Cytokine Signaling 3	Protein Coding	O14543	52	GC17M078356	2.17609	https://www.genecards.org/cgi-bin/carddisp.pl?gene=SOCS3
KCNJ5	Potassium Inwardly Rectifying Channel Subfamily J Member 5	Protein Coding	P48544	56	GC11P128891	2.17223	https://www.genecards.org/cgi-bin/carddisp.pl?gene=KCNJ5
RNF2	Ring Finger Protein 2	Protein Coding	Q99496	52	GC01P185045	2.16949	https://www.genecards.org/cgi-bin/carddisp.pl?gene=RNF2
SUZ12	SUZ12 Polycomb Repressive Complex 2 Subunit	Protein Coding	Q15022	51	GC17P031937	2.16949	https://www.genecards.org/cgi-bin/carddisp.pl?gene=SUZ12
AGRP	Agouti Related Neuropeptide	Protein Coding	O00253	48	GC16M067482	2.16949	https://www.genecards.org/cgi-bin/carddisp.pl?gene=AGRP
CBX4	Chromobox 4	Protein Coding	O00257	45	GC17M079833	2.16949	https://www.genecards.org/cgi-bin/carddisp.pl?gene=CBX4
ETFA	Electron Transfer Flavoprotein Subunit Alpha	Protein Coding	P13804	53	GC15M148252	2.16181	https://www.genecards.org/cgi-bin/carddisp.pl?gene=ETFA
SNRPB	Small Nuclear Ribonucleoprotein Polypeptides B And B1	Protein Coding	P14678	51	GC20M002461	2.16093	https://www.genecards.org/cgi-bin/carddisp.pl?gene=SNRPB
FBXO31	F-Box Protein 31	Protein Coding	Q5XUX0	46	GC16M087326	2.1546	https://www.genecards.org/cgi-bin/carddisp.pl?gene=FBXO31
RNF146	Ring Finger Protein 146	Protein Coding	Q9NTX7	46	GC06P127266	2.15171	https://www.genecards.org/cgi-bin/carddisp.pl?gene=RNF146
PIK3R1	Phosphoinositide-3-Kinase Regulatory Subunit 1	Protein Coding	P27986	60	GC05P068215	2.14803	https://www.genecards.org/cgi-bin/carddisp.pl?gene=PIK3R1
FECH	Ferrochelatase	Protein Coding	P22830	55	GC18M057544	2.14803	https://www.genecards.org/cgi-bin/carddisp.pl?gene=FECH
CNR2	Cannabinoid Receptor 2	Protein Coding	P34972	54	GC01M023870	2.14803	https://www.genecards.org/cgi-bin/carddisp.pl?gene=CNR2
BDKRB2	Bradykinin Receptor B2	Protein Coding	P30411	53	GC14P096205	2.14803	https://www.genecards.org/cgi-bin/carddisp.pl?gene=BDKRB2
CRBN	Cereblon	Protein Coding	Q96SW2	52	GC03M003144	2.14803	https://www.genecards.org/cgi-bin/carddisp.pl?gene=CRBN
LGALS1	Galectin 1	Protein Coding	P09382	52	GC22P037675	2.14803	https://www.genecards.org/cgi-bin/carddisp.pl?gene=LGALS1
IL11	Interleukin 11	Protein Coding	P20809	50	GC19M055364	2.14803	https://www.genecards.org/cgi-bin/carddisp.pl?gene=IL11
EIF5B	Eukaryotic Translation Initiation Factor 5B	Protein Coding	O60841	48	GC02P099337	2.14803	https://www.genecards.org/cgi-bin/carddisp.pl?gene=EIF5B
NXNL1	Nucleoredoxin Like 1	Protein Coding	Q96CM4	43	GC19M017455	2.14803	https://www.genecards.org/cgi-bin/carddisp.pl?gene=NXNL1
CHAC1	ChaC Glutathione Specific Gamma-Glutamylcyclotransferase 1	Protein Coding	Q9BUX1	41	GC15P040952	2.14803	https://www.genecards.org/cgi-bin/carddisp.pl?gene=CHAC1
ANGPT2	Angiopoietin 2	Protein Coding	O15123	58	GC08M006499	2.13829	https://www.genecards.org/cgi-bin/carddisp.pl?gene=ANGPT2
FEN1	Flap Structure-Specific Endonuclease 1	Protein Coding	P39748	55	GC11P088776	2.13829	https://www.genecards.org/cgi-bin/carddisp.pl?gene=FEN1
PPP2R2B	Protein Phosphatase 2 Regulatory Subunit Bbeta	Protein Coding	Q00005	53	GC05M146582	2.13795	https://www.genecards.org/cgi-bin/carddisp.pl?gene=PPP2R2B
RAP1A	RAP1A, Member Of RAS Oncogene Family	Protein Coding	P62834	53	GC01P111542	2.13795	https://www.genecards.org/cgi-bin/carddisp.pl?gene=RAP1A
PSMD3	Proteasome 26S Subunit, Non-ATPase 3	Protein Coding	O43242	51	GC17P039980	2.13795	https://www.genecards.org/cgi-bin/carddisp.pl?gene=PSMD3
S100A6	S100 Calcium Binding Protein A6	Protein Coding	P06703	51	GC01M160893	2.13795	https://www.genecards.org/cgi-bin/carddisp.pl?gene=S100A6
SPAST	Spastin	Protein Coding	Q9UBP0	51	GC02P032063	2.13795	https://www.genecards.org/cgi-bin/carddisp.pl?gene=SPAST
JMJD1C	Jumonji Domain Containing 1C	Protein Coding	Q15652	50	GC10M063167	2.13795	https://www.genecards.org/cgi-bin/carddisp.pl?gene=JMJD1C
RHBDF2	Rhomboid 5 Homolog 2	Protein Coding	Q6PJF5	50	GC17M076470	2.13795	https://www.genecards.org/cgi-bin/carddisp.pl?gene=RHBDF2
NUAK1	NUAK Family Kinase 1	Protein Coding	O60285	49	GC12M106063	2.13795	https://www.genecards.org/cgi-bin/carddisp.pl?gene=NUAK1
PSMD6	Proteasome 26S Subunit, Non-ATPase 6	Protein Coding	Q15008	49	GC03M063973	2.13795	https://www.genecards.org/cgi-bin/carddisp.pl?gene=PSMD6
PSMD11	Proteasome 26S Subunit, Non-ATPase 11	Protein Coding	O00231	48	GC17P032444	2.13795	https://www.genecards.org/cgi-bin/carddisp.pl?gene=PSMD11
TMED4	Transmembrane P24 Trafficking Protein 4	Protein Coding	Q7Z7H5	44	GC07M044577	2.13795	https://www.genecards.org/cgi-bin/carddisp.pl?gene=TMED4
COQ10A	Coenzyme Q10A	Protein Coding	Q96MF6	43	GC12P056266	2.13795	https://www.genecards.org/cgi-bin/carddisp.pl?gene=COQ10A
BIVM-ERCC5	BIVM-ERCC5 Readthrough	Protein Coding		24	GC13P102830	2.13795	https://www.genecards.org/cgi-bin/carddisp.pl?gene=BIVM-ERCC5
CHRNA7	Cholinergic Receptor Nicotinic Alpha 7 Subunit	Protein Coding	P36544	53	GC15P031923	2.13782	https://www.genecards.org/cgi-bin/carddisp.pl?gene=CHRNA7
NPHS1	NPHS1 Adhesion Molecule, Nephrin	Protein Coding	O60500	55	GC19M035825	2.13129	https://www.genecards.org/cgi-bin/carddisp.pl?gene=NPHS1
PAFAH1B1	Platelet Activating Factor Acetylhydrolase 1b Regulatory Subunit 1	Protein Coding	P43034	55	GC17P002593	2.13129	https://www.genecards.org/cgi-bin/carddisp.pl?gene=PAFAH1B1
VEGFC	Vascular Endothelial Growth Factor C	Protein Coding	P49767	55	GC04M176683	2.13129	https://www.genecards.org/cgi-bin/carddisp.pl?gene=VEGFC
FMR1	Fragile X Messenger Ribonucleoprotein 1	Protein Coding	Q06787	53	GC0XP148000	2.13129	https://www.genecards.org/cgi-bin/carddisp.pl?gene=FMR1
PRPF19	Pre-MRNA Processing Factor 19	Protein Coding	Q9UMS4	44	GC11M060890	2.13129	https://www.genecards.org/cgi-bin/carddisp.pl?gene=PRPF19
ITGA3	Integrin Subunit Alpha 3	Protein Coding	P26006	56	GC17P050055	2.13126	https://www.genecards.org/cgi-bin/carddisp.pl?gene=ITGA3
DUOX2	Dual Oxidase 2	Protein Coding	Q9NRD8	52	GC15M045092	2.12735	https://www.genecards.org/cgi-bin/carddisp.pl?gene=DUOX2
PAFAH2	Platelet Activating Factor Acetylhydrolase 2	Protein Coding	Q99487	42	GC01M030928	2.12252	https://www.genecards.org/cgi-bin/carddisp.pl?gene=PAFAH2
WNT5A	Wnt Family Member 5A	Protein Coding	P41221	60	GC03M055465	2.11836	https://www.genecards.org/cgi-bin/carddisp.pl?gene=WNT5A
F5	Coagulation Factor V	Protein Coding	P12259	56	GC01M169511	2.11836	https://www.genecards.org/cgi-bin/carddisp.pl?gene=F5
YY1	YY1 Transcription Factor	Protein Coding	P25490	56	GC14P100238	2.11836	https://www.genecards.org/cgi-bin/carddisp.pl?gene=YY1
ATG5	Autophagy Related 5	Protein Coding	Q9H1Y0	54	GC06M106045	2.11836	https://www.genecards.org/cgi-bin/carddisp.pl?gene=ATG5
CUL1	Cullin 1	Protein Coding	Q13616	53	GC07P148697	2.11836	https://www.genecards.org/cgi-bin/carddisp.pl?gene=CUL1
PALB2	Partner And Localizer Of BRCA2	Protein Coding	Q86YC2	53	GC16M023603	2.11836	https://www.genecards.org/cgi-bin/carddisp.pl?gene=PALB2
ATP2C1	ATPase Secretory Pathway Ca2+ Transporting 1	Protein Coding	P98194	52	GC03P130850	2.11836	https://www.genecards.org/cgi-bin/carddisp.pl?gene=ATP2C1
MSH3	MutS Homolog 3	Protein Coding	P20585	52	GC05P080654	2.11836	https://www.genecards.org/cgi-bin/carddisp.pl?gene=MSH3
HAGH	Hydroxyacylglutathione Hydrolase	Protein Coding	Q16775	51	GC16M001795	2.11836	https://www.genecards.org/cgi-bin/carddisp.pl?gene=HAGH
ATP5F1B	ATP Synthase F1 Subunit Beta	Protein Coding	P06576	50	GC12M059279	2.11836	https://www.genecards.org/cgi-bin/carddisp.pl?gene=ATP5F1B
NR4A3	Nuclear Receptor Subfamily 4 Group A Member 3	Protein Coding	Q92570	49	GC09P099821	2.11836	https://www.genecards.org/cgi-bin/carddisp.pl?gene=NR4A3
TUBB	Tubulin Beta Class I	Protein Coding	P07437	58	GC06P134798	2.10578	https://www.genecards.org/cgi-bin/carddisp.pl?gene=TUBB
PPP2CA	Protein Phosphatase 2 Catalytic Subunit Alpha	Protein Coding	P67775	57	GC05M134194	2.10578	https://www.genecards.org/cgi-bin/carddisp.pl?gene=PPP2CA
ZEB1	Zinc Finger E-Box Binding Homeobox 1	Protein Coding	P37275	57	GC10P031318	2.10578	https://www.genecards.org/cgi-bin/carddisp.pl?gene=ZEB1
NGFR	Nerve Growth Factor Receptor	Protein Coding	P08138	56	GC17P049495	2.10578	https://www.genecards.org/cgi-bin/carddisp.pl?gene=NGFR
TFR2	Transferrin Receptor 2	Protein Coding	Q9UP52	53	GC07M100620	2.10578	https://www.genecards.org/cgi-bin/carddisp.pl?gene=TFR2
HNRNPD	Heterogeneous Nuclear Ribonucleoprotein D	Protein Coding	Q14103	50	GC04M082352	2.10578	https://www.genecards.org/cgi-bin/carddisp.pl?gene=HNRNPD
AHCYL1	Adenosylhomocysteinase Like 1	Protein Coding	O43865	51	GC01P109984	2.10549	https://www.genecards.org/cgi-bin/carddisp.pl?gene=AHCYL1
GRIN1	Glutamate Ionotropic Receptor NMDA Type Subunit 1	Protein Coding	Q05586	59	GC09P137138	2.10138	https://www.genecards.org/cgi-bin/carddisp.pl?gene=GRIN1
ITGAM	Integrin Subunit Alpha M	Protein Coding	P11215	56	GC16P081706	2.10138	https://www.genecards.org/cgi-bin/carddisp.pl?gene=ITGAM
RNF4	Ring Finger Protein 4	Protein Coding	P78317	47	GC04P002462	2.10138	https://www.genecards.org/cgi-bin/carddisp.pl?gene=RNF4
SELENOS	Selenoprotein S	Protein Coding	Q9BQE4	42	GC15M148764	2.09341	https://www.genecards.org/cgi-bin/carddisp.pl?gene=SELENOS
IL6R	Interleukin 6 Receptor	Protein Coding	P08887	59	GC01P154405	2.09161	https://www.genecards.org/cgi-bin/carddisp.pl?gene=IL6R
BMP1	Bone Morphogenetic Protein 1	Protein Coding	P13497	57	GC08P022165	2.09161	https://www.genecards.org/cgi-bin/carddisp.pl?gene=BMP1
DGAT1	Diacylglycerol O-Acyltransferase 1	Protein Coding	O75907	55	GC08M146612	2.09161	https://www.genecards.org/cgi-bin/carddisp.pl?gene=DGAT1
ITGA2	Integrin Subunit Alpha 2	Protein Coding	P17301	55	GC05P052989	2.09161	https://www.genecards.org/cgi-bin/carddisp.pl?gene=ITGA2
PTPN12	Protein Tyrosine Phosphatase Non-Receptor Type 12	Protein Coding	Q05209	55	GC07P077537	2.09161	https://www.genecards.org/cgi-bin/carddisp.pl?gene=PTPN12
KLRK1	Killer Cell Lectin Like Receptor K1	Protein Coding	P26718	50	GC12M029496	2.09161	https://www.genecards.org/cgi-bin/carddisp.pl?gene=KLRK1
MICU1	Mitochondrial Calcium Uptake 1	Protein Coding	Q9BPX6	50	GC10M072367	2.09161	https://www.genecards.org/cgi-bin/carddisp.pl?gene=MICU1
VSNL1	Visinin Like 1	Protein Coding	P62760	49	GC02P017539	2.09161	https://www.genecards.org/cgi-bin/carddisp.pl?gene=VSNL1
STEAP1	STEAP Family Member 1	Protein Coding	Q9UHE8	48	GC07P090154	2.09161	https://www.genecards.org/cgi-bin/carddisp.pl?gene=STEAP1
TMEM59L	Transmembrane Protein 59 Like	Protein Coding	Q9UK28	39	GC19P018607	2.09161	https://www.genecards.org/cgi-bin/carddisp.pl?gene=TMEM59L
RAD52	RAD52 Homolog, DNA Repair Protein	Protein Coding	P43351	50	GC12M000912	2.0916	https://www.genecards.org/cgi-bin/carddisp.pl?gene=RAD52
ITCH	Itchy E3 Ubiquitin Protein Ligase	Protein Coding	Q96J02	55	GC20P034363	2.08677	https://www.genecards.org/cgi-bin/carddisp.pl?gene=ITCH
KLK3	Kallikrein Related Peptidase 3	Protein Coding	P07288	55	GC19P050854	2.08677	https://www.genecards.org/cgi-bin/carddisp.pl?gene=KLK3
PSMD4	Proteasome 26S Subunit Ubiquitin Receptor, Non-ATPase 4	Protein Coding	P55036	53	GC01P164294	2.08677	https://www.genecards.org/cgi-bin/carddisp.pl?gene=PSMD4
TG	Thyroglobulin	Protein Coding	P01266	53	GC08P132866	2.08677	https://www.genecards.org/cgi-bin/carddisp.pl?gene=TG
HJV	Hemojuvelin BMP Co-Receptor	Protein Coding	Q6ZVN8	52	GC01M160501	2.08677	https://www.genecards.org/cgi-bin/carddisp.pl?gene=HJV
DNAJA1	DnaJ Heat Shock Protein Family (Hsp40) Member A1	Protein Coding	P31689	49	GC09P033025	2.08677	https://www.genecards.org/cgi-bin/carddisp.pl?gene=DNAJA1
IMMT	Inner Membrane Mitochondrial Protein	Protein Coding	Q16891	48	GC02M086144	2.08677	https://www.genecards.org/cgi-bin/carddisp.pl?gene=IMMT
ENTPD1	Ectonucleoside Triphosphate Diphosphohydrolase 1	Protein Coding	P49961	58	GC10P109494	2.07909	https://www.genecards.org/cgi-bin/carddisp.pl?gene=ENTPD1
NF2	NF2, Moesin-Ezrin-Radixin Like (MERLIN) Tumor Suppressor	Protein Coding	P35240	58	GC22P029603	2.07909	https://www.genecards.org/cgi-bin/carddisp.pl?gene=NF2
REL	REL Proto-Oncogene, NF-KB Subunit	Protein Coding	Q04864	55	GC02P060881	2.07909	https://www.genecards.org/cgi-bin/carddisp.pl?gene=REL
CUL2	Cullin 2	Protein Coding	Q13617	52	GC10M035808	2.07909	https://www.genecards.org/cgi-bin/carddisp.pl?gene=CUL2
PTPRA	Protein Tyrosine Phosphatase Receptor Type A	Protein Coding	P18433	52	GC20P002864	2.07909	https://www.genecards.org/cgi-bin/carddisp.pl?gene=PTPRA
TUFM	Tu Translation Elongation Factor, Mitochondrial	Protein Coding	P49411	52	GC16M043919	2.07909	https://www.genecards.org/cgi-bin/carddisp.pl?gene=TUFM
MDH1	Malate Dehydrogenase 1	Protein Coding	P40925	51	GC02P063557	2.07909	https://www.genecards.org/cgi-bin/carddisp.pl?gene=MDH1
RPL29	Ribosomal Protein L29	Protein Coding	P47914	46	GC03M053869	2.07909	https://www.genecards.org/cgi-bin/carddisp.pl?gene=RPL29
HNF1A	HNF1 Homeobox A	Protein Coding	P20823	55	GC12P120978	2.06193	https://www.genecards.org/cgi-bin/carddisp.pl?gene=HNF1A
NADK	NAD Kinase	Protein Coding	O95544	46	GC01M001751	2.06056	https://www.genecards.org/cgi-bin/carddisp.pl?gene=NADK
EEF2K	Eukaryotic Elongation Factor 2 Kinase	Protein Coding	O00418	54	GC16P081129	2.05283	https://www.genecards.org/cgi-bin/carddisp.pl?gene=EEF2K
HLA-G	Major Histocompatibility Complex, Class I, G	Protein Coding	P17693	53	GC06P134763	2.05283	https://www.genecards.org/cgi-bin/carddisp.pl?gene=HLA-G
SLC7A1	Solute Carrier Family 7 Member 1	Protein Coding	P30825	50	GC13M029509	2.05283	https://www.genecards.org/cgi-bin/carddisp.pl?gene=SLC7A1
CSN1S1	Casein Alpha S1	Protein Coding	P47710	45	GC04P070027	2.05283	https://www.genecards.org/cgi-bin/carddisp.pl?gene=CSN1S1
HERPUD1	Homocysteine Inducible ER Protein With Ubiquitin Like Domain 1	Protein Coding	Q15011	44	GC16P056932	2.05283	https://www.genecards.org/cgi-bin/carddisp.pl?gene=HERPUD1
F10	Coagulation Factor X	Protein Coding	P00742	59	GC13P113122	2.05102	https://www.genecards.org/cgi-bin/carddisp.pl?gene=F10
ATP1A1	ATPase Na+/K+ Transporting Subunit Alpha 1	Protein Coding	P05023	58	GC01P116372	2.05102	https://www.genecards.org/cgi-bin/carddisp.pl?gene=ATP1A1
TGIF1	TGFB Induced Factor Homeobox 1	Protein Coding	Q15583	55	GC18P003411	2.05102	https://www.genecards.org/cgi-bin/carddisp.pl?gene=TGIF1
MCM5	Minichromosome Maintenance Complex Component 5	Protein Coding	P33992	53	GC22P035400	2.05102	https://www.genecards.org/cgi-bin/carddisp.pl?gene=MCM5
PDGFA	Platelet Derived Growth Factor Subunit A	Protein Coding	P04085	53	GC07M000497	2.05102	https://www.genecards.org/cgi-bin/carddisp.pl?gene=PDGFA
PNPLA2	Patatin Like Phospholipase Domain Containing 2	Protein Coding	Q96AD5	53	GC11P010627	2.05102	https://www.genecards.org/cgi-bin/carddisp.pl?gene=PNPLA2
PHB2	Prohibitin 2	Protein Coding	Q99623	50	GC12M006965	2.05102	https://www.genecards.org/cgi-bin/carddisp.pl?gene=PHB2
ATG9B	Autophagy Related 9B	Protein Coding	Q674R7	45	GC07M151012	2.05102	https://www.genecards.org/cgi-bin/carddisp.pl?gene=ATG9B
HSF2	Heat Shock Transcription Factor 2	Protein Coding	Q03933	48	GC06P122399	2.04735	https://www.genecards.org/cgi-bin/carddisp.pl?gene=HSF2
NCOA7	Nuclear Receptor Coactivator 7	Protein Coding	Q8NI08	44	GC06P125781	2.04538	https://www.genecards.org/cgi-bin/carddisp.pl?gene=NCOA7
CFL1	Cofilin 1	Protein Coding	P23528	54	GC11M065823	2.04068	https://www.genecards.org/cgi-bin/carddisp.pl?gene=CFL1
NKRF	NFKB Repressing Factor	Protein Coding	O15226	43	GC0XM119588	2.04068	https://www.genecards.org/cgi-bin/carddisp.pl?gene=NKRF
BOLA1	BolA Family Member 1	Protein Coding	Q9Y3E2	43	GC01P164205	2.03714	https://www.genecards.org/cgi-bin/carddisp.pl?gene=BOLA1
OSR1	Odd-Skipped Related Transcription Factor 1	Protein Coding	Q8TAX0	43	GC02M019351	2.03714	https://www.genecards.org/cgi-bin/carddisp.pl?gene=OSR1
HSPE1	Heat Shock Protein Family E (Hsp10) Member 1	Protein Coding	P61604	51	GC02P197501	2.03664	https://www.genecards.org/cgi-bin/carddisp.pl?gene=HSPE1
PGAM2	Phosphoglycerate Mutase 2	Protein Coding	P15259	50	GC07M044062	2.03664	https://www.genecards.org/cgi-bin/carddisp.pl?gene=PGAM2
PLA2G4C	Phospholipase A2 Group IVC	Protein Coding	Q9UP65	44	GC19M048047	2.03664	https://www.genecards.org/cgi-bin/carddisp.pl?gene=PLA2G4C
TMEM179	Transmembrane Protein 179	Protein Coding	Q6ZVK1	32	GC14M119936	2.03664	https://www.genecards.org/cgi-bin/carddisp.pl?gene=TMEM179
ERO1A	Endoplasmic Reticulum Oxidoreductase 1 Alpha	Protein Coding	Q96HE7	50	GC14M052640	2.03034	https://www.genecards.org/cgi-bin/carddisp.pl?gene=ERO1A
PSMB1	Proteasome 20S Subunit Beta 1	Protein Coding	P20618	54	GC06M170535	2.02881	https://www.genecards.org/cgi-bin/carddisp.pl?gene=PSMB1
PSMB7	Proteasome 20S Subunit Beta 7	Protein Coding	Q99436	47	GC09M124353	2.02881	https://www.genecards.org/cgi-bin/carddisp.pl?gene=PSMB7
NT5E	5'-Nucleotidase Ecto	Protein Coding	P21589	60	GC06P085449	2.02135	https://www.genecards.org/cgi-bin/carddisp.pl?gene=NT5E
PPIB	Peptidylprolyl Isomerase B	Protein Coding	P23284	58	GC15M064155	2.02135	https://www.genecards.org/cgi-bin/carddisp.pl?gene=PPIB
MITF	Melanocyte Inducing Transcription Factor	Protein Coding	O75030	57	GC03P069740	2.02135	https://www.genecards.org/cgi-bin/carddisp.pl?gene=MITF
CD79A	CD79a Molecule	Protein Coding	P11912	56	GC19P041877	2.02135	https://www.genecards.org/cgi-bin/carddisp.pl?gene=CD79A
FAF1	Fas Associated Factor 1	Protein Coding	Q9UNN5	49	GC01M050439	2.02135	https://www.genecards.org/cgi-bin/carddisp.pl?gene=FAF1
GLS2	Glutaminase 2	Protein Coding	Q9UI32	47	GC12M056470	2.02135	https://www.genecards.org/cgi-bin/carddisp.pl?gene=GLS2
SRSF3	Serine And Arginine Rich Splicing Factor 3	Protein Coding	P84103	47	GC06P134982	2.02135	https://www.genecards.org/cgi-bin/carddisp.pl?gene=SRSF3
ILF3	Interleukin Enhancer Binding Factor 3	Protein Coding	Q12906	46	GC19P112301	2.02135	https://www.genecards.org/cgi-bin/carddisp.pl?gene=ILF3
PAX3	Paired Box 3	Protein Coding	P23760	55	GC02M222199	2.01622	https://www.genecards.org/cgi-bin/carddisp.pl?gene=PAX3
RDH12	Retinol Dehydrogenase 12	Protein Coding	Q96NR8	53	GC14P067701	2.01622	https://www.genecards.org/cgi-bin/carddisp.pl?gene=RDH12
CD34	CD34 Molecule	Protein Coding	P28906	54	GC01M207880	2.01592	https://www.genecards.org/cgi-bin/carddisp.pl?gene=CD34
USF1	Upstream Transcription Factor 1	Protein Coding	P22415	53	GC01M161039	2.01592	https://www.genecards.org/cgi-bin/carddisp.pl?gene=USF1
UBE2D3	Ubiquitin Conjugating Enzyme E2 D3	Protein Coding	P61077	52	GC04M102794	2.01592	https://www.genecards.org/cgi-bin/carddisp.pl?gene=UBE2D3
AGK	Acylglycerol Kinase	Protein Coding	Q53H12	50	GC07P141551	2.01592	https://www.genecards.org/cgi-bin/carddisp.pl?gene=AGK
DGKK	Diacylglycerol Kinase Kappa	Protein Coding	Q5KSL6	44	GC0XM050365	2.01567	https://www.genecards.org/cgi-bin/carddisp.pl?gene=DGKK
NUP93	Nucleoporin 93	Protein Coding	Q8N1F7	48	GC16P082480	2.01422	https://www.genecards.org/cgi-bin/carddisp.pl?gene=NUP93
